# Supplementary material for: Nickel-catalyzed [2 + 2 + 2] benzannulation of alkynes: a new route to the synthesis of highly substituted naphthalenes
Source: Royal Society of Chemistry journal article supplement (doi:10.1039/d2ob00513a), 2022-01-01
Supplement: d2ob00513a1.pdf [file d2ob00513a1.pdf]

**–Electronic Supporting Information –**

**Nickel-catalyzed [2+2+2] benzannulation of  
alkynes: a new route to synthesis of highly  
substituted naphthalenes**

Sampath Thavaselvan and Kanniyappan Parthasarathy\*

Department of Organic Chemistry,  
University of Madras, Chennai 600025, Tamil nadu.  
*e-mail:* [kparthasarathy@unom.ac.in](mailto:kparthasarathy@unom.ac.in)

| <b>Table of Contents</b>                                 | <b>Page No</b> |
|----------------------------------------------------------|----------------|
| General information                                      | S3             |
| General procedure for the Ni-catalyzed C-H annulation    | S5             |
| Procedure for gram scale synthesis of <b>5a</b>          | S5             |
| <sup>1</sup> H NMR, <sup>13</sup> C NMR and HRMS data    | S6             |
| X-ray crystal data of compound <b>3k</b>                 | S22            |
| ORTEP crystal structure of compound <b>3k</b>            | S33            |
| References                                               | S34            |
| Copies of <sup>1</sup> H and <sup>13</sup> C NMR Spectra | S35            |

## General information

All product mixtures were analyzed by thin layer chromatography using aluminum foil backed silica TLC plates with a fluorescent indicator from Merck. UV-active compounds were detected with a UV lamp ( $\lambda = 254$  nm). For flash column chromatography, silica gel was used as stationary phase.  $^1\text{H}$  and  $^{13}\text{C}$  NMR spectra were recorded on Bruker (300 MHz and 500 MHz) in deuterated chloroform at 25 °C. Chemical shifts ( $\delta$ ) are reported in ppm, and spin-spin coupling constants ( $J$ ) are given in Hz, while multiplicities are abbreviated by br s (broad singlet), s (singlet), d (doublet), t (triplet), q (quartet) and m (multiplet). High resolution mass spectra (HRMS) were recorded on Waters Xevo G2S QToF (ESI) instrument.

All solvents were dried according to known methods and distilled prior to use.<sup>1</sup> 1-(2-iodophenyl)-1*H*-pyrazole **1a-b**,<sup>2a-b</sup> 4-chloro-1-(2-iodophenyl)-1*H*-pyrazole **1c**,<sup>3</sup> 1-(2-bromophenyl)-4-phenyl-1*H*-pyrazole **1d**,<sup>4</sup> 2-(2-bromophenyl)imidazo[1,2-*a*]pyridine **4a**,<sup>5</sup> 1-(2-bromophenyl)-4-phenyl-1*H*-1,2,3-triazole **8a**<sup>6</sup> and alkynes **2b-2f**<sup>7</sup> were synthesized according to literature procedures. The nickel(II) complex  $\text{NiBr}_2(\text{dppe})$  was prepared according to the literature protocols.<sup>8</sup> All other reagents were purchased from Sigma-Aldrich, Acros or Alfa Aesar and used without further purification.

### Scheme: S1 Synthesis of 1-(2-iodophenyl)-1*H*-pyrazole (**1a-b**)<sup>2a-b</sup>

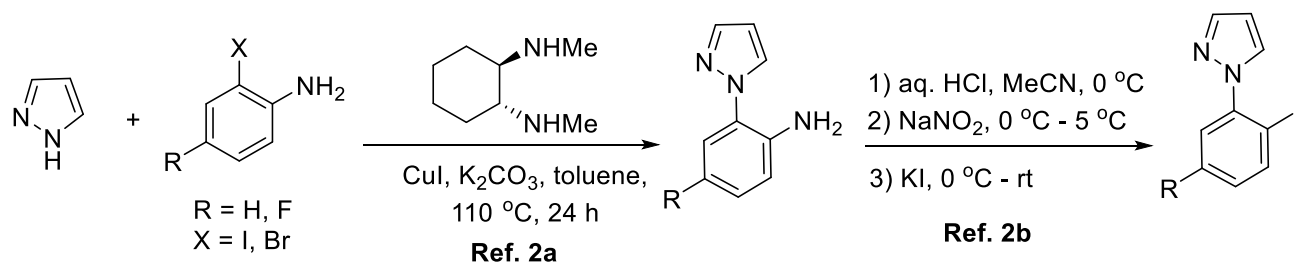

### Scheme: S2 Synthesis of 4-chloro-1-(2-iodophenyl)-1*H*-pyrazole (**1c**)<sup>3</sup>

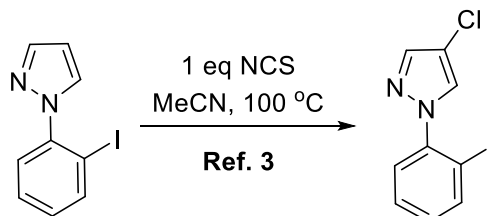

**Scheme: S3 Synthesis of 1-(2-bromophenyl)-4-phenyl-1H-pyrazole (1d)** <sup>2a, 3, 4</sup>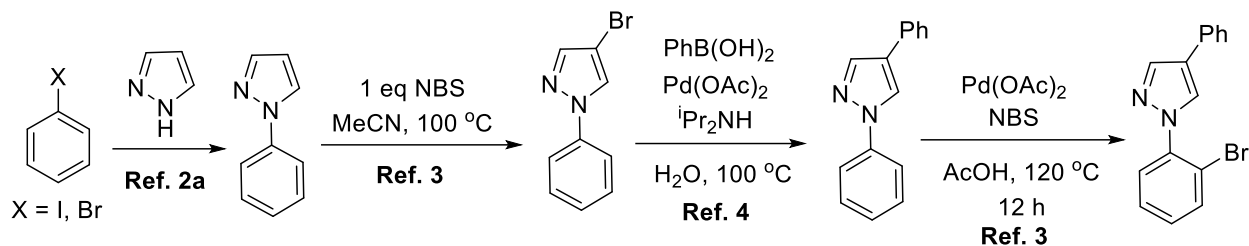**Scheme: S4 Preparation of 2-(2-(2-bromophenyl)imidazo[1,2-a]pyridine (4a-f, 6a-c)** <sup>5</sup>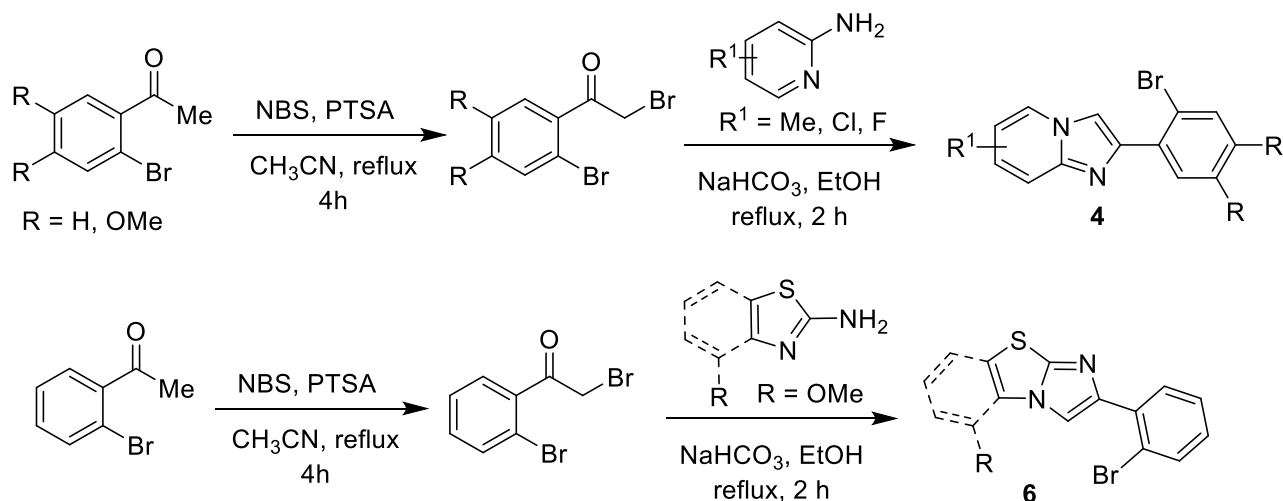

A solution of 2'-bromoacetophenone (2g, 10 mmol), N-bromosuccinimide (1.78g, 10 mmol) and *p*-toluenesulphonic acid (2.59g, 15.0 mmol) in acetonitrile (15 mL) was stirred for 4 h at 85 °C. Up on completion, the reaction was allowed to cool to room temperature and the solvent was evaporated. The residue was diluted with water and the product was extracted into ethyl acetate (3x15 mL). The organic layer was dried over anhydrous sodium sulphate and the solution was evaporated to dryness. The crude 2-bromo-1-(2-bromophenyl)ethanone (light brown liquid) was subjected to next step without further purifications.

To a solution of 2-bromo-1-(2-bromophenyl)ethanone (2.4g, 9.10 mmol) and sodium bicarbonate (1.14g, 13.65 mmol) in ethanol (20 mL) was added 2-aminopyridine (1g, 9.10 mmol) and the reaction mixture was stirred at 80 °C for 2 h. After completion (based on TLC), the reaction mass was allowed to cool to room temperature and the solvent were evaporated. The residue was diluted with water and extracted into ethyl acetate (3x15 mL). The organic layer was dried over anhydrous sodium sulphate and the solution was evaporated to dryness. The crude

residue was purified by column chromatography to get pure product **4a**. Similar experimental procedure was applied for the synthesis of **4b-f**, **6a-c**.

**Scheme: S5 General procedure for the nickel-catalyzed benzannulation of 1-(2-iodophenyl)-1H-pyrazole with alkynes:**

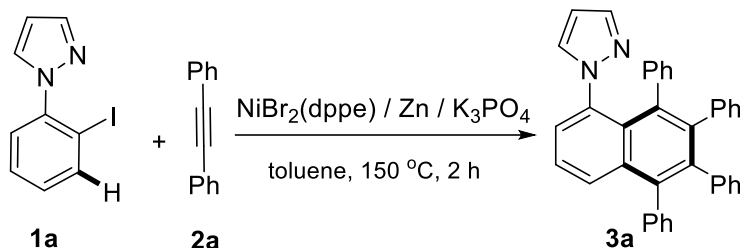

To a Schlenk tube (20 mL) equipped with magnetic stir bar were loaded 1-(2-iodophenyl)-1H-pyrazole **1a** (0.277 mmol), diphenylacetylene **2a** (0.831 mmol),  $\text{NiBr}_2(\text{dppe})$  (10 mol %), Zn (3 equiv)  $\text{K}_3\text{PO}_4$  (1 equiv). Then, dry toluene (3 mL) was added to the system via a syringe and the reaction mixture was allowed to stir at  $150\text{ }^\circ\text{C}$  (oil bath) for 2 h. When the reaction was completed, the mixture was cooled and diluted with  $\text{CH}_2\text{Cl}_2$  (10 mL). The mixture was filtered through a Celite pad and the Celite pad was washed with dichloromethane (3 x 15 mL). The combined filtrate was concentrated and the residue was purified by a silica gel column chromatography using hexane–EtOAc as eluent to give pure product **3a**. Similar experimental procedure was applied for the synthesis of **3b-l**, **5a-k**, **7a-e**, **9a**.

**Scheme: S6 Gram scale synthesis of 5a**

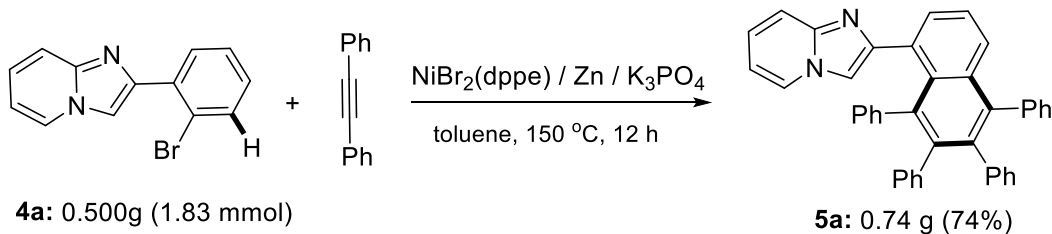

To a Schlenk tube (50 mL) equipped with magnetic stir bar were loaded 2-(2-bromophenyl)imidazo[1,2-*a*]pyridine **4a** (0.5g, 1.830 mmol), diphenylacetylene **2a** (0.978 g, 5.49 mmol),  $\text{NiBr}_2(\text{dppe})$  (10 mol %), Zn (3 equiv) and  $\text{K}_3\text{PO}_4$  (1 equiv). Then, toluene (10 mL) was added to the system via a syringe and the reaction mixture was allowed to stir at  $150\text{ }^\circ\text{C}$  for 12 h. When the reaction was completed, the mixture was cooled and diluted with  $\text{CH}_2\text{Cl}_2$  (20 mL). The mixture was filtered through a Celite pad and the Celite pad was washed with dichloromethane (3 x 20 mL). The combined filtrate was concentrated and the residue was

purified by a silica gel column chromatography using hexane–EtOAc as eluent to give pure product **5a** in 74% yield.

**1-(5,6,7,8-Tetraphenylnaphthalen-1-yl)-1H-pyrazole (3a)**

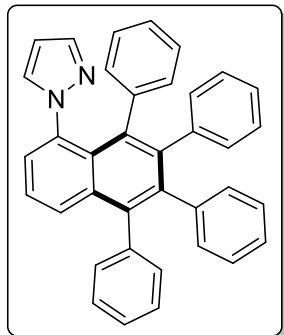

White solid, eluent: (hexane/EtOAc, 95:5), m.p. 170-173 °C, yield: (112 mg, 85%). **<sup>1</sup>H NMR (300 MHz, CDCl<sub>3</sub>)** δ 7.79 – 7.76 (m, 1H), 7.44 – 7.41 (m, 2H), 7.27 – 7.16 (m, 8H), 6.83 – 6.77 (m, 12H), 6.66 (s, 2H), 5.74 (d, *J* = 1.8 Hz, 1H) ppm. **<sup>13</sup>C NMR (75 MHz, CDCl<sub>3</sub>)** δ 142.3, 140.3, 140.2, 139.9, 139.8, 139.6, 139.5, 138.7, 138.1, 136.3, 134.3, 132.3, 131.3, 131.2, 131.0, 130.9, 128.9, 127.6 (2C), 126.6, 126.5, 126.2, 126.0, 125.4, 125.1, 125.0, 124.7, 105.9 ppm. **HRMS (ESI-TOF) m/z:** [M + H]<sup>+</sup> Calcd for C<sub>37</sub>H<sub>26</sub>N<sub>2</sub> 499.2174, found 499.2171.

**1-(3-Fluoro-5,6,7,8-tetraphenylnaphthalen-1-yl)-1H-pyrazole (3b)**

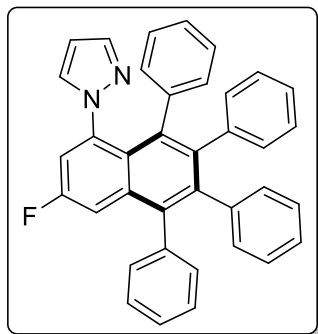

Yellow oil, eluent: (hexane/EtOAc, 95:5), yield: (93 mg, 69%). **<sup>1</sup>H NMR (300 MHz, CDCl<sub>3</sub>)** δ 7.40 (dd, *J*<sub>1</sub> = 10.2 Hz, *J*<sub>2</sub> = 2.4 Hz, 1H), 7.27 - 7.19 (m, 7H), 7.15 (d, *J* = 2.1 Hz, 1H), 6.83 – 6.77 (m, 13H), 6.64 (d, *J* = 2.4 Hz, 2H), 5.75 (d, *J* = 1.8 Hz, 1H) ppm. **<sup>13</sup>C NMR (75 MHz, CDCl<sub>3</sub>)** δ 158.8 (d, *J*<sub>CF</sub> = 245.2 Hz), 141.6 (d, *J*<sub>CF</sub> = 2.2 Hz), 140.9, 140.3, 140.1, 139.9 (2C), 139.7, 139.1, 138.3 (d, *J*<sub>CF</sub> = 5.2 Hz), 136.5, 135.2 (d, *J*<sub>CF</sub> = 9.0 Hz), 132.3, 131.2, 131.1, 130.8, 127.8, 126.9, 126.6, 126.3, 126.1, 125.5, 125.3, 125.1, 124.8, 117.8 (d, *J*<sub>CF</sub> = 26.2 Hz), 112.2 (d, *J*<sub>CF</sub> = 21.0 Hz), 106.3 ppm. **HRMS (ESI-TOF) m/z:** [M + H]<sup>+</sup> Calcd for C<sub>37</sub>H<sub>25</sub>FN<sub>2</sub> 517.2080, found 517.2079. **<sup>19</sup>F NMR (471 MHz, CDCl<sub>3</sub>)** δ -114.64 (s) ppm.

#### 4-Chloro-1-(5,6,7,8-tetraphenylnaphthalen-1-yl)-1H-pyrazole (3c)

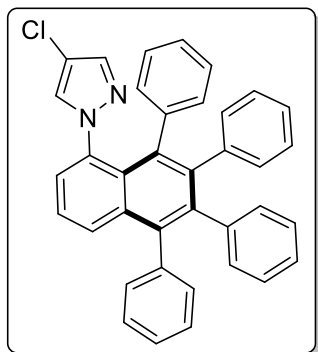

White solid, eluent: (hexane/EtOAc, 95:5), m.p. 185-188 °C, yield: (92 mg, 70%).  $^1\text{H NMR}$  (300 MHz,  $\text{CDCl}_3$ )  $\delta$  7.80 (d,  $J = 5.4$  Hz, 1H), 7.42 (d,  $J = 4.5$  Hz, 2H), 7.26 – 7.23 (m, 6H), 7.09 (s, 1H), 7.03 (s, 1H), 6.83 – 6.78 (m, 13H), 6.66 (s, 1H) ppm.  $^{13}\text{C NMR}$  (75 MHz,  $\text{CDCl}_3$ )  $\delta$  142.5, 140.21, 140.0, 139.5, 139.1, 138.9, 138.2, 137.5, 135.9, 134.3, 131.2, 131.1, 131.0, 130.8, 129.5, 127.7, 127.6, 126.7, 126.5, 126.3, 125.4 (2C), 125.2, 124.7, 110.4 ppm. HRMS (ESI-TOF)  $m/z$ :  $[\text{M} + \text{H}]^+$  Calcd for  $\text{C}_{37}\text{H}_{25}\text{ClN}_2$  533.1785, found 533.1793.

#### 4-Phenyl-1-(5,6,7,8-tetraphenylnaphthalen-1-yl)-1H-pyrazole (3d)

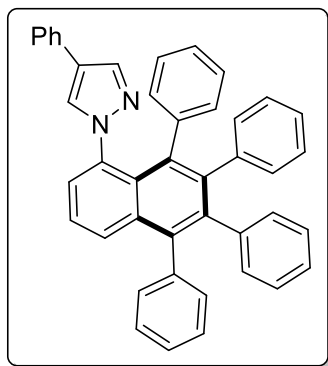

White solid, eluent: (hexane/EtOAc, 95:5), m.p. 188-190 °C, yield: (85 mg, 59%).  $^1\text{H NMR}$  (300 MHz,  $\text{CDCl}_3$ )  $\delta$  7.79 (d,  $J = 8.1$  Hz, 1H), 7.50 – 7.41 (m, 4H), 7.31 – 7.19 (m, 10H), 7.06 (d,  $J = 7.8$  Hz, 1H), 6.85 – 6.81 (m, 7H), 6.77 – 6.72 (m, 7H) ppm.  $^{13}\text{C NMR}$  (75 MHz,  $\text{CDCl}_3$ )  $\delta$  142.4, 142.3, 140.3, 140.2 (2C), 140.0, 139.9, 139.6, 139.5, 139.3, 138.9, 137.9, 137.7, 137.5, 137.4, 136.2, 134.4, 132.7, 131.7, 131.3, 131.2, 131.0, 129.8, 129.3, 129.1, 128.5, 127.6, 127.2, 126.6, 126.5, 126.3, 126.0, 125.7, 125.4, 125.2, 125.1, 124.8, 123.2, 122.1, 119.7 ppm. HRMS (ESI-TOF)  $m/z$ :  $[\text{M} + \text{H}]^+$  Calcd for  $\text{C}_{43}\text{H}_{30}\text{N}_2$  575.2487, found 575.2488.

**1-(5,6,7,8-Tetrakis(4-chlorophenyl)naphthalen-1-yl)-1H-pyrazole (3e)**
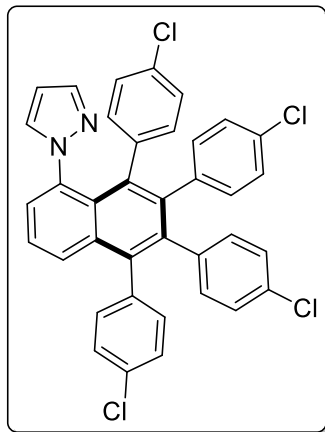

Yellow solid, eluent: (hexane/EtOAc, 95:5), m.p. 282-284 °C, yield: (129 mg, 73%). **<sup>1</sup>H NMR (300 MHz, CDCl<sub>3</sub>)** δ 7.71 (d, *J* = 7.8 Hz, 1H), 7.50 – 7.42 (m, 2H), 7.29 – 7.27 (m, 3H), 7.16 – 7.11 (m, 3H), 6.92 – 6.67 (m, 10H), 6.56 (s, 2H), 5.88 (d, *J* = 1.8 Hz, 1H) ppm. **<sup>13</sup>C NMR (75 MHz, CDCl<sub>3</sub>)** δ 140.7, 140.3, 138.4, 138.1, 138.0, 137.4, 134.3, 133.2, 132.3, 132.2, 132.1, 131.9, 131.6, 128.7, 128.2, 127.9, 127.3, 127.0, 126.5, 125.5, 106.3 ppm. **HRMS (ESI-TOF) m/z:** [M + H]<sup>+</sup> Calcd for C<sub>37</sub>H<sub>22</sub>Cl<sub>4</sub>N<sub>2</sub> 635.0615, found 635.0614.

**1-(5,6,7,8-Tetrakis(4-fluorophenyl)naphthalen-1-yl)-1H-pyrazole (3f)**
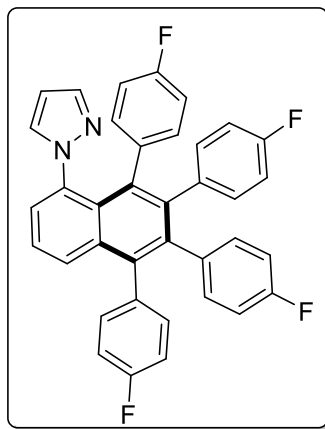

White solid, eluent: (hexane/EtOAc, 95:5), m.p. 222-227 °C, yield: (109 mg, 69%). **<sup>1</sup>H NMR (300 MHz, CDCl<sub>3</sub>)** δ 7.74 (dd, *J*<sub>1</sub> = 7.8 Hz, *J*<sub>2</sub> = 1.8 Hz, 1H), 7.50 – 7.42 (m, 2H), 7.27 (s, 1H), 7.18 – 7.14 (m, 3H), 7.02 – 6.96 (m, 2H), 6.79 – 6.69 (m, 4H), 6.64 – 6.47 (m, 8H), 5.87 (d, *J* = 1.8 Hz, 1H) ppm. **<sup>13</sup>C NMR (75 MHz, CDCl<sub>3</sub>)** δ 161.8 (d, *J*<sub>CF</sub> = 245.2 Hz), 160.9 (d, *J*<sub>CF</sub> = 244.5 Hz), 160.8 (d, *J*<sub>CF</sub> = 243.0 Hz), 160.7 (d, *J*<sub>CF</sub> = 243.7 Hz), 141.5, 140.2, 139.1, 138.2 (d, *J*<sub>CF</sub> =



22.5 Hz), 136.8, 136.0, 135.9 (2C), 135.8 (d,  $J_{CF} = 3.7$  Hz), 135.2, 135.1 (d,  $J_{CF} = 3.7$  Hz), 134.4, 132.7, 132.6, 132.5, 132.3, 132.2, 132.1, 128.8, 128.0, 127.9, 125.3, 114.9 (d,  $J_{CF} = 21.7$  Hz), 114.1, 113.8, 113.5, 113.2 (d,  $J_{CF} = 21.0$  Hz), 106.2 ppm. **HRMS (ESI-TOF) m/z:**  $[M + H]^+$  Calcd for  $C_{37}H_{22}F_4N_2$  571.1797, found 571.1801.  **$^{19}F$  NMR (471 MHz,  $CDCl_3$ )**  $\delta$  -114.99 (s), -116.17 (s), -116.53 (s), -117.25 (s) ppm.

### 1-(5,6,7,8-Tetrakis(4-methoxyphenyl)naphthalen-1-yl)-1H-pyrazole (3g)

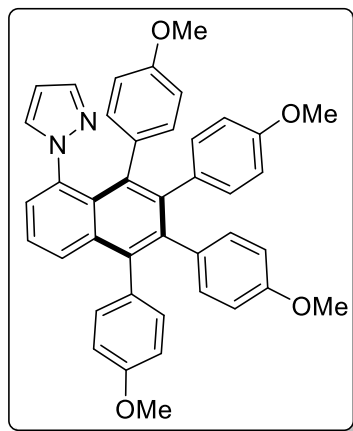

Brown solid, eluent: (hexane/EtOAc, 80:20), m.p. 106-108 °C, yield: (94 mg, 55%).  **$^1H$  NMR (500 MHz,  $CDCl_3$ )**  $\delta$  7.67 (dd,  $J = 10.5, 6.5$  Hz, 1H), 7.31 (d,  $J = 3.7$  Hz, 2H), 7.18 (d,  $J = 5.7$  Hz, 2H), 7.04 (t,  $J = 8.0$  Hz, 3H), 6.72 (d,  $J = 8.4$  Hz, 2H), 6.61 (d,  $J = 8.2$  Hz, 3H), 6.55 (s, 1H), 6.43 (d,  $J = 8.4$  Hz, 2H), 6.33 (d,  $J = 8.3$  Hz, 2H), 6.26 (t,  $J = 8.9$  Hz, 3H), 5.70 (s, 1H), 3.72 (s, 3H), 3.58 (s, 3H), 3.54 (s, 3H), 3.52 (s, 3H) ppm.  **$^{13}C$  NMR (75 MHz,  $CDCl_3$ )**  $\delta$  158.4, 158.2, 157.1, 156.9, 142.5, 140.1, 140.0, 139.8, 138.5, 137.9, 135.9, 134.7, 133.2, 133.0, 132.8, 132.6, 132.3, 132.2, 132.1, 132.0, 131.8, 128.8, 127.3, 124.4, 113.6, 113.4, 113.2, 112.7, 112.4, 112.2, 112.0, 105.8, 55.1 (2C), 54.9 (2C) ppm. **HRMS (ESI-TOF) m/z:**  $[M + H]^+$  Calcd for  $C_{41}H_{34}N_2O_4$  619.2597, found 619.2562.

### 1-(5,6,7,8-Tetrakis(4-(methylthio)phenyl)naphthalen-1-yl)-1H-pyrazole (3h)

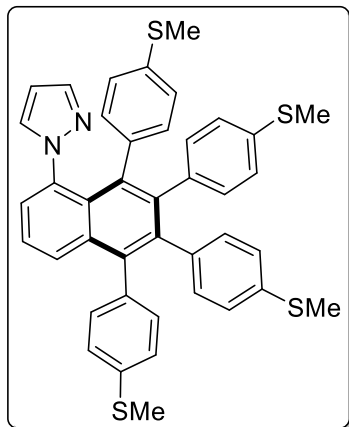

Brown solid, eluent: (hexane/EtOAc, 95:5), m.p. 184-186 °C, yield: (112 mg, 59%). **<sup>1</sup>H NMR (300 MHz, CDCl<sub>3</sub>)** δ 7.75 (dd,  $J_1 = 6.3$  Hz,  $J_2 = 3.3$ Hz, 1H), 7.43 – 7.41 (m, 2H), 7.27 – 7.7.25 (m, 2H), 7.19 – 7.10 (m, 5H), 6.81 – 6.67 (m, 10H), 6.54 – 6.52 (m, 1H), 5.81 (s, 1H), 2.49 (s, 3H), 2.35 (s, 3H), 2.32 (s, 3H), 2.29 (s, 3H) ppm. **<sup>13</sup>C NMR (75 MHz, CDCl<sub>3</sub>)** δ 141.6, 140.0, 139.2, 138.4, 137.9, 137.1, 136.8, 136.2, 135.9, 135.5, 135.2, 134.8, 134.5, 132.2, 131.6, 131.5, 131.3, 128.8, 127.7, 126.0, 125.7, 125.4 (2C), 124.9, 106.0, 16.6, 16.1, 15.9, 15.7 ppm. **HRMS (ESI-TOF) m/z:** [M + H]<sup>+</sup> Calcd for C<sub>41</sub>H<sub>34</sub>N<sub>2</sub>S<sub>4</sub> 683.1683, found 683.1686.

**Tetramethyl 3,3',3'',3'''-(5-(1H-pyrazol-1-yl)naphthalene-1,2,3,4-tetrayl)tetrabenzoate (3i)**

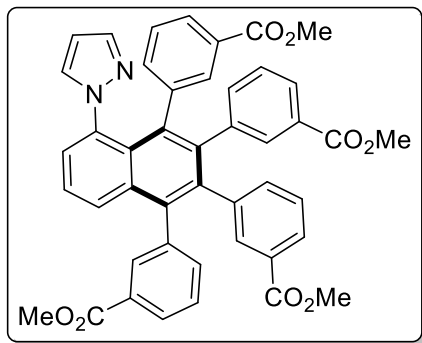

Yellow oil, eluent: (hexane/EtOAc, 70:30), yield: (116 mg, 57%). **<sup>1</sup>H NMR (300 MHz, CDCl<sub>3</sub>)** δ 7.90 (d,  $J = 6.6$  Hz, 2H), 7.72 (d,  $J = 7.5$  Hz, 1H), 7.49 – 7.39 (m, 10H), 7.28 – 7.17 (m, 2H), 7.03 – 6.84 (m, 6H), 5.74 (s, 1H), 3.89 (s, 3H), 3.84 (s, 3H), 3.77 (m, 6H) ppm. **<sup>13</sup>C NMR (75 MHz, CDCl<sub>3</sub>)** δ 166.8, 166.7, 166.5, 166.4, 141.2, 140.2, 139.7 (2C), 139.2, 139.0 (2C), 138.8, 138.4, 138.0, 135.2, 135.0, 134.1, 132.3, 132.2, 132.1 (2C), 132.0, 131.9, 130.0, 129.9, 128.9, 128.8, 128.6, 128.3, 128.0, 127.8, 127.2, 126.9, 126.8, 126.4, 126.3, 125.6, 106.4, 51.9 (2C), 51.7, 51.6 ppm. **HRMS (ESI-TOF) m/z:** [M + H]<sup>+</sup> Calcd for C<sub>45</sub>H<sub>34</sub>N<sub>2</sub>O<sub>8</sub> 731.2393, found 731.2388.

**1-(5,6,7,8-Tetrapropynaphthalen-1-yl)-1H-pyrazole (3j)**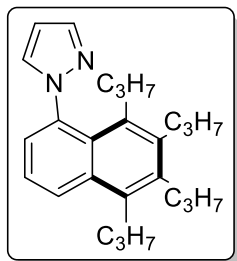

Brown oil, eluent: (hexane/EtOAc, 97:3), yield: (66 mg, 66%). **<sup>1</sup>H NMR (300 MHz, CDCl<sub>3</sub>)** δ 8.03 (d, *J* = 8.7 Hz, 1H), 7.66 – 7.65 (m, 1H), 7.54 – 7.53 (m, 1H), 7.29 (t, *J* = 7.2 Hz, 1H), 7.17 – 7.15 (m, 1H), 6.38 (t, *J* = 2.1 Hz, 1H), 2.99 2.94 (m, 2H), 2.69 – 2.58 (m, 4H), 1.66 – 1.46 (m, 10H), 1.07 – 0.94 (m, 9H), 0.55 (t, *J* = 7.2 Hz, 3H) ppm. **<sup>13</sup>C NMR (75 MHz, CDCl<sub>3</sub>)** δ 140.1, 139.9, 138.0, 137.3, 134.3, 134.2, 133.4, 131.9, 127.8, 126.3, 126.2, 123.1, 106.2, 32.9, 32.5, 31.8, 30.8, 26.5, 24.9, 24.7, 24.5, 14.9, 14.8, 14.7, 14.2 ppm. **HRMS (ESI-TOF) m/z:** [M + H]<sup>+</sup> Calcd for C<sub>25</sub>H<sub>34</sub>N<sub>2</sub> 363.2800, found 363.2777.

**1-(5,7-dimethyl-6,8-diphenylnaphthalen-1-yl)-1H-pyrazole (3k)**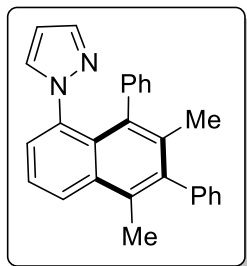

White solid, eluent: (hexane/EtOAc, 97:3), m.p. 113-116 °C, yield: (66 mg, 63%). **<sup>1</sup>H NMR (500 MHz, CDCl<sub>3</sub>)** δ 8.34 (dd, *J* = 8.5, 1.1 Hz, 1H), 7.60 (dd, *J* = 8.4, 7.3 Hz, 1H), 7.54 (t, *J* = 7.8 Hz, 2H), 7.46 (t, *J* = 7.4 Hz, 1H), 7.40 (dd, *J* = 7.1, 1.1 Hz, 1H), 7.34 (s, 2H), 7.29 (s, 2H), 7.18 – 7.14 (m, 2H), 7.09 (dd, *J* = 10.4, 4.3 Hz, 1H), 7.04 (s, 2H), 5.85 (t, *J* = 2.0 Hz, 1H), 2.55 (s, 3H), 1.70 (s, 3H) ppm. **<sup>13</sup>C NMR (75 MHz, CDCl<sub>3</sub>)** δ 142.2, 141.1, 140.7, 139.6, 137.8, 135.8, 134.8, 133.2, 132.5, 131.2, 128.5, 128.4, 128.1, 127.7, 127.1, 126.8, 126.2, 125.5, 124.1, 105.8, 20.2, 17.5 ppm. **HRMS (ESI-TOF) m/z:** [M + H]<sup>+</sup> Calcd for C<sub>27</sub>H<sub>22</sub>N<sub>2</sub> 375.1861, found 375.1835.

**1-(5,7-diethyl-6,8-diphenylnaphthalen-1-yl)-1H-pyrazole (3l)**

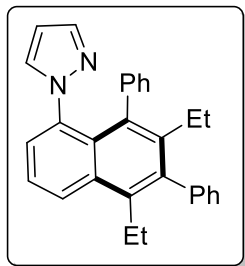

White solid, eluent: (hexane/EtOAc, 97:3), m.p. 147-150 °C, yield: (67 mg, 60%). **<sup>1</sup>H NMR (300 MHz, CDCl<sub>3</sub>)** δ 8.28 (d, *J* = 8.7 Hz, 1H), 7.53 – 7.37 (m, 4H), 7.28 – 7.52 (m, 5H), 7.07 – 7.05 (m, 5H), 5.79 (d, *J* = 1.8 Hz, 1H), 2.88 (q, *J* = 7.5 Hz, 2H), 2.10 (s, 2H), 1.20 (t, *J* = 7.5 Hz, 3H), 0.56 (t, *J* = 7.5 Hz, 3H) ppm. **<sup>13</sup>C NMR (75 MHz, CDCl<sub>3</sub>)** δ 141.9, 141.3, 140.2, 140.1, 139.5, 138.2, 138.1, 134.6, 132.4, 132.1, 129.7, 129.1, 127.9, 127.8, 127.5, 127.1, 126.8, 126.3, 125.5, 124.1, 105.8, 24.7, 23.8, 15.4, 14.9 ppm. **HRMS (ESI-TOF) m/z:** [M + H]<sup>+</sup> Calcd for C<sub>29</sub>H<sub>26</sub>N<sub>2</sub> 403.2174, found 403.2186.

### 2-(5,6,7,8-Tetraphenylnaphthalen-1-yl)imidazo[1,2-*a*]pyridine (5a)

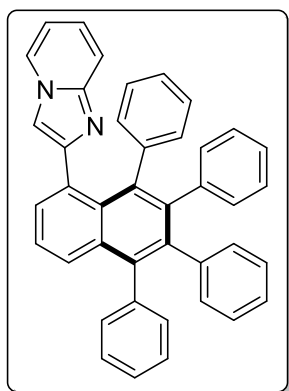

Brown solid, eluent: (hexane/EtOAc, 95:5), m.p. 203-206 °C, yield: (120 mg, 80%). **<sup>1</sup>H NMR (300 MHz, CDCl<sub>3</sub>)** δ 7.73 – 7.70 (m, 2H), 7.60 (dd, *J*<sub>1</sub> = 7.5 Hz, *J*<sub>2</sub> = 1.2 Hz, 1H), 7.46 – 7.41 (m, 1H), 7.36 – 7.34 (m, 1H), 7.27 – 7.16 (m, 5H), 7.0 (t, *J* = 7.8 Hz, 1H), 6.87 – 6.76 (m, 8H), 6.75 – 6.68 (m, 5H), 6.60 (t, *J* = 6.0 Hz, 1H), 6.52 (t, *J* = 7.2 Hz, 2H), 6.44 – 6.39 (m, 1H) ppm. **<sup>13</sup>C NMR (75 MHz, CDCl<sub>3</sub>)** δ 147.2, 143.6, 141.0, 140.8, 140.7, 140.1, 138.9, 138.7, 138.1, 133.7, 133.3, 131.9, 131.4 (2C), 131.2, 131.1, 128.0, 127.4, 126.4, 126.3, 126.1, 125.1, 124.9, 124.8, 124.6 (2C), 124.1, 123.4, 117.2, 112.4, 111.5 ppm. **HRMS (ESI-TOF) m/z:** [M + H]<sup>+</sup> Calcd for C<sub>41</sub>H<sub>28</sub>N<sub>2</sub> 549.2331, found 549.2327.

### 8-Methyl-2-(5,6,7,8-tetraphenylnaphthalen-1-yl)imidazo[1,2-*a*]pyridine (5b)

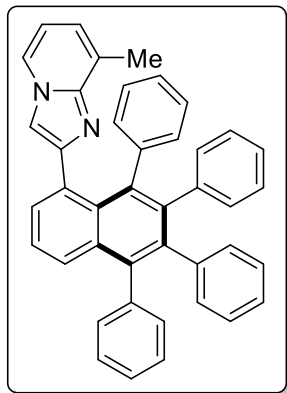

Brown solid, eluent: (hexane/EtOAc, 95:5), m.p. 228-231 °C, yield: (100 mg, 68%). **<sup>1</sup>H NMR (300 MHz, CDCl<sub>3</sub>)** δ 7.72 (d, *J* = 8.4 Hz, 1H), 7.63 – 7.57 (m, 2H), 7.45 – 7.40 (m, 1H), 7.26 – 7.18 (m, 5H), 6.95 (s, 1H), 6.85 – 6.81 (m, 8H), 6.75 – 6.67 (m, 5H), 6.55 – 6.45 (m, 3H), 6.40 – 6.35 (m, 1H), 2.48 (s, 3H) ppm. **<sup>13</sup>C NMR (75 MHz, CDCl<sub>3</sub>)** δ 146.9, 144.2, 140.9, 140.8 (2C), 140.2, 139.0, 138.7, 138.3, 133.8, 133.4, 132.0, 131.4, 131.2 (2C), 128.1, 127.4, 127.1, 126.4, 126.3, 126.1, 125.1, 124.8, 124.6, 124.5, 124.0, 122.5, 122.2, 112.7, 111.5, 17.0 ppm. **HRMS (ESI-TOF) m/z:** [M + H]<sup>+</sup> Calcd for C<sub>42</sub>H<sub>30</sub>N<sub>2</sub> 563.2487, found 563.2459.

#### 6-Methyl-2-(5,6,7,8-tetraphenyl-1-naphthyl)imidazo[1,2-*a*]pyridine (5c)

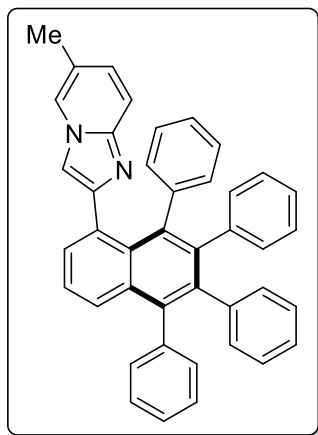

Brown solid, eluent: (hexane/EtOAc, 95:5), m.p. 218-220 °C, yield: (103 mg, 70%). **<sup>1</sup>H NMR (500 MHz, CDCl<sub>3</sub>)** δ 7.61 (dd, *J* = 8.5, 1.3 Hz, 1H), 7.50 (dd, *J* = 6.9, 1.2 Hz, 1H), 7.42 (s, 1H), 7.34 (dd, *J* = 8.5, 7.0 Hz, 1H), 7.19 (s, 1H), 7.18 – 7.13 (m, 4H), 7.13 – 7.09 (m, 1H), 6.81 (d, *J* = 9.2 Hz, 1H), 6.80 – 6.64 (m, 11H), 6.63 – 6.57 (m, 2H), 6.44 (t, *J* = 7.6 Hz, 2H), 6.33 (t, *J* = 7.4 Hz, 1H), 2.18 (s, 3H) ppm. **<sup>13</sup>C NMR (125 MHz, CDCl<sub>3</sub>)** δ 141.0, 140.7 (2C), 140.0, 138.9, 138.6, 138.0, 133.6, 131.9, 131.4, 131.3, 131.2, 131.1, 128.0, 127.4, 126.8, 126.4, 126.3, 126.1,

125.1, 125.0, 124.9, 124.6, 124.2, 122.3, 116.4, 112.2, 17.5 ppm. **HRMS (ESI-TOF) m/z:** [M + H]<sup>+</sup> Calcd for C<sub>42</sub>H<sub>30</sub>N<sub>2</sub> 563.2487, found 563.2497.

**6-Chloro-2-(5,6,7,8-tetraphenylnaphthalen-1-yl)imidazo[1,2-a]pyridine (5d)**

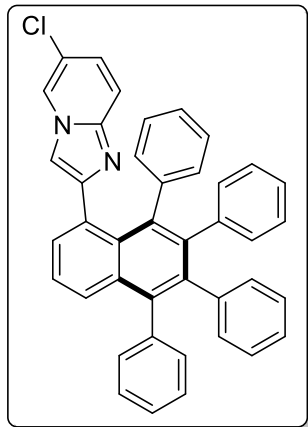

Brown solid, eluent: (hexane/EtOAc, 95:5), m.p. 98-100 °C, yield: (178 mg, 73%). **<sup>1</sup>H NMR (500 MHz, CDCl<sub>3</sub>)** δ 7.77 (d, *J* = 1.4 Hz, 1H), 7.71 (dd, *J* = 8.5, 1.2 Hz, 1H), 7.55 (dd, *J* = 6.9, 1.2 Hz, 1H), 7.42 (dd, *J* = 8.5, 7.0 Hz, 1H), 7.29 (d, *J* = 9.5 Hz, 1H), 7.26 (s, 1H), 7.23 (dd, *J* = 9.1, 4.0 Hz, 4H), 7.20 – 7.17 (m, 1H), 7.00 (dd, *J* = 9.5, 1.9 Hz, 2H), 6.85 (s, 1H), 6.83 (d, *J* = 3.3 Hz, 1H), 6.82 (d, *J* = 4.6 Hz, 1H), 6.79 (d, *J* = 1.6 Hz, 2H), 6.78 (d, *J* = 1.4 Hz, 2H), 6.76 – 6.74 (m, 1H), 6.74 (d, *J* = 1.8 Hz, 1H), 6.67 (dd, *J* = 7.0, 2.6 Hz, 2H), 6.54 (t, *J* = 7.5 Hz, 2H), 6.46 (t, *J* = 7.4 Hz, 1H) ppm. **<sup>13</sup>C NMR (125 MHz, CDCl<sub>3</sub>)** δ 141.9, 140.9 (2C), 140.6, 140.5, 139.9, 139.0, 138.7, 137.8, 133.6, 131.9, 131.3 (2C), 131.2, 131.1, 128.3, 127.5, 126.5, 126.4, 126.2, 125.2, 125.1, 125.0 (2C), 124.6, 124.4 (2C), 119.7, 117.5, 112.9 ppm. **HRMS (ESI-TOF) m/z:** [M + H]<sup>+</sup> Calcd for C<sub>41</sub>H<sub>27</sub>ClN<sub>2</sub> 583.1941, found 583.1955.

**6-Fluoro-2-(5,6,7,8-tetraphenylnaphthalen-1-yl)imidazo[1,2-a]pyridine (5e)**

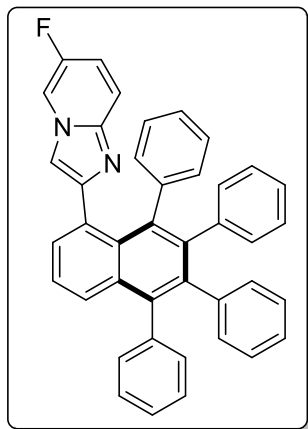

Brown solid, eluent: (hexane/EtOAc, 95:5), m.p. 206-210 °C, yield: (111 mg, 76%). **<sup>1</sup>H NMR (500 MHz, CDCl<sub>3</sub>)** δ 7.71 (dd, *J* = 8.5, 0.8 Hz, 1H), 7.67 – 7.64 (m, 1H), 7.58 – 7.53 (m, 1H), 7.42 (dd, *J* = 8.3, 7.1 Hz, 1H), 7.31 (dd, *J* = 9.7, 5.1 Hz, 1H), 7.25 – 7.21 (m, 4H), 7.21 – 7.17 (m, 1H), 6.97 (dd, *J* = 12.8, 5.1 Hz, 1H), 6.89 – 6.77 (m, 8H), 6.76 – 6.70 (m, 3H), 6.67 (dd, *J* = 6.9, 2.3 Hz, 2H), 6.53 (t, *J* = 7.5 Hz, 2H), 6.45 (t, *J* = 7.4 Hz, 1H) ppm. **<sup>13</sup>C NMR (125 MHz, CDCl<sub>3</sub>)** δ 153.0 (d, *J*<sub>CF</sub> = 236.8 Hz), 148.2 (2C), 141.2, 141.0, 140.9, 140.6 (d, *J*<sub>CF</sub> = 3.7 Hz), 139.9, 139.0, 138.7, 137.8, 133.6, 131.9, 131.3 (2C), 131.2, 131.1, 128.3, 127.5, 126.5, 126.4, 126.2, 125.2, 125.1, 125.0, 124.9, 124.3, 117.4 (d, *J*<sub>CF</sub> = 8.8 Hz), 115.5 (d, *J*<sub>CF</sub> = 20.1 Hz), 113.9, 111.3, 111.0 ppm. **HRMS (ESI-TOF) m/z:** [M + H]<sup>+</sup> Calcd for C<sub>41</sub>H<sub>27</sub>FN<sub>2</sub> 567.2237, found 567.2240. **<sup>19</sup>F NMR (471 MHz, CDCl<sub>3</sub>)** δ -141.63 (s) ppm.

**2-(5,6,7,8-Tetrakis(4-chlorophenyl)naphthalen-1-yl)imidazo[1,2-*a*]pyridine (5g)**

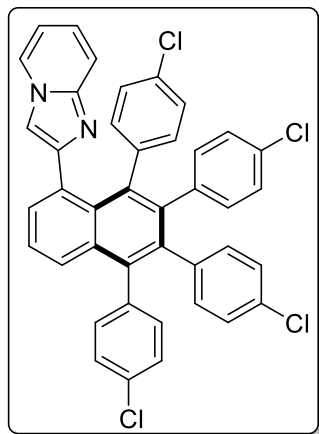

Yellow solid, eluent: (hexane/EtOAc, 95:5), m.p. 268-270 °C, yield: (145 mg, 77%). **<sup>1</sup>H NMR (300 MHz, CDCl<sub>3</sub>)** δ 7.85 (d, *J* = 6.6 Hz, 1H), 7.64 – 7.57 (m, 2H), 7.48 – 7.43 (m, 1H), 7.37 – 7.34 (m, 1H), 7.28 – 7.25 (m, 3H), 7.14 – 11 (m, 3H), 6.93 – 6.88 (m, 3H), 6.80 (d, *J* = 8.4 Hz, 2H), 6.70 – 6.67 (m, 5H), 6.59 – 6.51 (m, 3H) ppm. **<sup>13</sup>C NMR (75 MHz, CDCl<sub>3</sub>)** δ 147.0, 143.8, 139.4, 139.1, 138.5, 138.0, 137.9, 137.6, 133.6, 133.3, 132.9, 132.5, 132.3, 132.1, 139.1, 131.7, 131.4, 131.2, 128.1, 127.8, 127.2, 126.9, 125.4, 125.3, 124.8, 124.3, 117.1, 112.3, 111.8 ppm. **HRMS (ESI-TOF) m/z:** [M + H]<sup>+</sup> Calcd for C<sub>41</sub>H<sub>24</sub>Cl<sub>4</sub>N<sub>2</sub> 685.0772, found 685.0771.

**2-(5,6,7,8-Tetrakis(4-fluorophenyl)naphthalen-1-yl)imidazo[1,2-*a*]pyridine (5h)**

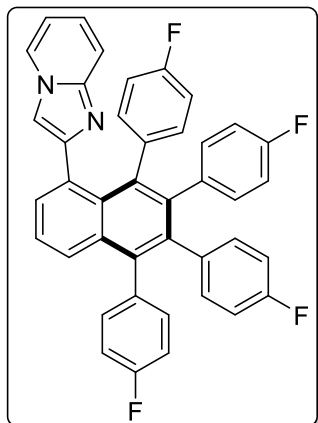

White solid, eluent: (hexane/EtOAc, 95:5), m.p. 186-188 °C, yield: (122 mg, 72%). **<sup>1</sup>H NMR (500 MHz, CDCl<sub>3</sub>)** δ 7.75 (d, *J* = 6.8 Hz, 1H), 7.59 (dd, *J* = 8.5, 1.3 Hz, 1H), 7.50 (dd, *J* = 6.9, 1.3 Hz, 1H), 7.37 (dd, *J* = 8.5, 7.0 Hz, 1H), 7.29 (d, *J* = 9.0 Hz, 1H), 7.19 (s, 1H), 7.10 – 7.06 (m, 2H), 7.05 – 7.01 (m, 1H), 6.92 – 6.87 (m, 3H), 6.63 (ddd, *J* = 7.1, 4.4, 2.0 Hz, 4H), 6.54 – 6.49 (m, 4H), 6.42 (t, *J* = 8.8 Hz, 2H), 6.17 (t, *J* = 8.8 Hz, 2H) ppm. **<sup>13</sup>C NMR (75 MHz, CDCl<sub>3</sub>)** δ 161.6 (d, *J*<sub>CF</sub> = 245.2 Hz), 160.7 (d, *J*<sub>CF</sub> = 244.5 Hz), 160.6 (d, *J*<sub>CF</sub> = 243.0 Hz), 160.4 (d, *J*<sub>CF</sub> = 243.7 Hz), 147.2, 143.8, 140.0, 138.2 (d, *J*<sub>CF</sub> = 3.7 Hz), 137.7, 136.7 (d, *J*<sub>CF</sub> = 3.7 Hz), 136.3 (2C), 136.2, 135.6 (d, *J*<sub>CF</sub> = 3.7 Hz), 133.8, 133.3, 133.2, 133.1, 132.8, 132.7, 132.6, 132.5, 132.4, 132.3, 131.5, 127.8, 125.0, 124.6, 124.1, 117.1, 114.7 (d, *J*<sub>CF</sub> = 21.7 Hz), 113.9, 113.7, 113.6, 113.4, 112.1, 112.0, 111.8 ppm. **HRMS (ESI-TOF) m/z:** [M + H]<sup>+</sup> Calcd for C<sub>41</sub>H<sub>24</sub>F<sub>4</sub>N<sub>2</sub> 621.1954, found 621.1915. **<sup>19</sup>F NMR (471 MHz, CDCl<sub>3</sub>)** δ -115.47 (s), -116.57 (s), -116.92 (s), -117.56 (s) ppm.

**2-(5,6,7,8-Tetrakis(4-methoxyphenyl)naphthalen-1-yl)imidazo[1,2-*a*]pyridine (5i)**

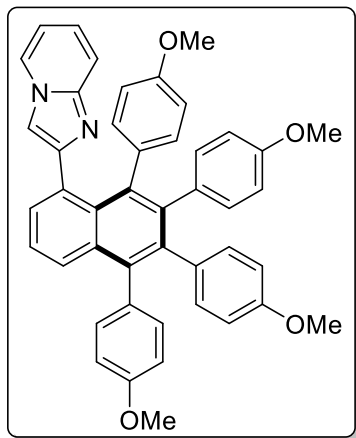



Brown solid, eluent: (hexane/EtOAc, 80:20), m.p. 140-142 °C, yield: (125 mg, 68%). **<sup>1</sup>H NMR (500 MHz, CDCl<sub>3</sub>)** δ 7.69 (d, *J* = 6.8 Hz, 1H), 7.64 (dd, *J* = 8.5, 1.3 Hz, 1H), 7.49 (dd, *J* = 6.9, 1.3 Hz, 1H), 7.33 – 7.30 (m, 1H), 7.19 (s, 2H), 7.04 (d, *J* = 8.7 Hz, 3H), 6.76 – 6.72 (m, 3H), 6.60 (d, *J* = 8.7 Hz, 4H), 6.48 (d, *J* = 8.8 Hz, 2H), 6.34 (d, *J* = 8.8 Hz, 2H), 6.26 (d, *J* = 8.8 Hz, 2H), 6.01 (d, *J* = 8.7 Hz, 2H), 3.73 (s, 3H), 3.55 (s, 3H), 3.50 (s, 3H), 3.27 (s, 3H) ppm. **<sup>13</sup>C NMR (75 MHz, CDCl<sub>3</sub>)** δ 157.9, 156.7, 147.3, 143.4, 140.9, 139.2, 138.4, 137.7, 133.9, 133.5, 133.4, 132.8, 132.6, 132.3, 132.2, 132.0, 131.5, 131.1, 128.0, 124.5, 124.2, 123.3, 117.0, 113.5, 113.0, 112.3, 112.1, 111.8, 111.5, 110.8, 55.1, 55.0, 54.8, 54.6 ppm. **HRMS (ESI-TOF) m/z:** [M + H]<sup>+</sup> Calcd for C<sub>45</sub>H<sub>36</sub>N<sub>2</sub>O<sub>4</sub> 669.2753, found 669.2719.

**2-(5,6,7,8-Tetrakis(4-(methylthio)phenyl)naphthalen-1-yl)imidazo[1,2-*a*]pyridine (5j)**

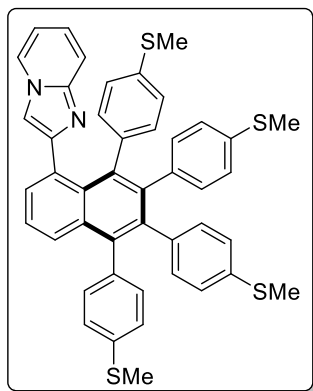

Yellow solid, eluent: (hexane/EtOAc, 90:10), m.p. 196-198 °C, yield: (141 mg, 70%). **<sup>1</sup>H NMR (500 MHz, CDCl<sub>3</sub>)** δ 7.77 (d, *J* = 6.7 Hz, 1H), 7.65 – 7.61 (m, 1H), 7.49 (dd, *J* = 6.9, 1.1 Hz, 1H), 7.34 (dd, *J* = 8.5, 7.0 Hz, 1H), 7.19 (s, 1H), 7.06 (dd, *J* = 18.2, 8.4 Hz, 6H), 6.80 (s, 1H), 6.70 (d, *J* = 8.4 Hz, 2H), 6.65 – 6.59 (m, 6H), 6.49 (d, *J* = 8.3 Hz, 2H), 6.38 (d, *J* = 8.3 Hz, 2H), 2.41 (s, 3H), 2.24 (s, 3H), 2.19 (s, 3H), 2.00 (s, 3H) ppm. **<sup>13</sup>C NMR (75 MHz, CDCl<sub>3</sub>)** δ 143.1, 140.4, 138.5, 138.4, 138.0, 137.5, 136.7 (2C), 135.2, 135.0, 134.9, 133.8, 132.2, 132.0, 131.8, 131.7, 131.5, 131.4, 131.3, 128.5, 128.3, 126.0, 125.6, 125.4, 125.3, 124.8, 124.5, 124.1, 116.8, 112.4, 112.2, 16.1, 15.9 (2C), 15.8 ppm. **HRMS (ESI-TOF) m/z:** [M + H]<sup>+</sup> Calcd for C<sub>45</sub>H<sub>36</sub>N<sub>2</sub>S<sub>4</sub> 733.1840, found 733.1787.

**2-(5,6,7,8-Tetrapropynaphthalen-1-yl)imidazo[1,2-a]pyridine (5k)**
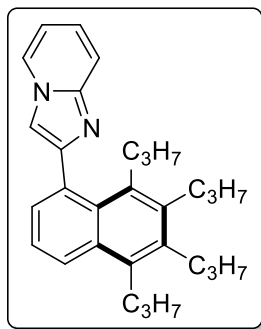

Brown oil, eluent: (hexane/EtOAc, 97:3), yield: (85 mg, 52%). **<sup>1</sup>H NMR (300 MHz, CDCl<sub>3</sub>)** δ 8.05 (d, *J* = 6.6 Hz, 1H), 7.99 – 7.96 (m, 1H), 7.54 (d, *J* = 9.0 Hz, 1H), 7.49 (s, 1H), 7.28 – 7.26 (m, 2H), 7.09 (t, *J* = 7.8 Hz, 1H), 6.71 (t, *J* = 6.9 Hz, 1H), 3.0 – 2.94 (m, 2H), 2.69 – 2.58 (m, 4H), 2.39 – 2.33 (m, 2H), 1.67 – 1.43 (m, 8H), 1.06 – 1.02 (m, 6H), 0.99 – 0.93 (m, 3H), 6.31 (t, *J* = 7.2 Hz, 3H) ppm. **<sup>13</sup>C NMR (75 MHz, CDCl<sub>3</sub>)** δ 150.3, 144.3, 138.7, 137.0, 135.7, 134.1, 132.6, 131.6, 130.8, 130.3, 125.3, 125.1, 124.1, 122.8, 117.6, 112.1, 110.1, 32.8, 32.7, 32.3, 31.7, 25.3, 24.9, 24.7, 24.5, 14.9, 14.8, 14.7, 14.0 ppm. **HRMS (ESI-TOF) m/z:** [M + H]<sup>+</sup> Calcd for C<sub>29</sub>H<sub>36</sub>N<sub>2</sub> 413.2957, found 413.2963.

**2-(5,7-dimethyl-6,8-diphenylnaphthalen-1-yl)imidazo[1,2-a]pyridine (5l) and 2-(5,8-dimethyl-6,7-diphenylnaphthalen-1-yl)imidazo[1,2-a]pyridine (5l')**
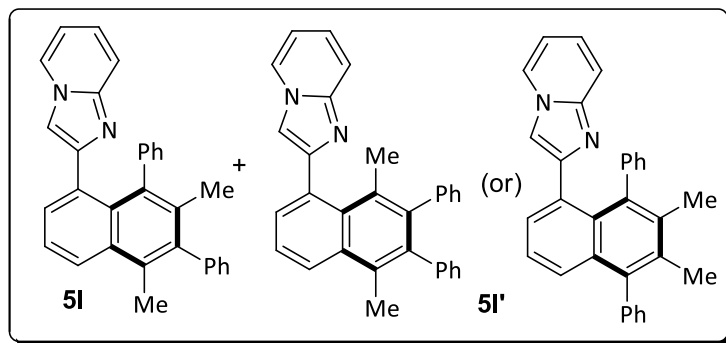

Brown solid, eluent: (hexane/EtOAc, 95:5), m.p. 118-120 °C, yield: (72 mg, 62%). **<sup>1</sup>H NMR (500 MHz, CDCl<sub>3</sub>)** δ 8.16 – 8.14 (m, 1H), 8.08 – 8.04 (m, 2H), 7.90-7.88 (m, 1H), 7.79 (s, 0.6 H), 7.59-7.55 (m, 5H), 7.51-7.47 (m, 1H), 7.44-7.41 (m, 2.5), 7.39-7.30 (m, 4.5H), 7.28-7.20 (m, 2H), 7.18 (s, 1H), 7.16-7.15 (m, 2H), 7.12-7.09 (m, 2.6H), 7.07-7.04 (m, 2H), 7.01-6.97 (m, 3H), 6.93-6.88 (m, 5H), 6.74-6.71 (m, 2H), 2.40 (s, 3H), 2.42 (s, 3H), 1.76 (s, 3H), 1.75 (s, 3H), 1.73 (s, 3H) ppm. **<sup>13</sup>C NMR (125 MHz, CDCl<sub>3</sub>)** δ 162.6, 161.6, 161.5 (2C), 160.6, 159.7, 159.5 (2C), 148.2, 147.0, 146.3, 140.1, 138.2 (2C), 137.6, 136.8 (2C), 136.3, 136.2 (3C), 135.5

(2C), 133.8, 133.3, 133.2, 132.7 (2C), 132.5 (2C), 132.3 (2C), 131.8, 131.5, 131.4, 129.8, 128.0, 126.0, 125.1, 124.6, 124.3, 114.8, 114.7, 113.9, 113.8, 113.7, 113.5, 112.1, 112.1, 112.0, 110.2, 31.4, 30.1, 29.6 (2C) ppm. **HRMS (ESI-TOF) m/z:**  $[M + H]^+$  Calcd for  $C_{31}H_{24}N_2$  425.2018, found 425.2019.

**2-(5,6,7,8-Tetraphenylnaphthalen-1-yl)benzo[d]imidazo[2,1-b]thiazole (7a)**

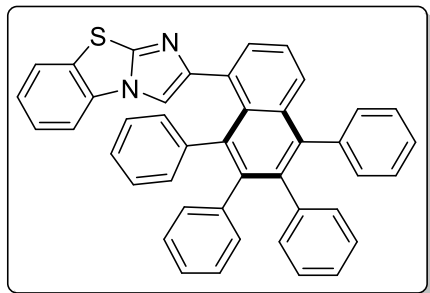

Brown solid, eluent: (hexane/EtOAc, 95:5), m.p. 236-238 °C, yield: (100 mg, 73%). **<sup>1</sup>H NMR (300 MHz, CDCl<sub>3</sub>)** δ 7.73 – 7.70 (m, 1H), 7.65 – 7.63 (m, 2H), 7.45 – 7.22 (m, 9H), 6.96 – 6.94 (m, 2H), 6.87 – 6.80 (m, 7H), 6.75 – 6.58 (m, 2H), 6.55 – 6.34 (m, 1H) ppm. **<sup>13</sup>C NMR (75 MHz, CDCl<sub>3</sub>)** δ 148.3, 145.8, 141.2, 140.9, 140.7, 140.0, 139.0, 138.7, 138.1, 133.7, 132.9, 132.0, 131.4, 131.2, 131.1, 130.0, 128.1, 127.7, 127.6, 127.4, 126.4, 126.3, 126.1, 125.7, 125.1, 125.0, 124.9, 124.6, 124.2, 124.1, 124.0, 112.1, 110.7 ppm. **HRMS (ESI-TOF) m/z:**  $[M + H]^+$  Calcd for  $C_{43}H_{28}N_2S$  605.2051, found 605.2051.

**5-Methoxy-2-(5,6,7,8-tetraphenylnaphthalen-1-yl)benzo[d]imidazo[2,1-b]thiazole (7b)**

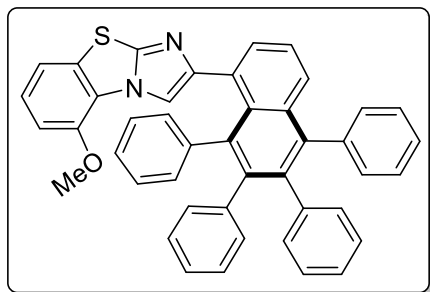

Brown solid, eluent: (hexane/EtOAc, 90:10), m.p. 194-197 °C, yield: (79 mg, 60%). **<sup>1</sup>H NMR (500 MHz, CDCl<sub>3</sub>)** δ 7.71 (dd,  $J = 8.5, 1.1$  Hz, 1H), 7.64 (d,  $J = 6.8$  Hz, 1H), 7.44 (dd,  $J = 8.4, 7.0$  Hz, 1H), 7.32 (s, 1H), 7.27 (dd,  $J = 5.2, 4.1$  Hz, 4H), 7.25 – 7.19 (m, 3H), 6.91 (dd,  $J = 6.4, 2.5$  Hz, 1H), 6.89 – 6.81 (m, 7H), 6.81 – 6.75 (m, 3H), 6.75 – 6.69 (m, 2H), 6.58 (t,  $J = 7.7$  Hz, 2H), 6.36 (t,  $J = 7.4$  Hz, 1H), 4.00 (s, 3H) ppm. **<sup>13</sup>C NMR (75 MHz, CDCl<sub>3</sub>)** δ 147.5, 147.3, 145.0, 141.2, 140.8, 140.2, 138.9, 138.7, 138.2, 133.7, 133.3, 132.0, 131.4, 131.2 (2C), 127.9,

127.4, 126.6, 126.4, 126.3, 126.1, 125.1, 125.0, 124.8, 124.6, 124.4, 124.0, 122.4, 115.9, 114.9, 113.4, 107.8, 56.0 ppm. **HRMS (ESI-TOF) m/z:**  $[M + H]^+$  Calcd for  $C_{44}H_{30}N_2OS$  635.2157, found 635.2123.

**6-(5,6,7,8-Tetraphenylnaphthalen-1-yl)imidazo[2,1-b]thiazole (7c)**

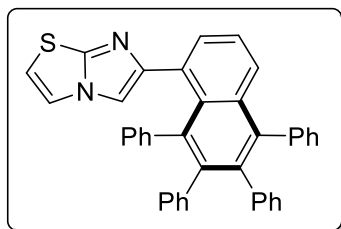

Brown solid, eluent: (hexane/EtOAc, 95:5), m.p. 138-142 °C, yield: (97 mg, 65%).  **$^1H$  NMR (500 MHz,  $CDCl_3$ )**  $\delta$  7.68 (dd,  $J = 8.5, 1.3$  Hz, 1H), 7.53 (dd,  $J = 6.9, 1.3$  Hz, 1H), 7.40 (dd,  $J = 8.5, 7.0$  Hz, 1H), 7.25 – 7.20 (m, 4H), 7.19 – 7.16 (m, 1H), 7.04 (d,  $J = 4.5$  Hz, 1H), 6.81 (ddd,  $J = 19.3, 9.5, 6.2$  Hz, 7H), 6.75 (td,  $J = 4.7, 2.3$  Hz, 4H), 6.70 – 6.67 (m, 2H), 6.66 – 6.56 (m, 4H) ppm.  **$^{13}C$  NMR (125 MHz,  $CDCl_3$ )**  $\delta$  141.15, 140.84, 140.72, 140.06, 138.92, 138.63, 138.11, 133.65, 133.12, 132.06, 131.40, 131.39, 131.30, 131.13, 128.10, 127.50, 126.47, 126.39, 126.16, 125.20, 124.90, 124.65, 124.10, 117.84, 111.66, 111.28 ppm. **HRMS (ESI-TOF) m/z:**  $[M + H]^+$  Calcd for  $C_{39}H_{26}N_2S$  555.1895, found 555.1904.

**2-(5,6,7,8-Tetrakis(4-chlorophenyl)naphthalen-1-yl)benzo[d]imidazo[2,1-b]thiazole (7d)**

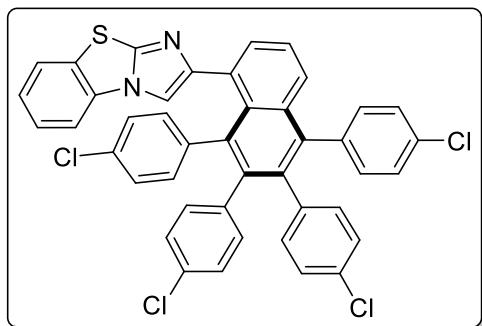

Brown solid, eluent: (hexane/EtOAc, 95:5), m.p. 288-290 °C, yield: (115 mg, 68%).  **$^1H$  NMR (300 MHz,  $CDCl_3$ )**  $\delta$  7.70 – 7.67 (m, 1H), 7.65 – 7.60 (m, 2H), 7.49 – 7.46 (m, 1H), 7.44 – 7.39 (m, 2H), 7.36 – 7.33 (m, 1H), 7.31 – 7.26 (m, 3H), 7.14 – 7.11 (m, 2H), 7.02 (s, 1H), 6.91 – 6.88 (m, 2H), 6.82 – 6.79 (m, 2H), 6.76 – 6.68 (m, 3H), 6.61 – 6.60 (m, 2H), 6.59 – 6.58 (m, 1H) ppm.  **$^{13}C$  NMR (75 MHz,  $CDCl_3$ )**  $\delta$  148.0, 146.5, 139.4, 139.0, 138.5, 138.1, 137.9, 137.5 (2C), 133.6, 133.0, 132.9, 132.4, 132.3, 132.1, 131.9 (2C), 131.7, 131.6, 131.3, 131.1, 130.0, 128.0,

127.9, 127.2, 126.9, 126.0, 125.4, 125.3, 124.6, 124.2, 112.2, 110.5 ppm. **HRMS (ESI-TOF)**  $m/z$ :  $[M + H]^+$  Calcd for  $C_{43}H_{24}Cl_4N_2S$  741.0493, found 741.0460.

**2-(5,6,7,8-Tetrakis(4-fluorophenyl)naphthalen-1-yl)benzo[d]imidazo[2,1-b]thiazole (7e)**

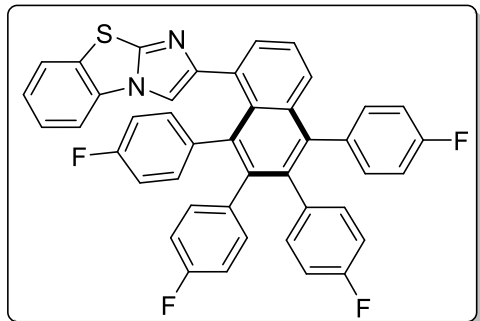

Brown solid, eluent: (hexane/EtOAc, 95:5), m.p. 216-219 °C, yield: (100 mg, 65%).  **$^1H$  NMR (500 MHz,  $CDCl_3$ )**  $\delta$  7.70 – 7.62 (m, 2H), 7.59 (dd,  $J$  = 6.9, 1.1 Hz, 1H), 7.45 (dd,  $J$  = 8.5, 7.0 Hz, 1H), 7.43 – 7.38 (m, 1H), 7.38 – 7.34 (m, 1H), 7.34 – 7.29 (m, 1H), 7.14 (td,  $J$  = 8.8, 5.9 Hz, 2H), 7.05 (s, 1H), 6.97 (t,  $J$  = 8.7 Hz, 2H), 6.77 (dd,  $J$  = 8.5, 5.6 Hz, 2H), 6.73 – 6.66 (m, 2H), 6.59 (ddd,  $J$  = 11.6, 7.0, 4.7 Hz, 4H), 6.50 (t,  $J$  = 8.7 Hz, 2H), 6.32 (t,  $J$  = 8.7 Hz, 2H) ppm.  **$^{13}C$  NMR (75 MHz,  $CDCl_3$ )**  $\delta$  161.6 (d,  $J_{CF}$  = 245.2 Hz), 160.7 (d,  $J_{CF}$  = 243.7 Hz), 160.6 (d,  $J_{CF}$  = 243.7 Hz) (2C), 148.1, 146.3, 140.2, 138.3 (d,  $J_{CF}$  = 2.8 Hz), 137.6, 136.8 (d,  $J_{CF}$  = 3.4 Hz), 136.3, 136.2 (2C), 135.5 (d,  $J_{CF}$  = 5.2 Hz), 133.3 (d,  $J_{CF}$  = 7.8 Hz), 132.7, 132.6 (2C), 132.5, 132.4, 132.3, 131.9, 131.6, 129.9, 128.1, 126.0, 125.1, 124.4 (d,  $J_{CF}$  = 28.2 Hz), 114.7 (d,  $J_{CF}$  = 21.2 Hz), 113.9, 113.7, 113.4, 112.2, 112.0, 111.9, 110.2 ppm. **HRMS (ESI-TOF)**  $m/z$ :  $[M + H]^+$  Calcd for  $C_{43}H_{24}F_4N_2S$  677.1675, found 677.1641.  **$^{19}F$  NMR (471 MHz,  $CDCl_3$ )**  $\delta$  -115.44 (s), -116.54 (s), -116.87 (s), -117.50 (s) ppm.

**4-Phenyl-1-(5,6,7,8-tetraphenyl)naphthalen-1-yl)-1H-1,2,3-triazole (9a)**

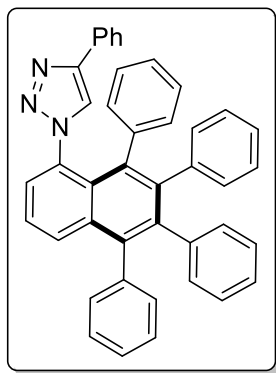

Yellow solid, eluent: (hexane/EtOAc, 95:5), m.p. 214-218 °C, yield: (112 mg, 78%). **<sup>1</sup>H NMR (300 MHz, CDCl<sub>3</sub>)** δ 7.92 (dd, J = 6.3 Hz, J = 3.0 Hz, 1H), 7.58 – 7.53 (m, 2H), 7.50 – 7.48 (m, 2H), 7.40 – 7.27 (m, 9H), 6.68 – 6.85 (m, 7H), 6.78 – 6.68 (m, 7H), 6.62 – 6.59 (m, 1H) ppm. **<sup>13</sup>C NMR (75 MHz, CDCl<sub>3</sub>)** δ 146.8, 142.9, 140.3, 140.0, 139.8, 139.3, 139.1, 138.9, 135.9, 134.2, 134.1, 131.2, 131.0, 130.9, 130.7, 130.6, 130.5, 128.5, 127.9, 127.7, 127.6, 127.5, 126.8, 126.6, 126.3, 125.8 (2C), 125.5, 125.3, 124.7, 123.8 ppm. **HRMS (ESI-TOF) m/z:** [M + H]<sup>+</sup> Calcd for C<sub>42</sub>H<sub>29</sub>N<sub>3</sub> 576.2440, found 576.2446.

**Table S1.** Crystal data and structure refinement for **3k**.

|                                   |                                                |                    |
|-----------------------------------|------------------------------------------------|--------------------|
| Identification code               | KP-TS-526                                      |                    |
| CCDC Number                       | 2143782                                        |                    |
| Empirical formula                 | C <sub>27</sub> H <sub>22</sub> N <sub>2</sub> |                    |
| Formula weight                    | 374.46                                         |                    |
| Temperature                       | 297(2) K                                       |                    |
| Wavelength                        | 1.54178 Å                                      |                    |
| Crystal system                    | Monoclinic                                     |                    |
| Space group                       | P 21/n                                         |                    |
| Unit cell dimensions              | a = 12.0767(4) Å                               | a = 90°.           |
|                                   | b = 7.7890(2) Å                                | b = 101.9960(10)°. |
|                                   | c = 22.3524(6) Å                               | g = 90°.           |
| Volume                            | 2056.67(10) Å <sup>3</sup>                     |                    |
| Z                                 | 4                                              |                    |
| Density (calculated)              | 1.209 Mg/m <sup>3</sup>                        |                    |
| Absorption coefficient            | 0.542 mm <sup>-1</sup>                         |                    |
| F(000)                            | 792                                            |                    |
| Crystal size                      | 0.320 x 0.260 x 0.170 mm <sup>3</sup>          |                    |
| Theta range for data collection   | 3.866 to 70.148°.                              |                    |
| Index ranges                      | -14 ≤ h ≤ 14, -9 ≤ k ≤ 9, -27 ≤ l ≤ 27         |                    |
| Reflections collected             | 48923                                          |                    |
| Independent reflections           | 3887 [R(int) = 0.0586]                         |                    |
| Completeness to theta = 67.679°   | 99.5 %                                         |                    |
| Absorption correction             | Semi-empirical from equivalents                |                    |
| Max. and min. transmission        | 0.753 and 0.594                                |                    |
| Refinement method                 | Full-matrix least-squares on F <sup>2</sup>    |                    |
| Data / restraints / parameters    | 3887 / 0 / 263                                 |                    |
| Goodness-of-fit on F <sup>2</sup> | 0.881                                          |                    |
| Final R indices [I > 2σ(I)]       | R1 = 0.0623, wR2 = 0.2130                      |                    |
| R indices (all data)              | R1 = 0.0675, wR2 = 0.2269                      |                    |
| Extinction coefficient            | 0.008(2)                                       |                    |
| Largest diff. peak and hole       | 0.261 and -0.278 e.Å <sup>-3</sup>             |                    |

**Table S2.** Atomic coordinates ( $\times 10^4$ ) and equivalent isotropic displacement parameters ( $\text{\AA}^2 \times 10^3$ ) for 526\_sx.  $U(\text{eq})$  is defined as one third of the trace of the orthogonalized  $U^{ij}$  tensor.

|       | x       | y        | z       | $U(\text{eq})$ |
|-------|---------|----------|---------|----------------|
| C(1)  | 4846(1) | 3698(2)  | 1902(1) | 61(1)          |
| C(2)  | 3978(1) | 2860(2)  | 1508(1) | 59(1)          |
| C(3)  | 3521(1) | 1308(2)  | 1703(1) | 59(1)          |
| C(4)  | 2530(2) | 457(2)   | 1371(1) | 66(1)          |
| C(5)  | 2197(2) | -1104(3) | 1549(1) | 77(1)          |
| C(6)  | 2798(2) | -1905(3) | 2071(1) | 82(1)          |
| C(7)  | 3695(2) | -1086(2) | 2431(1) | 75(1)          |
| C(8)  | 4070(1) | 537(2)   | 2267(1) | 62(1)          |
| C(9)  | 4973(2) | 1423(2)  | 2665(1) | 64(1)          |
| C(10) | 5315(1) | 2993(2)  | 2490(1) | 61(1)          |
| C(11) | 6228(1) | 3981(2)  | 2911(1) | 62(1)          |
| C(12) | 7363(2) | 3719(3)  | 2906(1) | 74(1)          |
| C(13) | 8194(2) | 4654(3)  | 3293(1) | 83(1)          |
| C(14) | 7898(2) | 5840(3)  | 3689(1) | 83(1)          |
| C(15) | 6771(2) | 6112(3)  | 3696(1) | 81(1)          |
| C(16) | 5945(2) | 5184(2)  | 3310(1) | 71(1)          |
| C(17) | 5524(2) | 623(3)   | 3264(1) | 87(1)          |
| C(18) | 3629(1) | 3517(2)  | 865(1)  | 63(1)          |
| C(19) | 4031(2) | 2691(3)  | 401(1)  | 78(1)          |
| C(20) | 3791(2) | 3343(4)  | -192(1) | 97(1)          |
| C(21) | 3167(2) | 4798(4)  | -329(1) | 100(1)         |
| C(22) | 2768(2) | 5623(3)  | 120(1)  | 100(1)         |
| C(23) | 2998(2) | 4981(3)  | 717(1)  | 82(1)          |
| C(24) | 5358(2) | 5329(3)  | 1716(1) | 77(1)          |
| C(25) | 1614(2) | 947(3)   | 269(1)  | 90(1)          |
| C(26) | 770(2)  | 2004(4)  | -16(1)  | 105(1)         |
| C(27) | 461(2)  | 2923(4)  | 447(1)  | 100(1)         |
| N(1)  | 1781(1) | 1285(2)  | 872(1)  | 71(1)          |
| N(2)  | 1064(1) | 2508(3)  | 992(1)  | 87(1)          |



**Table S4.** Bond lengths [ $\text{\AA}$ ] and angles [ $^\circ$ ] for **3k**.

---

|              |          |
|--------------|----------|
| C(1)-C(2)    | 1.384(2) |
| C(1)-C(10)   | 1.429(2) |
| C(1)-C(24)   | 1.509(2) |
| C(2)-C(3)    | 1.434(2) |
| C(2)-C(18)   | 1.501(2) |
| C(3)-C(8)    | 1.430(2) |
| C(3)-C(4)    | 1.432(2) |
| C(4)-C(5)    | 1.366(3) |
| C(4)-N(1)    | 1.436(2) |
| C(5)-C(6)    | 1.387(3) |
| C(5)-H(5)    | 0.9300   |
| C(6)-C(7)    | 1.366(3) |
| C(6)-H(6)    | 0.9300   |
| C(7)-C(8)    | 1.416(3) |
| C(7)-H(7)    | 0.9300   |
| C(8)-C(9)    | 1.433(3) |
| C(9)-C(10)   | 1.374(2) |
| C(9)-C(17)   | 1.501(3) |
| C(10)-C(11)  | 1.504(2) |
| C(11)-C(16)  | 1.385(3) |
| C(11)-C(12)  | 1.388(3) |
| C(12)-C(13)  | 1.387(3) |
| C(12)-H(12)  | 0.9300   |
| C(13)-C(14)  | 1.378(3) |
| C(13)-H(13)  | 0.9300   |
| C(14)-C(15)  | 1.381(3) |
| C(14)-H(14)  | 0.9300   |
| C(15)-C(16)  | 1.381(3) |
| C(15)-H(15)  | 0.9300   |
| C(16)-H(16)  | 0.9300   |
| C(17)-H(17A) | 0.9600   |
| C(17)-H(17B) | 0.9600   |
| C(17)-H(17C) | 0.9600   |
| C(18)-C(23)  | 1.373(3) |

|                  |            |
|------------------|------------|
| C(18)-C(19)      | 1.390(3)   |
| C(19)-C(20)      | 1.393(3)   |
| C(19)-H(19)      | 0.9300     |
| C(20)-C(21)      | 1.360(4)   |
| C(20)-H(20)      | 0.9300     |
| C(21)-C(22)      | 1.361(4)   |
| C(21)-H(21)      | 0.9300     |
| C(22)-C(23)      | 1.396(3)   |
| C(22)-H(22)      | 0.9300     |
| C(23)-H(23)      | 0.9300     |
| C(24)-H(24A)     | 0.9600     |
| C(24)-H(24B)     | 0.9600     |
| C(24)-H(24C)     | 0.9600     |
| C(25)-N(1)       | 1.347(3)   |
| C(25)-C(26)      | 1.361(4)   |
| C(25)-H(25)      | 0.9300     |
| C(26)-C(27)      | 1.373(4)   |
| C(26)-H(26)      | 0.9300     |
| C(27)-N(2)       | 1.322(3)   |
| C(27)-H(27)      | 0.9300     |
| N(1)-N(2)        | 1.350(3)   |
| C(2)-C(1)-C(10)  | 120.46(15) |
| C(2)-C(1)-C(24)  | 121.49(15) |
| C(10)-C(1)-C(24) | 118.00(15) |
| C(1)-C(2)-C(3)   | 119.52(15) |
| C(1)-C(2)-C(18)  | 118.21(14) |
| C(3)-C(2)-C(18)  | 121.96(14) |
| C(8)-C(3)-C(4)   | 116.50(15) |
| C(8)-C(3)-C(2)   | 119.05(14) |
| C(4)-C(3)-C(2)   | 124.45(15) |
| C(5)-C(4)-C(3)   | 121.76(17) |
| C(5)-C(4)-N(1)   | 116.75(16) |
| C(3)-C(4)-N(1)   | 121.20(16) |
| C(4)-C(5)-C(6)   | 120.70(18) |
| C(4)-C(5)-H(5)   | 119.6      |
| C(6)-C(5)-H(5)   | 119.6      |

|                     |            |
|---------------------|------------|
| C(7)-C(6)-C(5)      | 119.87(18) |
| C(7)-C(6)-H(6)      | 120.1      |
| C(5)-C(6)-H(6)      | 120.1      |
| C(6)-C(7)-C(8)      | 121.40(19) |
| C(6)-C(7)-H(7)      | 119.3      |
| C(8)-C(7)-H(7)      | 119.3      |
| C(7)-C(8)-C(3)      | 119.28(16) |
| C(7)-C(8)-C(9)      | 120.81(16) |
| C(3)-C(8)-C(9)      | 119.89(15) |
| C(10)-C(9)-C(8)     | 119.16(15) |
| C(10)-C(9)-C(17)    | 121.30(16) |
| C(8)-C(9)-C(17)     | 119.54(16) |
| C(9)-C(10)-C(1)     | 121.27(15) |
| C(9)-C(10)-C(11)    | 120.16(15) |
| C(1)-C(10)-C(11)    | 118.54(15) |
| C(16)-C(11)-C(12)   | 118.72(16) |
| C(16)-C(11)-C(10)   | 120.10(15) |
| C(12)-C(11)-C(10)   | 121.18(16) |
| C(13)-C(12)-C(11)   | 120.40(19) |
| C(13)-C(12)-H(12)   | 119.8      |
| C(11)-C(12)-H(12)   | 119.8      |
| C(14)-C(13)-C(12)   | 120.17(19) |
| C(14)-C(13)-H(13)   | 119.9      |
| C(12)-C(13)-H(13)   | 119.9      |
| C(13)-C(14)-C(15)   | 119.85(19) |
| C(13)-C(14)-H(14)   | 120.1      |
| C(15)-C(14)-H(14)   | 120.1      |
| C(16)-C(15)-C(14)   | 120.0(2)   |
| C(16)-C(15)-H(15)   | 120.0      |
| C(14)-C(15)-H(15)   | 120.0      |
| C(15)-C(16)-C(11)   | 120.90(18) |
| C(15)-C(16)-H(16)   | 119.6      |
| C(11)-C(16)-H(16)   | 119.5      |
| C(9)-C(17)-H(17A)   | 109.5      |
| C(9)-C(17)-H(17B)   | 109.5      |
| H(17A)-C(17)-H(17B) | 109.5      |

|                     |            |
|---------------------|------------|
| C(9)-C(17)-H(17C)   | 109.5      |
| H(17A)-C(17)-H(17C) | 109.5      |
| H(17B)-C(17)-H(17C) | 109.5      |
| C(23)-C(18)-C(19)   | 117.80(18) |
| C(23)-C(18)-C(2)    | 123.05(17) |
| C(19)-C(18)-C(2)    | 118.96(17) |
| C(18)-C(19)-C(20)   | 120.4(2)   |
| C(18)-C(19)-H(19)   | 119.8      |
| C(20)-C(19)-H(19)   | 119.8      |
| C(21)-C(20)-C(19)   | 120.9(2)   |
| C(21)-C(20)-H(20)   | 119.5      |
| C(19)-C(20)-H(20)   | 119.5      |
| C(20)-C(21)-C(22)   | 119.5(2)   |
| C(20)-C(21)-H(21)   | 120.3      |
| C(22)-C(21)-H(21)   | 120.3      |
| C(21)-C(22)-C(23)   | 120.3(2)   |
| C(21)-C(22)-H(22)   | 119.9      |
| C(23)-C(22)-H(22)   | 119.9      |
| C(18)-C(23)-C(22)   | 121.2(2)   |
| C(18)-C(23)-H(23)   | 119.4      |
| C(22)-C(23)-H(23)   | 119.4      |
| C(1)-C(24)-H(24A)   | 109.5      |
| C(1)-C(24)-H(24B)   | 109.5      |
| H(24A)-C(24)-H(24B) | 109.5      |
| C(1)-C(24)-H(24C)   | 109.5      |
| H(24A)-C(24)-H(24C) | 109.5      |
| H(24B)-C(24)-H(24C) | 109.5      |
| N(1)-C(25)-C(26)    | 107.0(2)   |
| N(1)-C(25)-H(25)    | 126.5      |
| C(26)-C(25)-H(25)   | 126.5      |
| C(25)-C(26)-C(27)   | 104.9(2)   |
| C(25)-C(26)-H(26)   | 127.6      |
| C(27)-C(26)-H(26)   | 127.6      |
| N(2)-C(27)-C(26)    | 112.5(2)   |
| N(2)-C(27)-H(27)    | 123.7      |
| C(26)-C(27)-H(27)   | 123.7      |

|                 |            |
|-----------------|------------|
| C(25)-N(1)-N(2) | 111.53(18) |
| C(25)-N(1)-C(4) | 129.01(19) |
| N(2)-N(1)-C(4)  | 119.29(15) |
| C(27)-N(2)-N(1) | 104.1(2)   |

---

**Table S5.** Anisotropic displacement parameters ( $\text{\AA}^2 \times 10^3$ ) for 526\_sx. The anisotropic displacement factor exponent takes the form:  $-2p^2 [ h^2 a^{*2} U^{11} + \dots + 2 h k a^* b^* U^{12} ]$

|       | U11    | U22    | U33   | U23    | U13    | U12    |
|-------|--------|--------|-------|--------|--------|--------|
| C(1)  | 61(1)  | 64(1)  | 56(1) | 2(1)   | 9(1)   | -2(1)  |
| C(2)  | 59(1)  | 62(1)  | 57(1) | 1(1)   | 10(1)  | -1(1)  |
| C(3)  | 59(1)  | 62(1)  | 57(1) | -2(1)  | 14(1)  | 0(1)   |
| C(4)  | 63(1)  | 70(1)  | 66(1) | -5(1)  | 16(1)  | -5(1)  |
| C(5)  | 73(1)  | 74(1)  | 86(1) | -6(1)  | 20(1)  | -14(1) |
| C(6)  | 87(1)  | 69(1)  | 92(1) | 5(1)   | 26(1)  | -15(1) |
| C(7)  | 84(1)  | 68(1)  | 74(1) | 9(1)   | 21(1)  | 0(1)   |
| C(8)  | 65(1)  | 62(1)  | 62(1) | 1(1)   | 17(1)  | 2(1)   |
| C(9)  | 67(1)  | 66(1)  | 58(1) | 3(1)   | 11(1)  | 5(1)   |
| C(10) | 61(1)  | 66(1)  | 57(1) | -1(1)  | 9(1)   | 2(1)   |
| C(11) | 60(1)  | 67(1)  | 56(1) | 4(1)   | 5(1)   | 2(1)   |
| C(12) | 65(1)  | 83(1)  | 72(1) | -3(1)  | 10(1)  | 5(1)   |
| C(13) | 59(1)  | 97(1)  | 88(1) | 6(1)   | 2(1)   | -2(1)  |
| C(14) | 77(1)  | 82(1)  | 79(1) | 0(1)   | -7(1)  | -11(1) |
| C(15) | 87(1)  | 77(1)  | 72(1) | -12(1) | 3(1)   | 1(1)   |
| C(16) | 67(1)  | 77(1)  | 67(1) | -4(1)  | 10(1)  | 3(1)   |
| C(17) | 95(1)  | 83(1)  | 74(1) | 17(1)  | -1(1)  | -4(1)  |
| C(18) | 61(1)  | 69(1)  | 57(1) | 3(1)   | 5(1)   | -9(1)  |
| C(19) | 78(1)  | 94(1)  | 62(1) | 0(1)   | 14(1)  | -5(1)  |
| C(20) | 97(2)  | 131(2) | 64(1) | 3(1)   | 20(1)  | -16(2) |
| C(21) | 97(2)  | 125(2) | 70(1) | 26(1)  | -2(1)  | -21(2) |
| C(22) | 102(2) | 90(2)  | 94(2) | 28(1)  | -12(1) | -3(1)  |
| C(23) | 86(1)  | 78(1)  | 74(1) | 5(1)   | 0(1)   | 3(1)   |
| C(24) | 79(1)  | 79(1)  | 68(1) | 11(1)  | 3(1)   | -18(1) |
| C(25) | 96(2)  | 103(2) | 68(1) | -14(1) | 9(1)   | -27(1) |
| C(26) | 94(2)  | 134(2) | 75(1) | 14(1)  | -13(1) | -38(2) |
| C(27) | 69(1)  | 133(2) | 93(2) | 28(2)  | 5(1)   | -2(1)  |
| N(1)  | 62(1)  | 83(1)  | 65(1) | -4(1)  | 7(1)   | -11(1) |
| N(2)  | 68(1)  | 110(1) | 82(1) | 12(1)  | 15(1)  | 12(1)  |

**Table S6.** Hydrogen coordinates ( $\times 10^4$ ) and isotropic displacement parameters ( $\text{\AA}^2 \times 10^3$ ) for **3k**.

|        | x    | y     | z    | U(eq) |
|--------|------|-------|------|-------|
| H(5)   | 1559 | -1636 | 1318 | 93    |
| H(6)   | 2591 | -2997 | 2175 | 98    |
| H(7)   | 4067 | -1605 | 2792 | 89    |
| H(12)  | 7568 | 2913  | 2642 | 89    |
| H(13)  | 8952 | 4479  | 3285 | 100   |
| H(14)  | 8457 | 6456  | 3952 | 99    |
| H(15)  | 6569 | 6921  | 3960 | 97    |
| H(16)  | 5187 | 5369  | 3318 | 85    |
| H(17A) | 5176 | -465  | 3307 | 130   |
| H(17B) | 6316 | 457   | 3274 | 130   |
| H(17C) | 5434 | 1366  | 3593 | 130   |
| H(19)  | 4462 | 1698  | 488  | 94    |
| H(20)  | 4062 | 2776  | -498 | 116   |
| H(21)  | 3014 | 5226  | -726 | 120   |
| H(22)  | 2341 | 6618  | 30   | 120   |
| H(23)  | 2719 | 5555  | 1019 | 98    |
| H(24A) | 5944 | 5718  | 2047 | 116   |
| H(24B) | 5674 | 5111  | 1363 | 116   |
| H(24C) | 4783 | 6194  | 1620 | 116   |
| H(25)  | 2001 | 144   | 82   | 108   |
| H(26)  | 468  | 2085  | -434 | 127   |
| H(27)  | -109 | 3747  | 385  | 120   |

**Table S7.** Torsion angles [°] for **3k**.

---

|                        |             |
|------------------------|-------------|
| C(10)-C(1)-C(2)-C(3)   | 2.4(2)      |
| C(24)-C(1)-C(2)-C(3)   | 179.64(16)  |
| C(10)-C(1)-C(2)-C(18)  | -171.43(15) |
| C(24)-C(1)-C(2)-C(18)  | 5.8(3)      |
| C(1)-C(2)-C(3)-C(8)    | -8.2(2)     |
| C(18)-C(2)-C(3)-C(8)   | 165.32(16)  |
| C(1)-C(2)-C(3)-C(4)    | 171.26(16)  |
| C(18)-C(2)-C(3)-C(4)   | -15.2(3)    |
| C(8)-C(3)-C(4)-C(5)    | -6.9(3)     |
| C(2)-C(3)-C(4)-C(5)    | 173.62(17)  |
| C(8)-C(3)-C(4)-N(1)    | 166.83(15)  |
| C(2)-C(3)-C(4)-N(1)    | -12.7(3)    |
| C(3)-C(4)-C(5)-C(6)    | 1.6(3)      |
| N(1)-C(4)-C(5)-C(6)    | -172.42(18) |
| C(4)-C(5)-C(6)-C(7)    | 3.8(3)      |
| C(5)-C(6)-C(7)-C(8)    | -3.5(3)     |
| C(6)-C(7)-C(8)-C(3)    | -2.1(3)     |
| C(6)-C(7)-C(8)-C(9)    | 176.67(19)  |
| C(4)-C(3)-C(8)-C(7)    | 7.0(2)      |
| C(2)-C(3)-C(8)-C(7)    | -173.47(15) |
| C(4)-C(3)-C(8)-C(9)    | -171.73(15) |
| C(2)-C(3)-C(8)-C(9)    | 7.8(2)      |
| C(7)-C(8)-C(9)-C(10)   | 179.89(16)  |
| C(3)-C(8)-C(9)-C(10)   | -1.4(3)     |
| C(7)-C(8)-C(9)-C(17)   | -0.2(3)     |
| C(3)-C(8)-C(9)-C(17)   | 178.47(17)  |
| C(8)-C(9)-C(10)-C(1)   | -4.7(3)     |
| C(17)-C(9)-C(10)-C(1)  | 175.48(18)  |
| C(8)-C(9)-C(10)-C(11)  | 177.50(15)  |
| C(17)-C(9)-C(10)-C(11) | -2.4(3)     |
| C(2)-C(1)-C(10)-C(9)   | 4.2(3)      |
| C(24)-C(1)-C(10)-C(9)  | -173.13(17) |
| C(2)-C(1)-C(10)-C(11)  | -177.88(15) |
| C(24)-C(1)-C(10)-C(11) | 4.7(2)      |



|                         |             |
|-------------------------|-------------|
| C(9)-C(10)-C(11)-C(16)  | -92.9(2)    |
| C(1)-C(10)-C(11)-C(16)  | 89.2(2)     |
| C(9)-C(10)-C(11)-C(12)  | 87.5(2)     |
| C(1)-C(10)-C(11)-C(12)  | -90.4(2)    |
| C(16)-C(11)-C(12)-C(13) | -0.3(3)     |
| C(10)-C(11)-C(12)-C(13) | 179.37(18)  |
| C(11)-C(12)-C(13)-C(14) | 0.6(3)      |
| C(12)-C(13)-C(14)-C(15) | -0.7(3)     |
| C(13)-C(14)-C(15)-C(16) | 0.6(3)      |
| C(14)-C(15)-C(16)-C(11) | -0.3(3)     |
| C(12)-C(11)-C(16)-C(15) | 0.2(3)      |
| C(10)-C(11)-C(16)-C(15) | -179.50(17) |
| C(1)-C(2)-C(18)-C(23)   | -75.3(2)    |
| C(3)-C(2)-C(18)-C(23)   | 111.1(2)    |
| C(1)-C(2)-C(18)-C(19)   | 99.6(2)     |
| C(3)-C(2)-C(18)-C(19)   | -74.1(2)    |
| C(23)-C(18)-C(19)-C(20) | -0.1(3)     |
| C(2)-C(18)-C(19)-C(20)  | -175.27(18) |
| C(18)-C(19)-C(20)-C(21) | 0.3(4)      |
| C(19)-C(20)-C(21)-C(22) | -0.3(4)     |
| C(20)-C(21)-C(22)-C(23) | 0.0(4)      |
| C(19)-C(18)-C(23)-C(22) | -0.1(3)     |
| C(2)-C(18)-C(23)-C(22)  | 174.83(19)  |
| C(21)-C(22)-C(23)-C(18) | 0.1(4)      |
| N(1)-C(25)-C(26)-C(27)  | -0.8(3)     |
| C(25)-C(26)-C(27)-N(2)  | 0.5(3)      |
| C(26)-C(25)-N(1)-N(2)   | 0.9(2)      |
| C(26)-C(25)-N(1)-C(4)   | 176.19(19)  |
| C(5)-C(4)-N(1)-C(25)    | -76.9(3)    |
| C(3)-C(4)-N(1)-C(25)    | 109.1(2)    |
| C(5)-C(4)-N(1)-N(2)     | 98.1(2)     |
| C(3)-C(4)-N(1)-N(2)     | -75.9(2)    |
| C(26)-C(27)-N(2)-N(1)   | 0.1(3)      |
| C(25)-N(1)-N(2)-C(27)   | -0.6(2)     |
| C(4)-N(1)-N(2)-C(27)    | -176.38(17) |

---

ORTEP crystal structure of compound **3k**

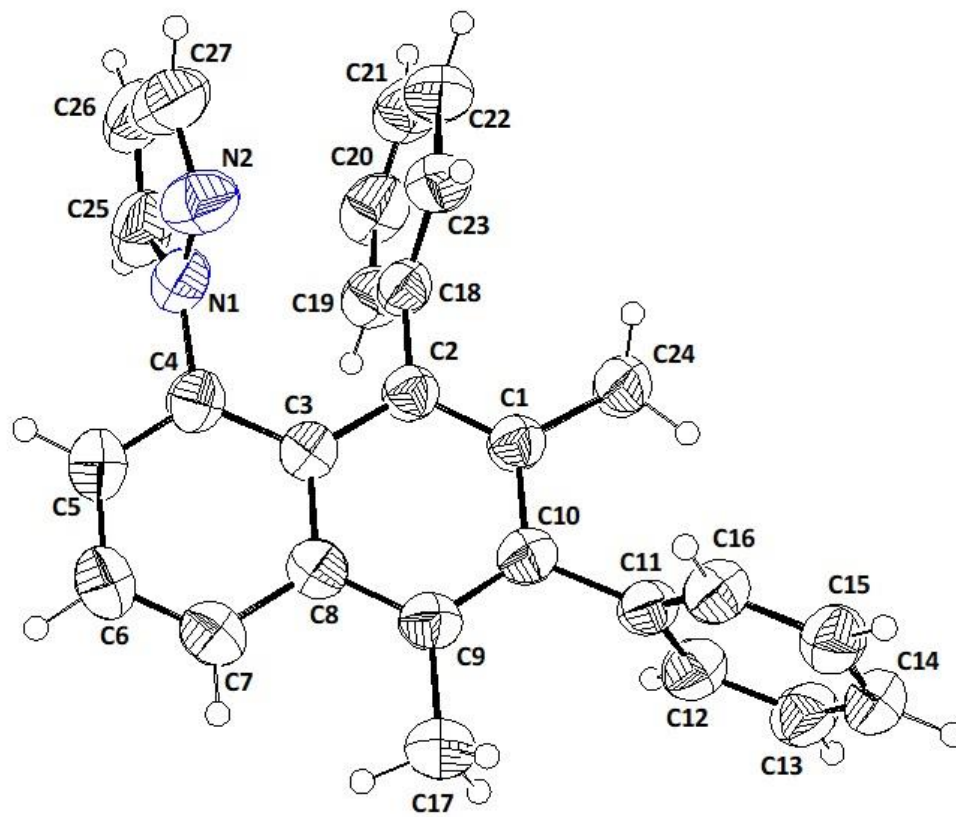

**References:**

1. D. D. Perrin, W. L. F. Armarego. *In Purification of Laboratory Chemicals*, 3rd ed.; Pergamon Press: New York, 1988.
2. a) J. C. Antilla, J. M. Baskin, T. E. Barder, S. L. Buchwald. *J. Org. Chem.* 2004, **69**, 5578. b) W. Hu, H. Wang, L. Bai, J. Liu, X. Luan. *Org. Lett.* 2018, **20**, 880.
3. D. Kalyani, A. R. Dick, W. Q. Anani, M. S. Sanford. *Tetrahedron* 2006, **62**, 11483.
4. C. Liu, Y. Zhang, N. Liu, J. Qiu. *Green Chem.*, 2012, **14**, 2999.
5. K. Pericherla, P. Khedar, B. Khungar, A. Kumar. *Chem. Commun.*, 2013, **49**, 2924.
6. H. Qiu, P. Zhou, W. Liu, J. Zhang, B. Chen. *Chemistry Select*, 2020, **5**, 2935.
7. M. J. Mio, L. C. Kopel, J. B. Braun, T. L. Gadzikwa, K. L. Hull, R. G. Brisbois, C. J. Markworth, P. A. Grieco. *Org. Lett.* 2002, **19**, 3199.
8. G. R. Van Hecke, W. D. Horrocks. *Inorg. Chem.* 1996, **5**(11), 1968.

$^1\text{H}$  and  $^{13}\text{C}$  NMR spectra of compound (3a)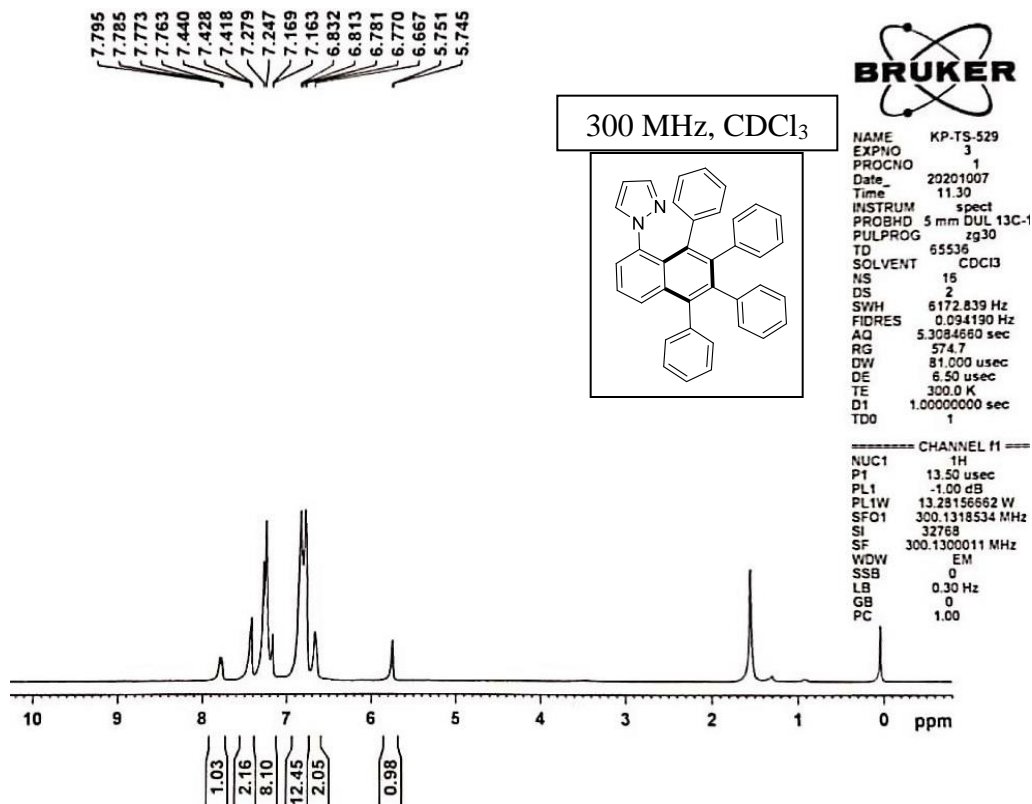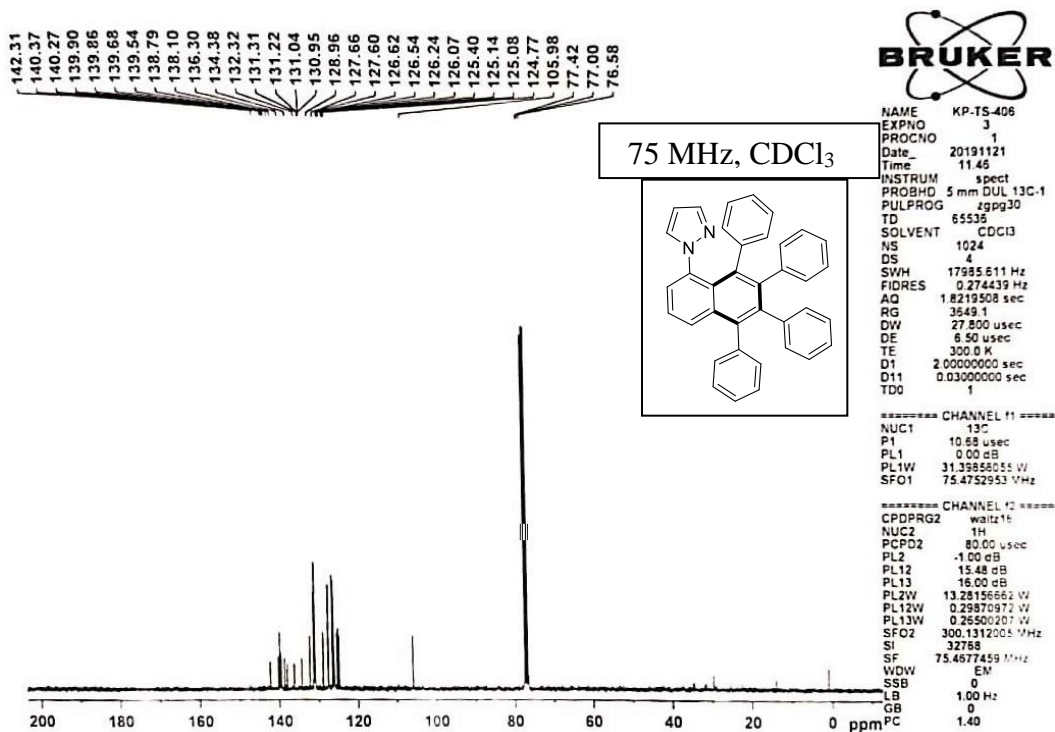

$^1\text{H}$  and  $^{13}\text{C}$  NMR spectra of compound (**3b**)

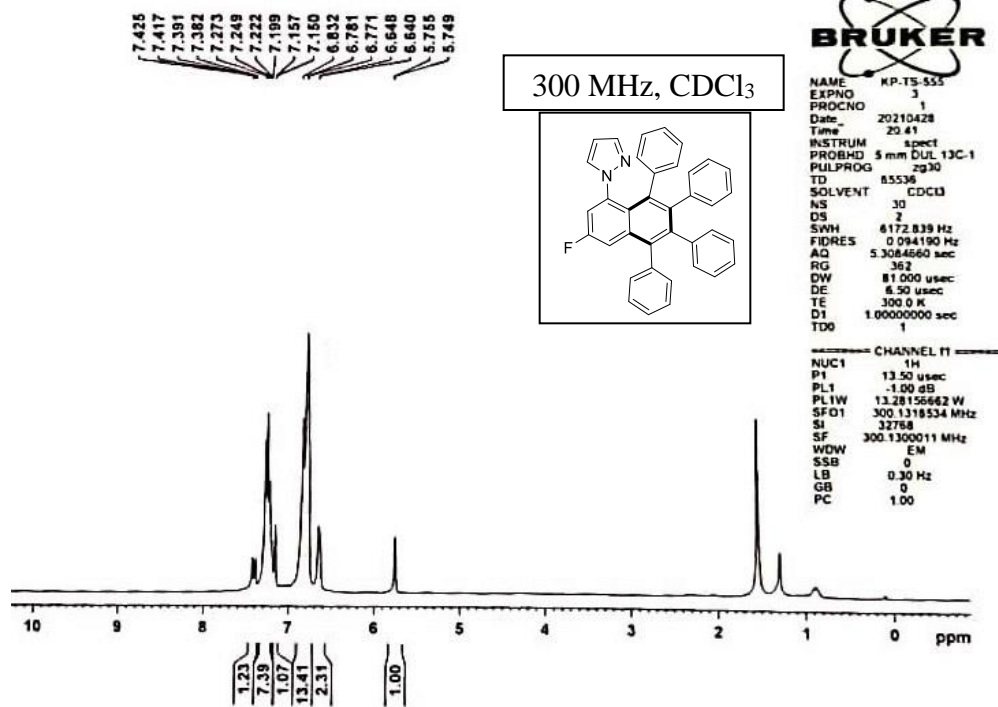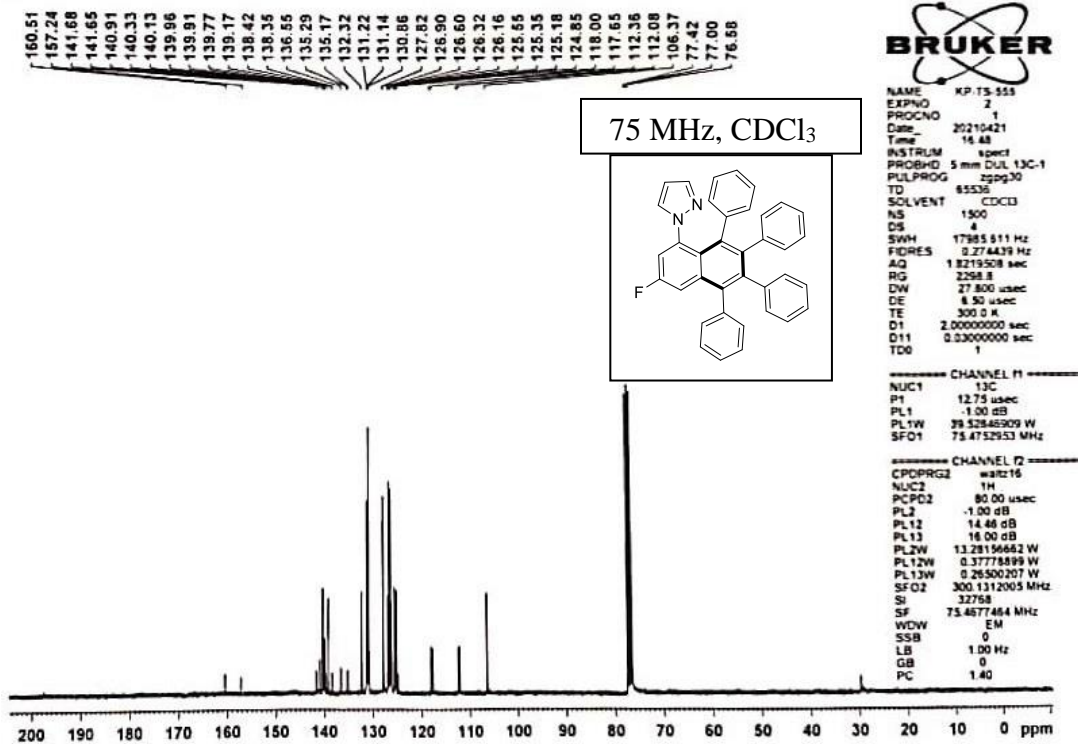

**$^{19}\text{F}$  NMR spectra of (3b)**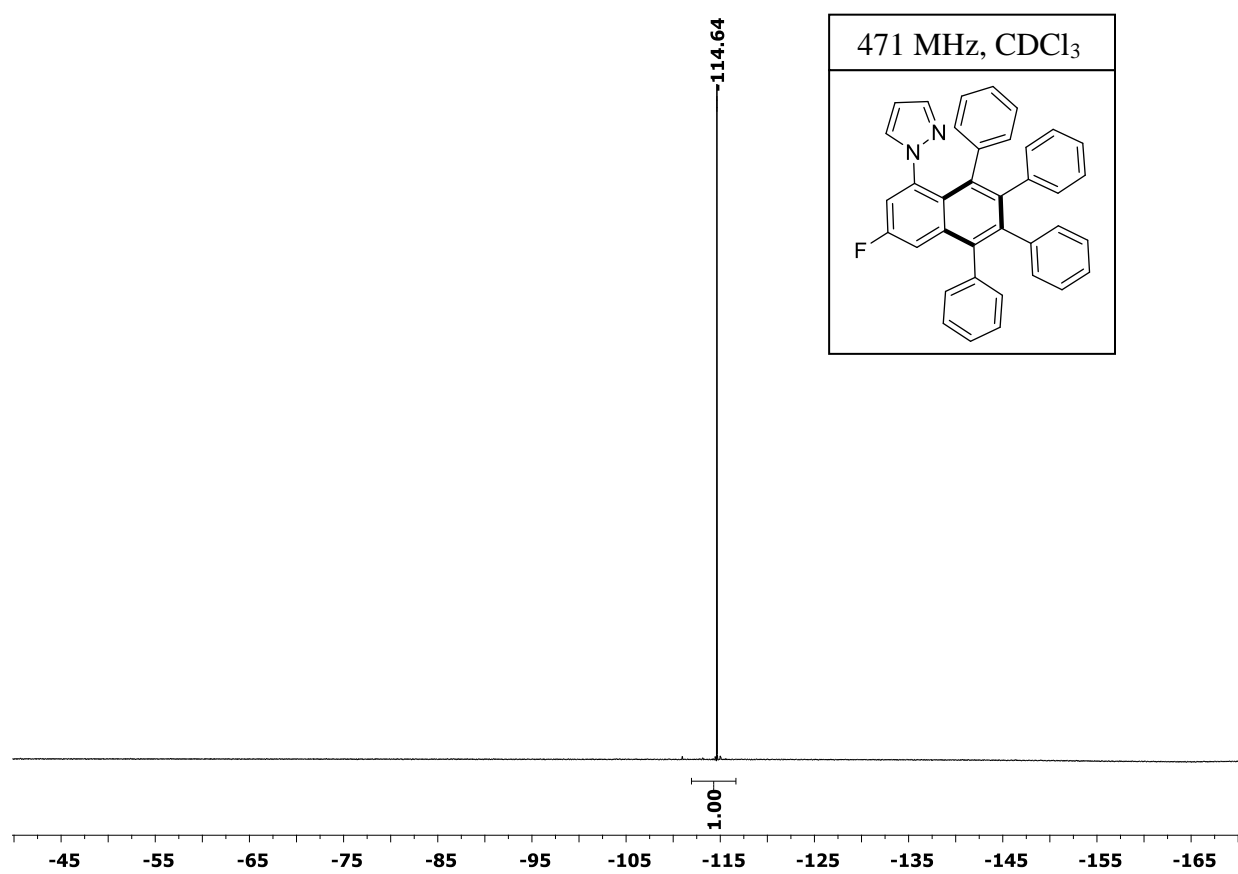

$^1\text{H}$  and  $^{13}\text{C}$  NMR spectra of compound (3c)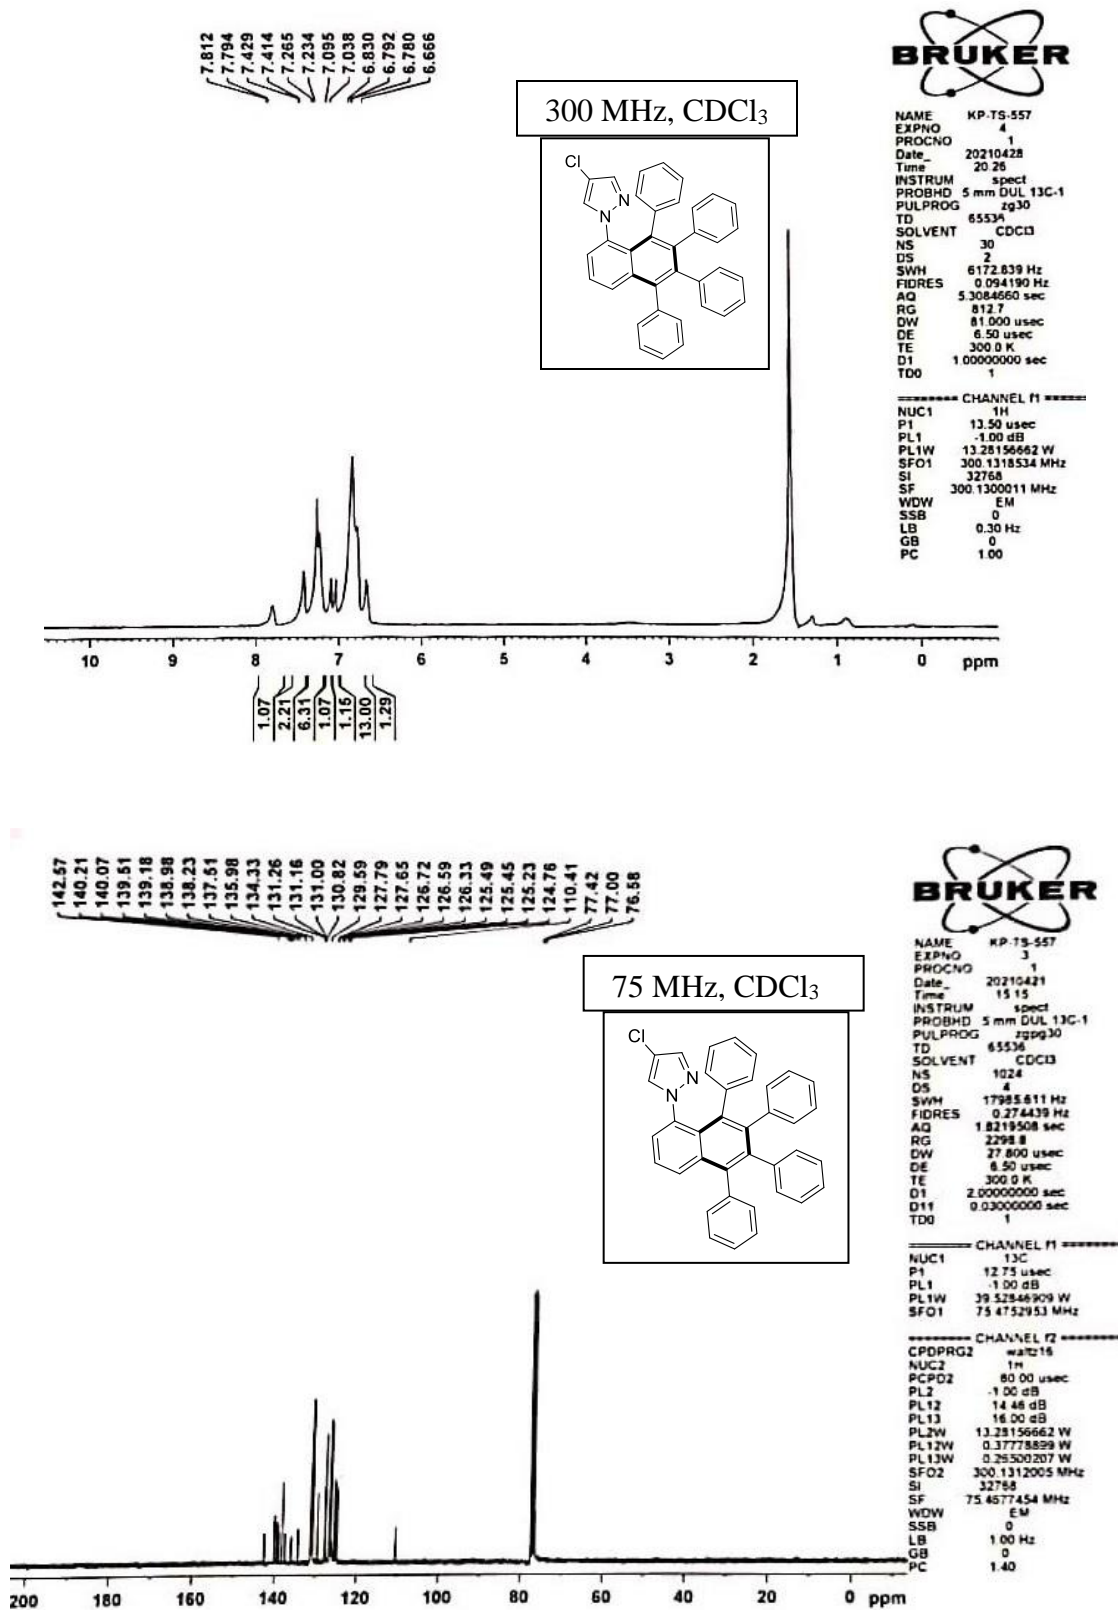

$^1\text{H}$  and  $^{13}\text{C}$  NMR spectra of compound (3d)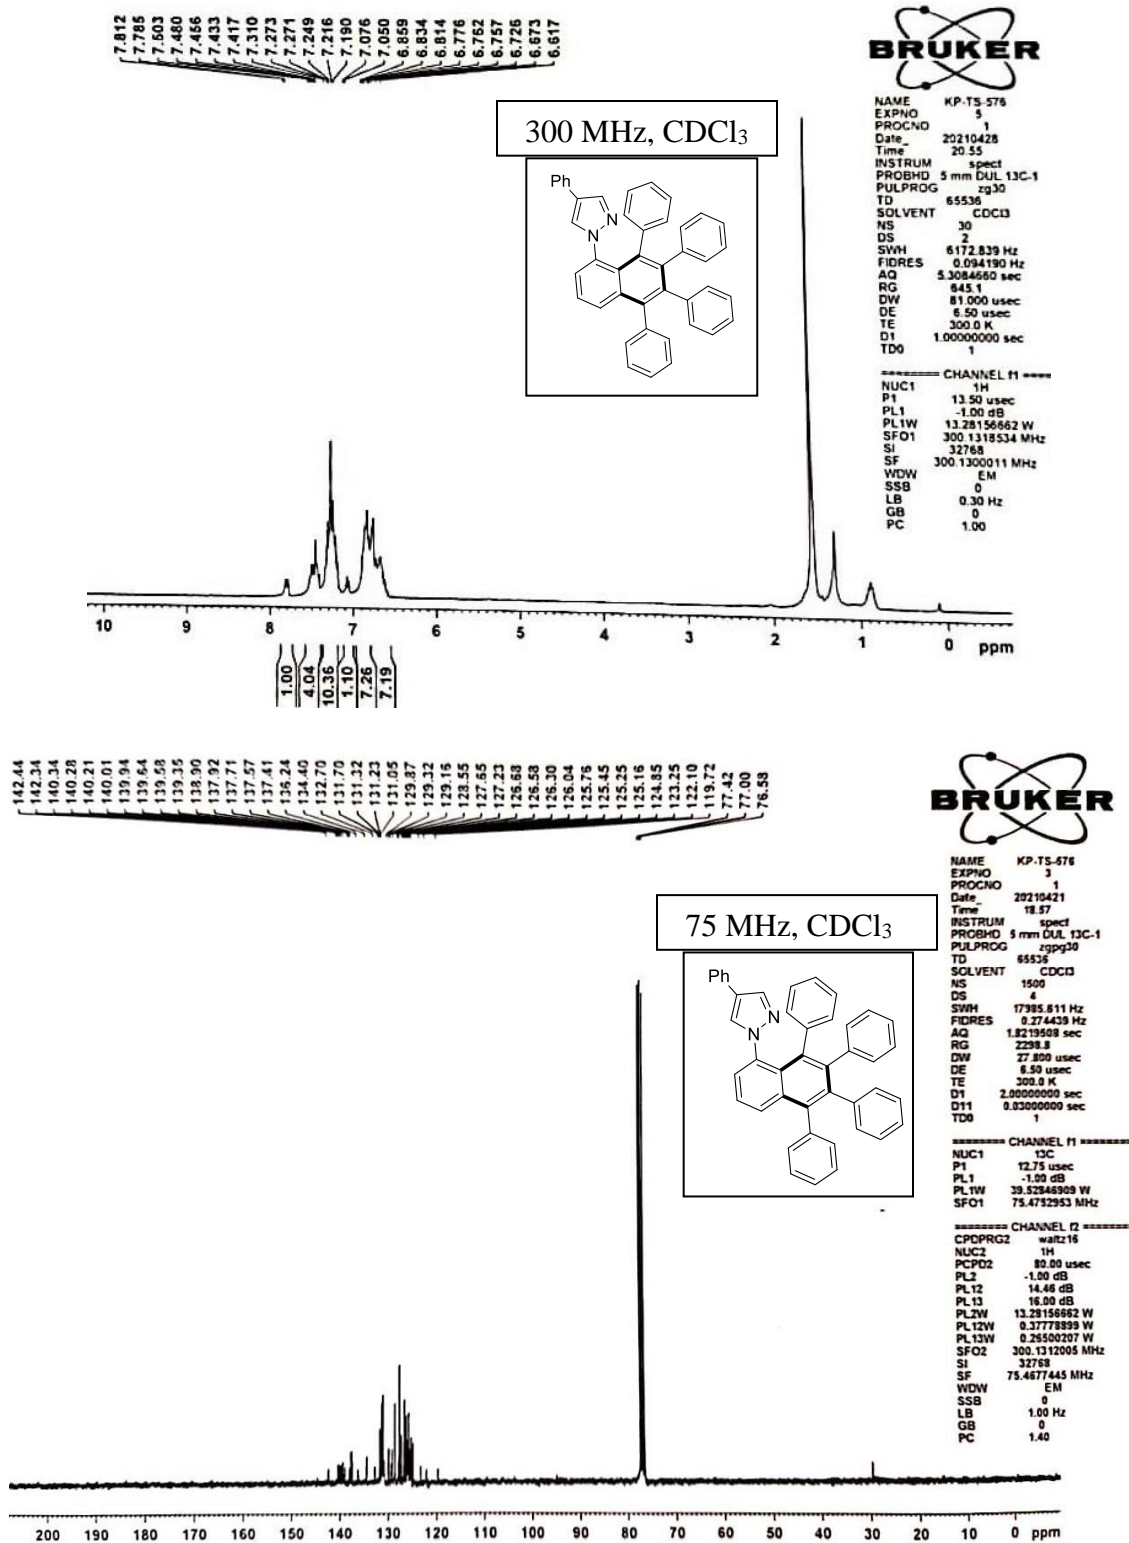



$^1\text{H}$  and  $^{13}\text{C}$  NMR spectra of compound (**3e**)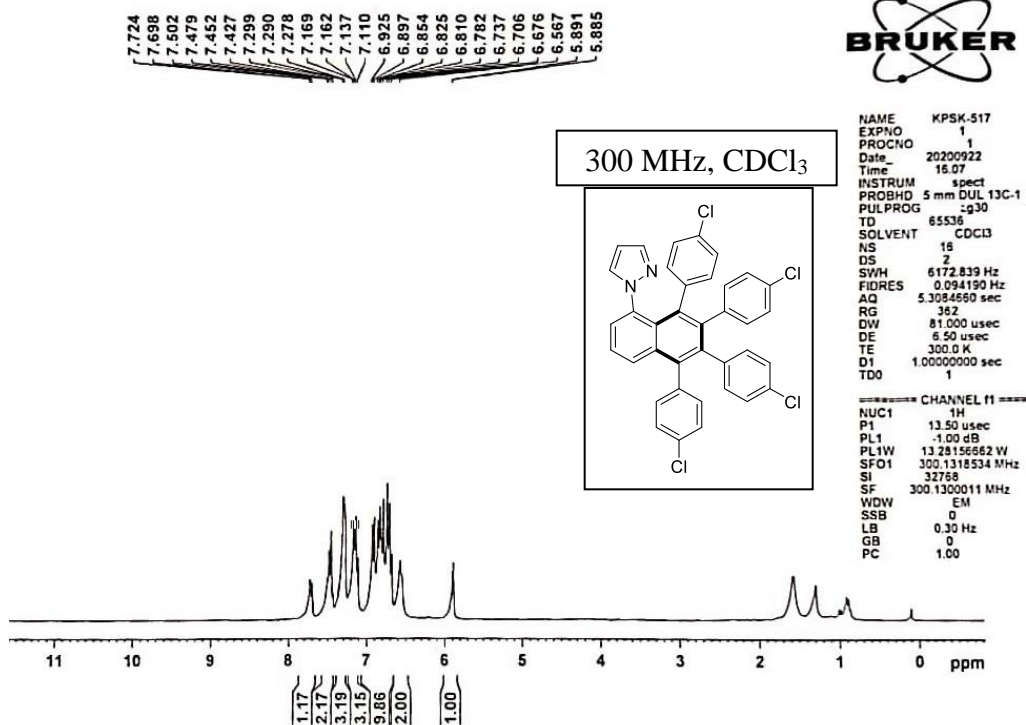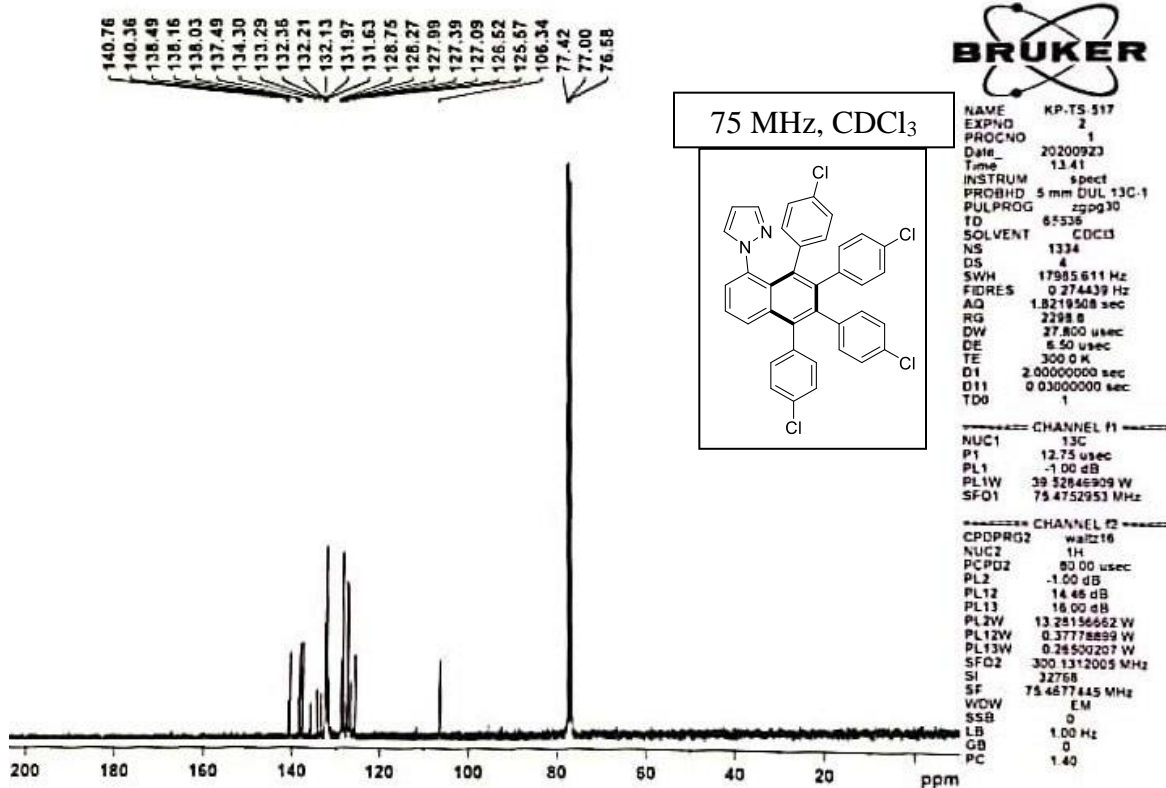

$^1\text{H}$  and  $^{13}\text{C}$  NMR spectra of compound (3f)

7.757  
7.737  
7.731  
7.501  
7.477  
7.451  
7.427  
7.279  
7.189  
7.183  
7.170  
7.161  
7.143  
7.021  
6.992  
6.963  
6.795  
6.777  
6.767  
6.748  
6.748  
6.725  
6.716  
6.697  
6.641  
6.612  
6.582  
6.567  
6.538  
6.508  
6.479  
5.873  
5.867

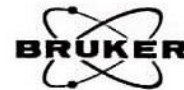300 MHz,  $\text{CDCl}_3$ 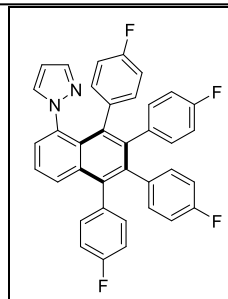

NAME KP-TS-530  
EXPNO 3  
PROCNO 1  
Date\_ 20201005  
Time 20 06  
INSTRUM spect  
PROBHD 5 mm DUL 13C-1  
PULPROG zg30  
TD 65536  
SOLVENT  $\text{CDCl}_3$   
NS 16  
DS 2  
SWH 6172.839 Hz  
FIDRES 0.094190 Hz  
AQ 3.308460 sec  
RG 322.5  
DW 81.000 usec  
DE 6.50 usec  
TE 300.0 K  
D1 1.0000000 sec  
TD0 1

===== CHANNEL f1 =====  
NUC1 1H  
P1 13.50 usec  
PL1 -1.00 dB  
PL1W 13.28156662 W  
SFO1 300.1318534 MHz  
SI 32768  
SF 300.1300011 MHz  
WDW EM  
SSB 0  
LB 0.30 Hz  
GB 0  
PC 1.00

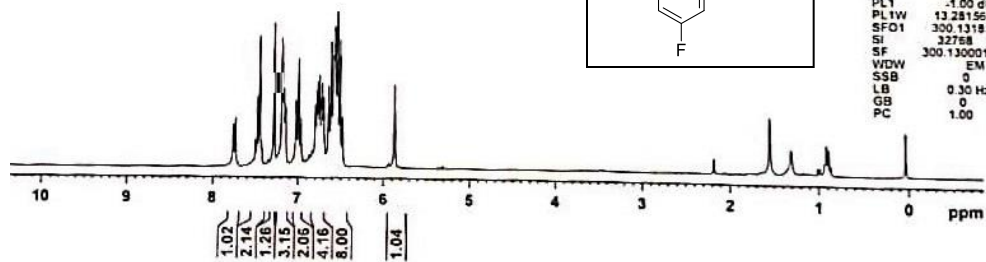

163.47  
162.55  
162.44  
162.41  
160.20  
159.29  
159.20  
159.16  
141.51  
140.26  
139.16  
138.36  
138.06  
136.81  
136.01  
135.97  
135.95  
135.87  
135.82  
135.25  
135.20  
135.15  
134.48  
132.74  
132.63  
132.50  
132.38  
132.27  
132.15  
128.81  
128.09  
127.98  
125.34  
115.08  
114.79  
114.15  
113.87  
113.59  
113.34  
113.06  
106.27  
77.42  
77.00

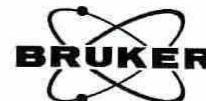75 MHz,  $\text{CDCl}_3$ 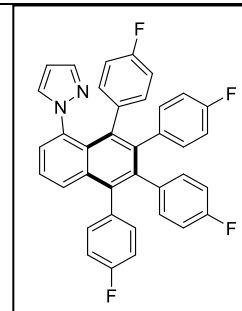

NAME KP-TS-530  
EXPNO 2  
PROCNO 1  
Date\_ 20201005  
Time 20.02  
INSTRUM spect  
PROBHD 5 mm DUL 13C-1  
PULPROG zgpg30  
TD 65536  
SOLVENT  $\text{CDCl}_3$   
NS 1916  
DS 4  
SWH 17885.611 Hz  
FIDRES 0.274439 Hz  
AQ 1.8219508 sec  
RG 3251  
DW 27.800 usec  
DE 6.50 usec  
TE 300.0 K  
D1 2.0000000 sec  
D11 0.03000000 sec  
TD0 1

===== CHANNEL f1 =====  
NUC1 13C  
P1 12.75 usec  
PL1 -1.00 dB  
PL1W 39.52846909 W  
SFO1 75.4752953 MHz

===== CHANNEL f2 =====  
CPDPRG2 waltz16  
NUC2 1H  
PCPD2 80.00 usec  
PL2 -1.00 dB  
PL12 14.46 dB  
PL13 16.00 dB  
PL2W 13.28156662 W  
PL12W 0.37778899 W  
PL13W 0.26500207 W  
SFO2 300.1312005 MHz  
SI 32768  
SF 75.4677441 MHz  
WDW EM  
SSB 0  
LB 1.00 Hz  
GB 0  
PC 1.40

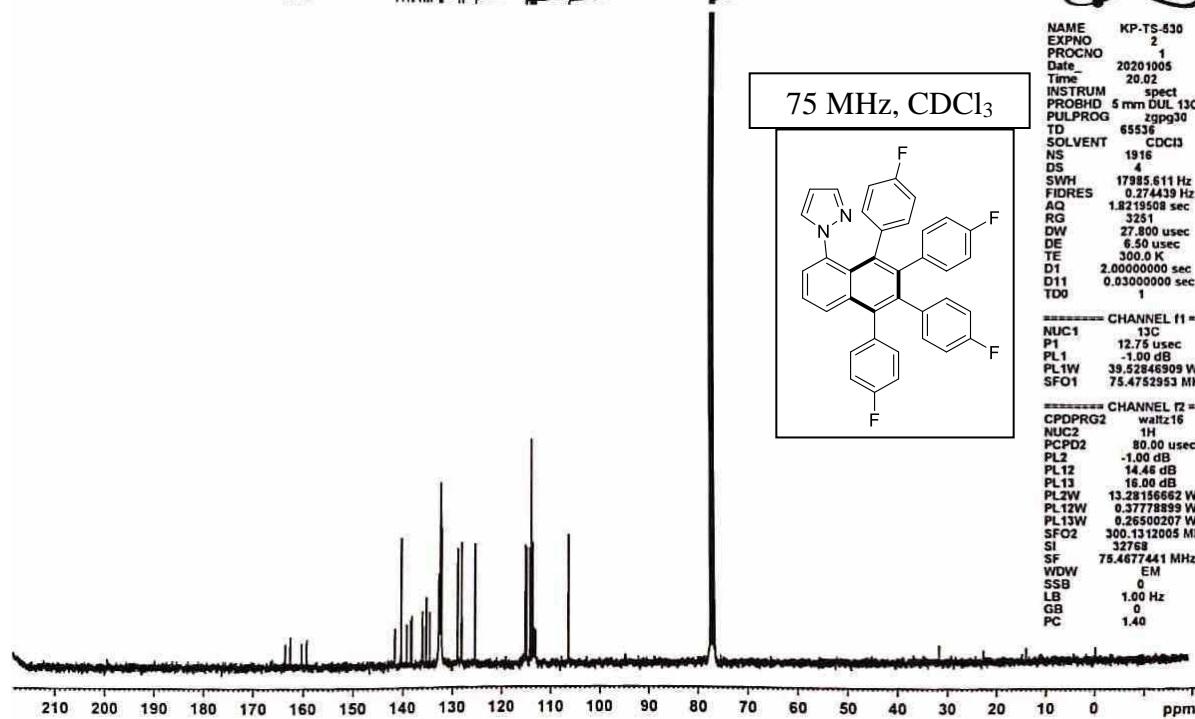

**$^{19}\text{F}$  NMR spectra of (3f)**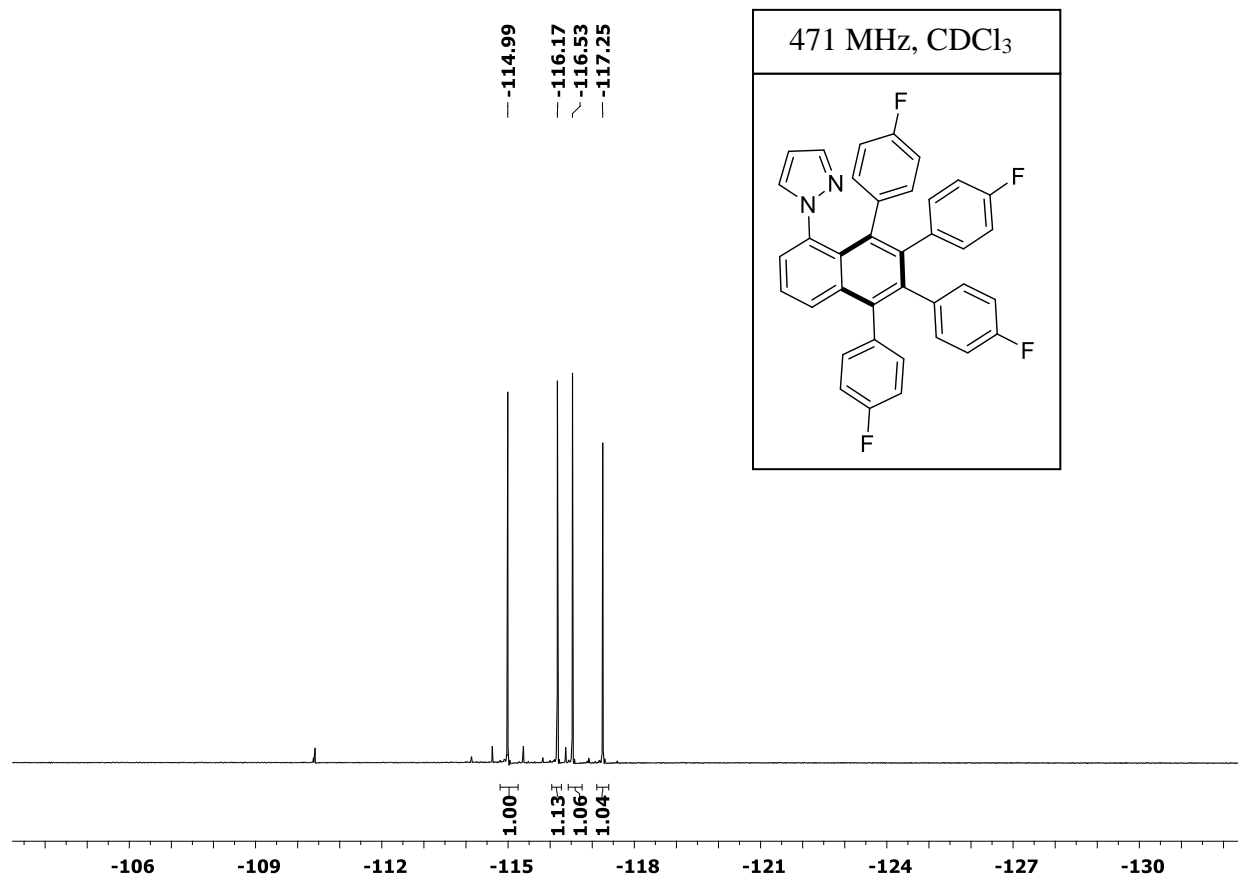

$^1\text{H}$  and  $^{13}\text{C}$  NMR spectra of compound (3g)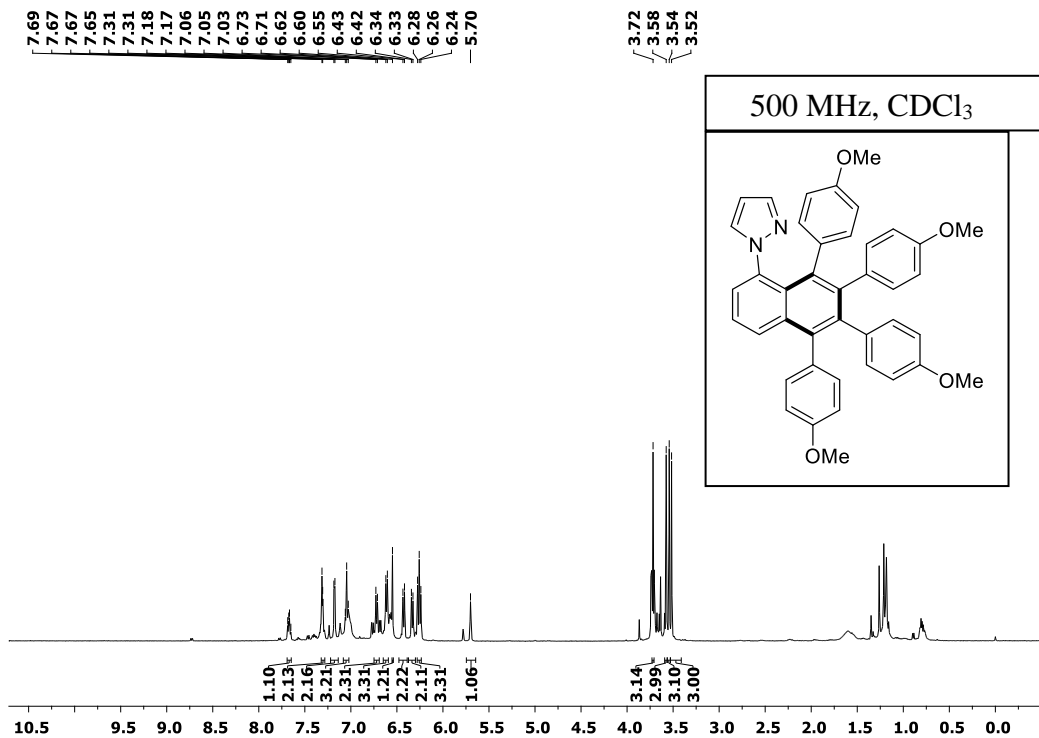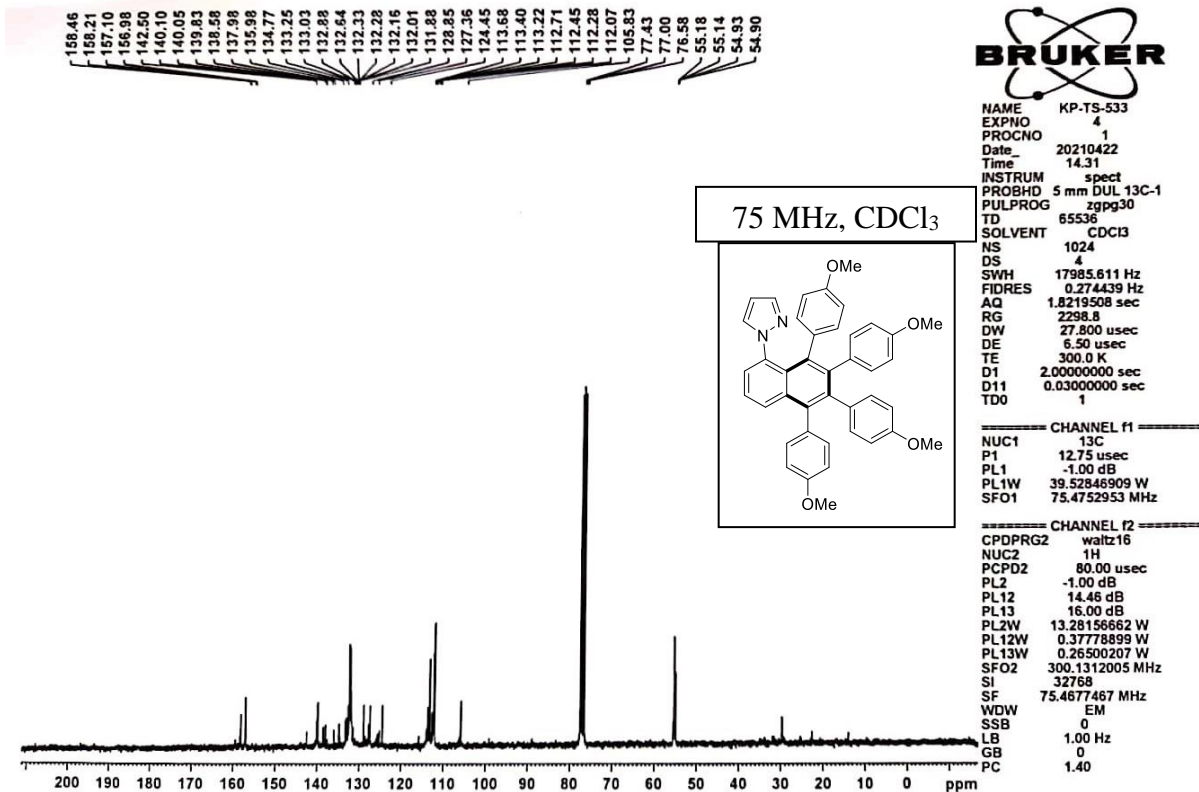

$^1\text{H}$  and  $^{13}\text{C}$  NMR spectra of compound (3h)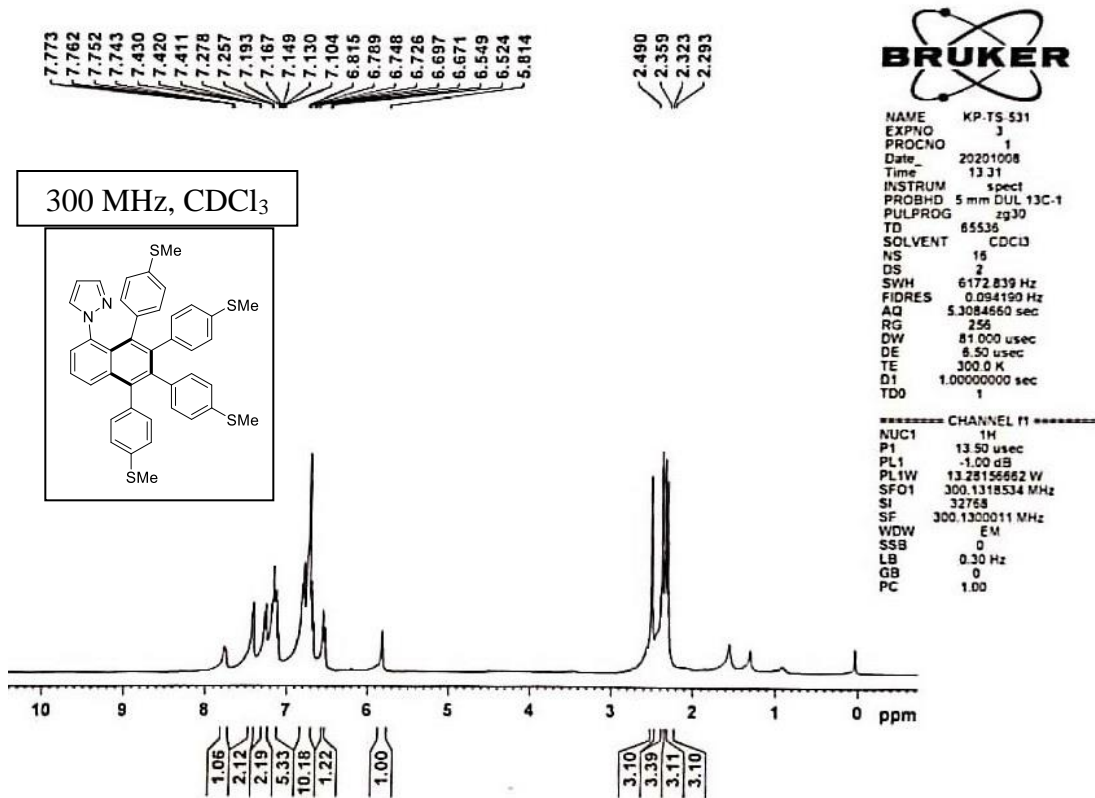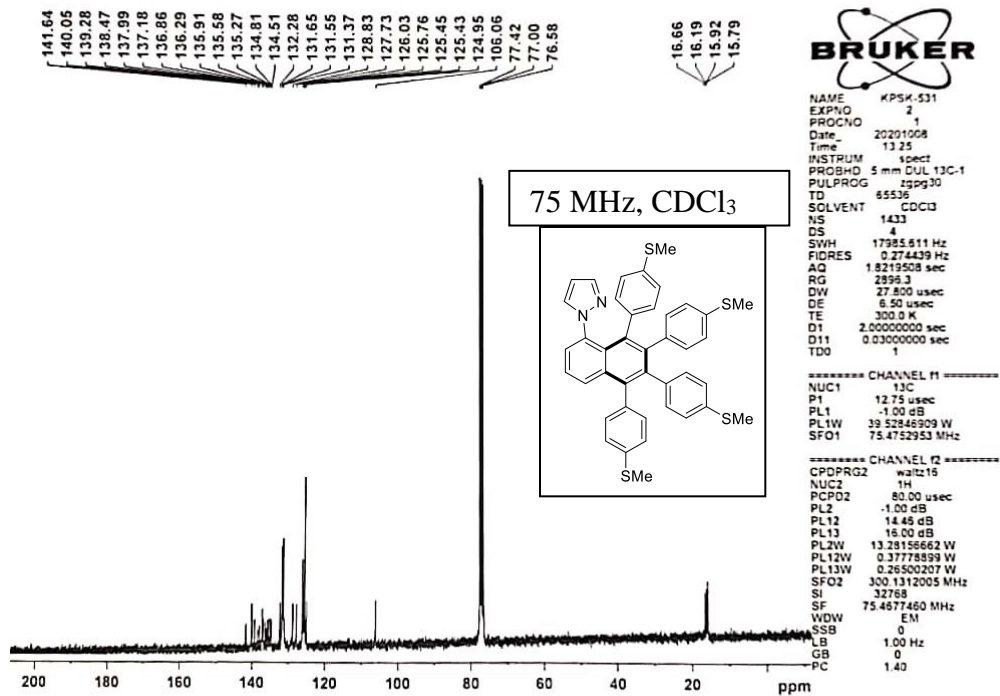

$^1\text{H}$  and  $^{13}\text{C}$  NMR spectra of compound (3i)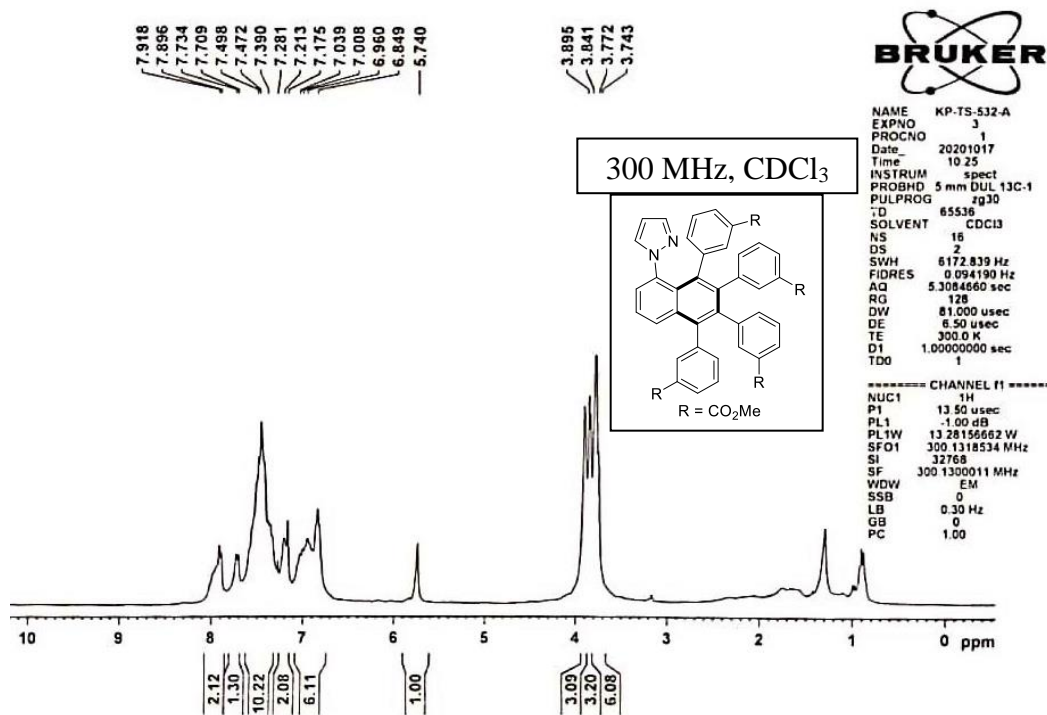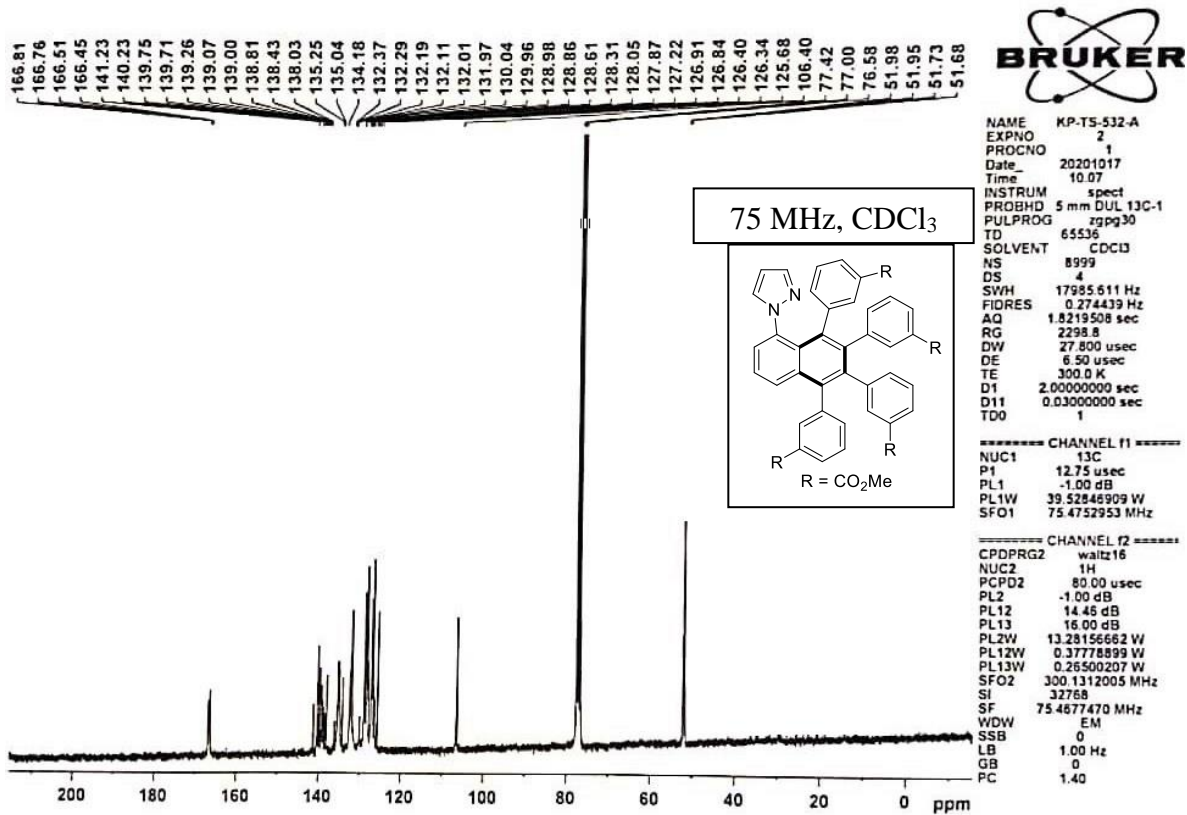

$^1\text{H}$  and  $^{13}\text{C}$  NMR spectra of compound (3j)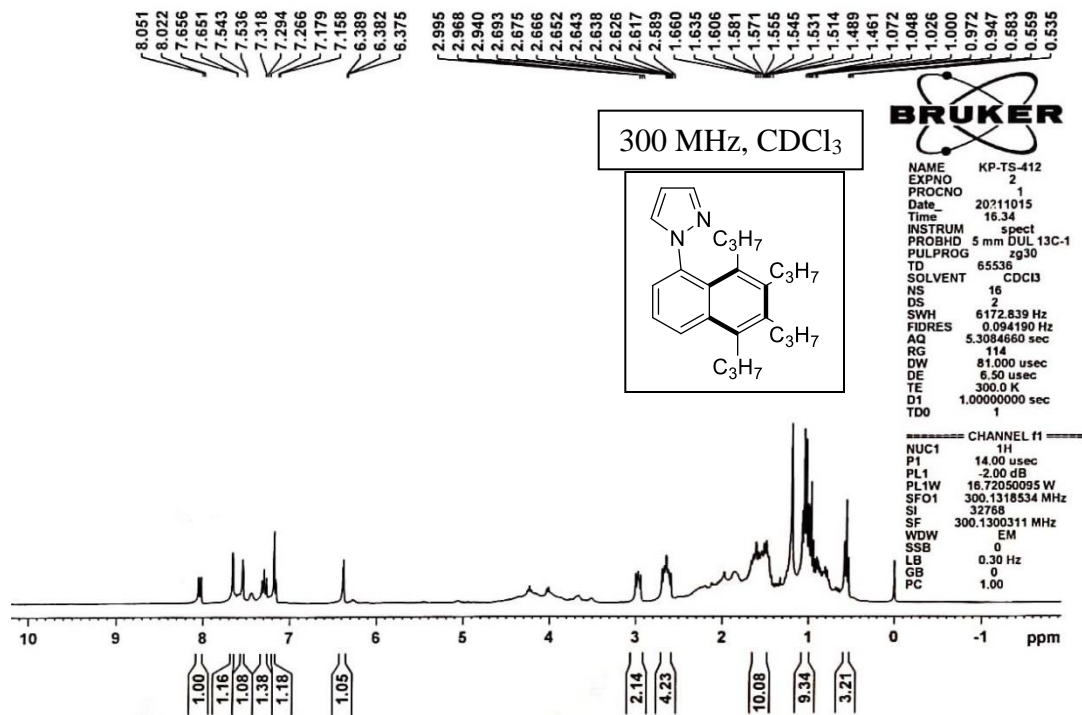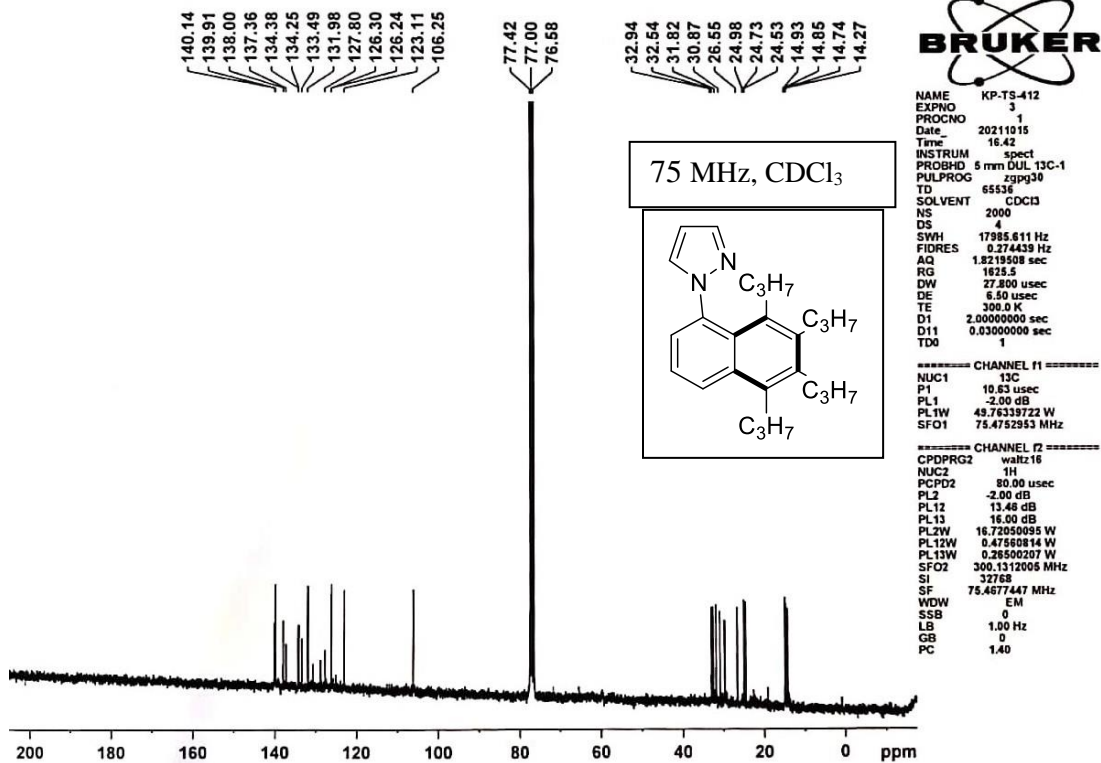

$^1\text{H}$  and  $^{13}\text{C}$  NMR spectra of compound (**3k**)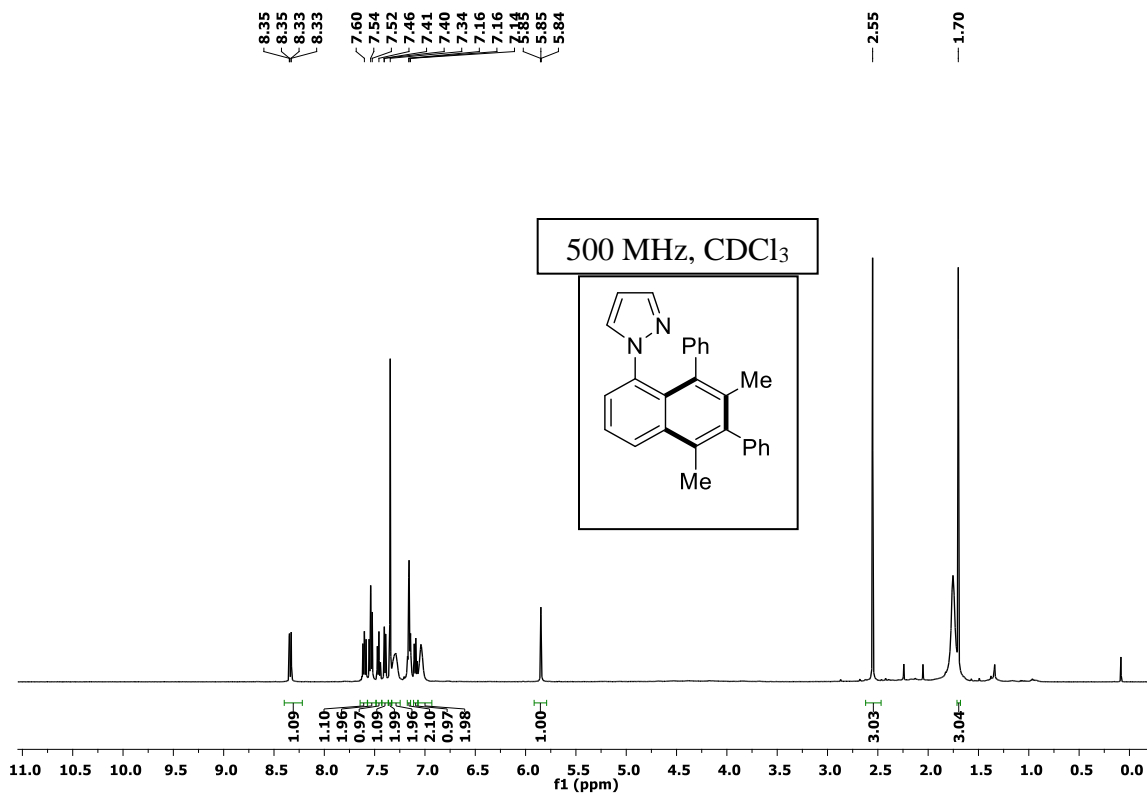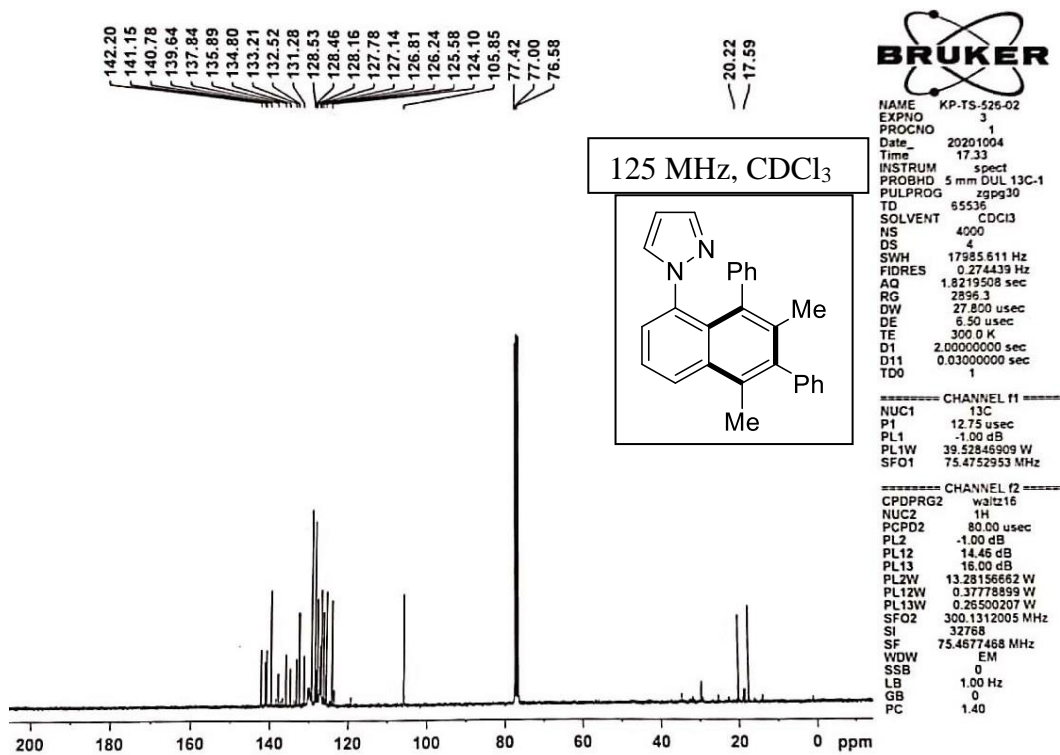





$^1\text{H}$  and  $^{13}\text{C}$  NMR spectra of compound (**5a**)

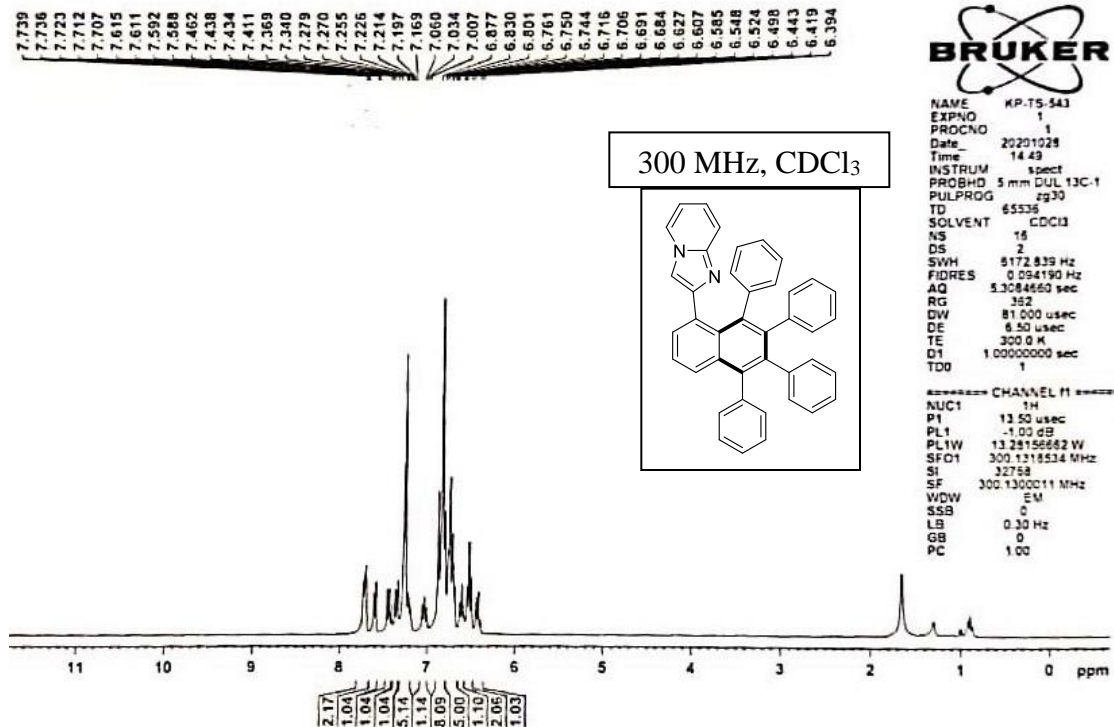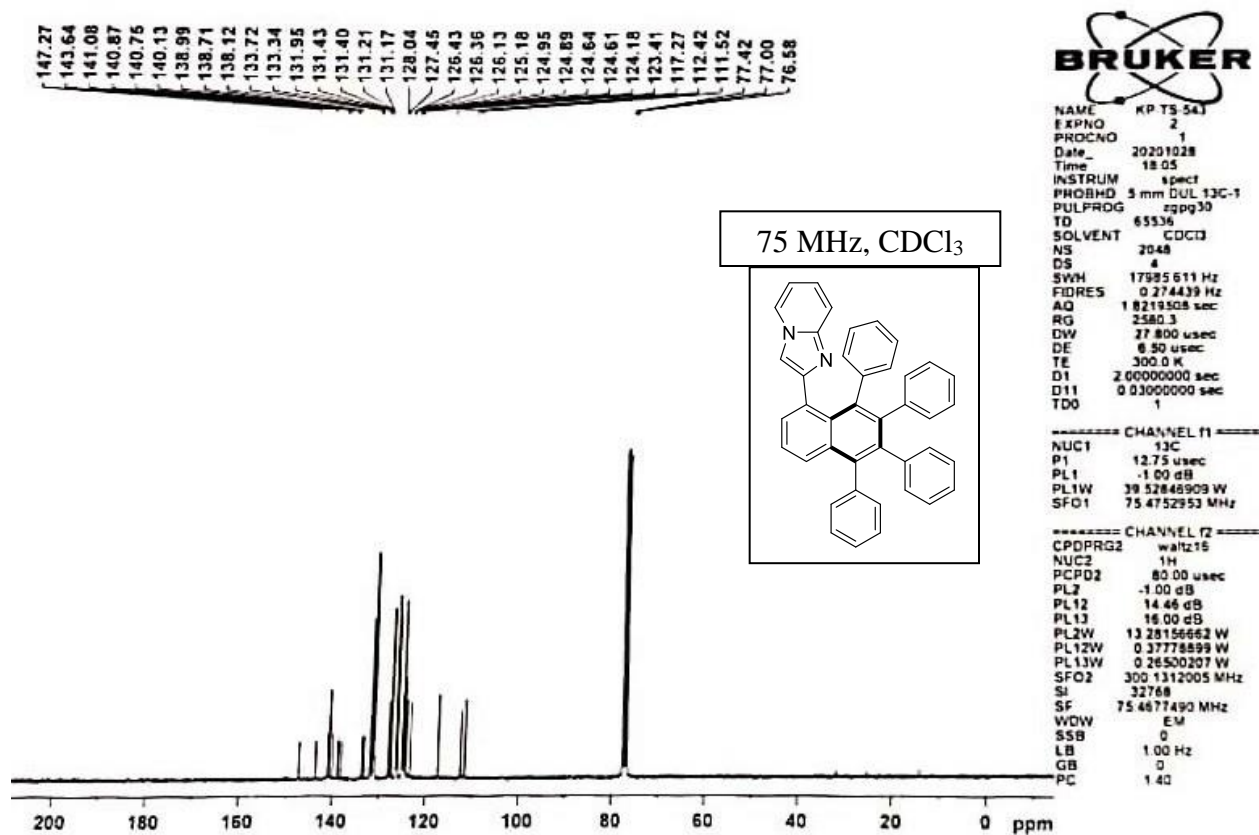

$^1\text{H}$  and  $^{13}\text{C}$  NMR spectra of compound (**5b**)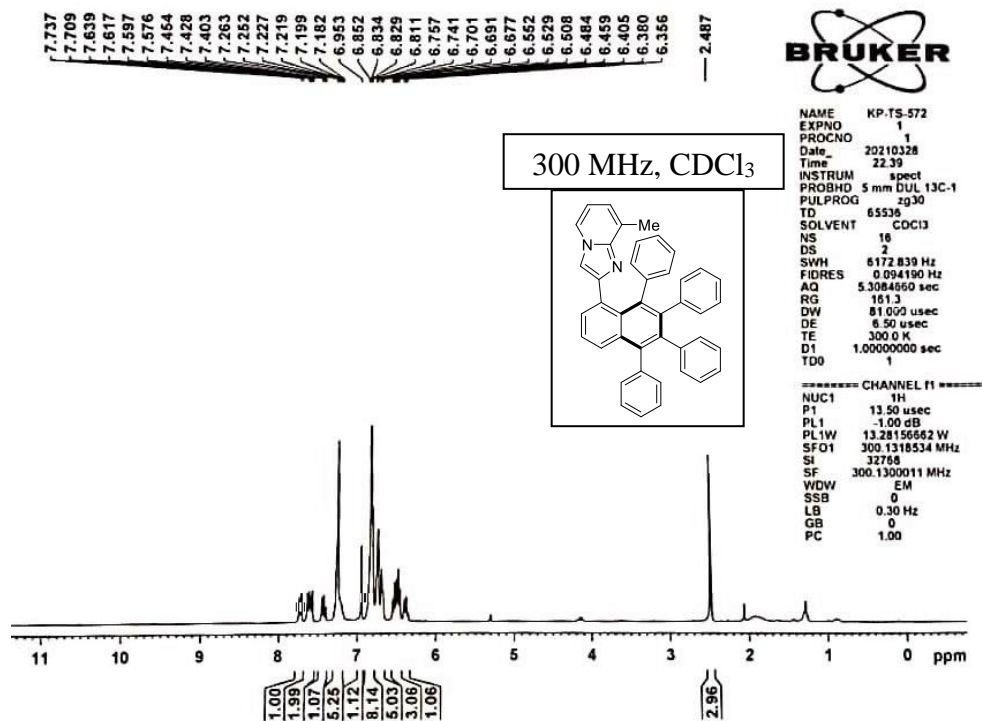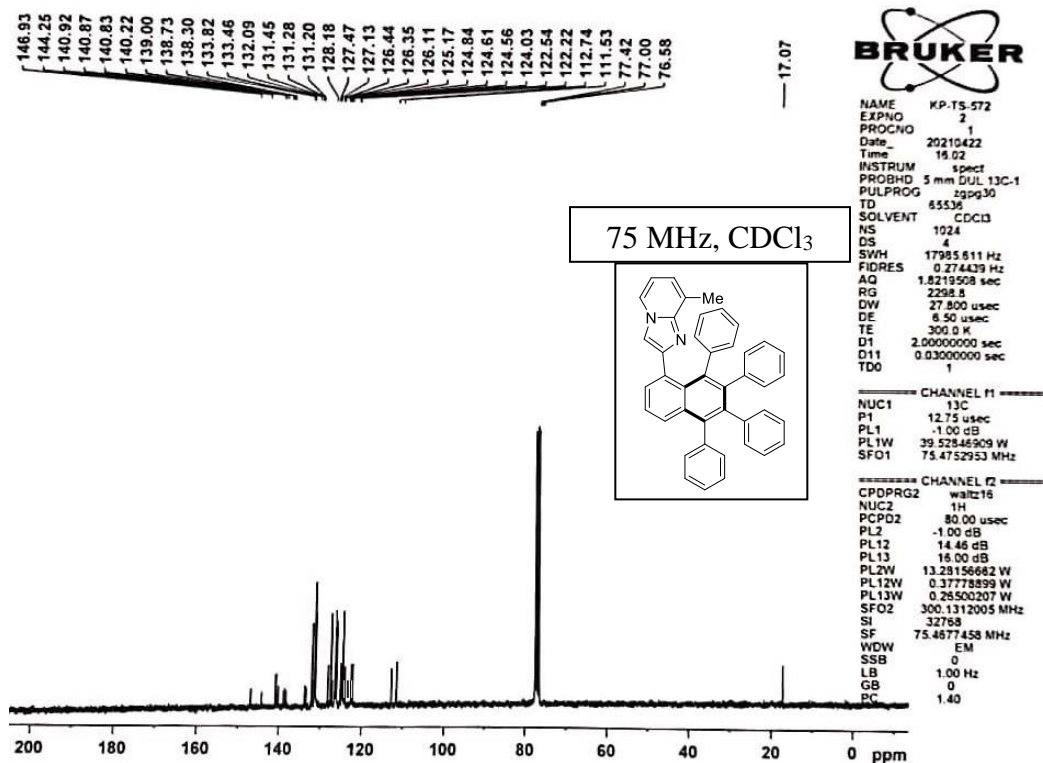

$^1\text{H}$  and  $^{13}\text{C}$  NMR spectra of compound (**5c**)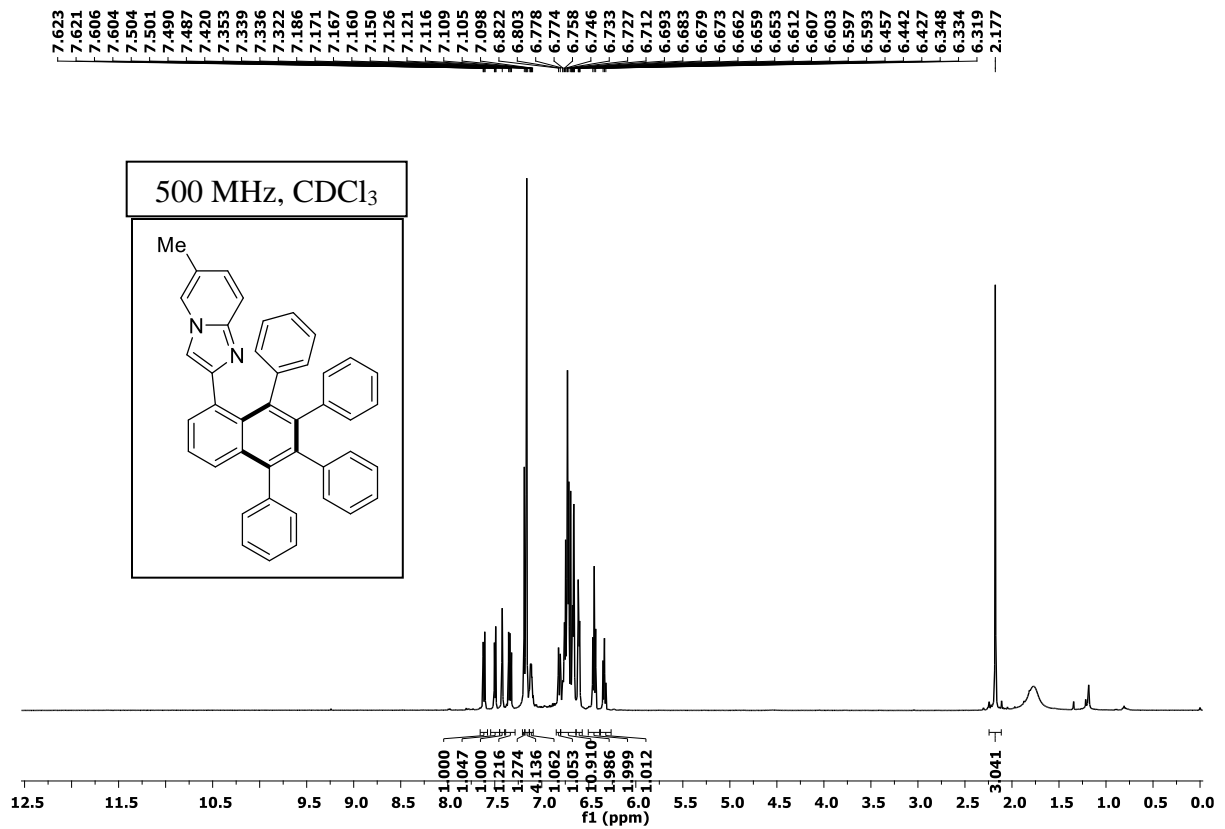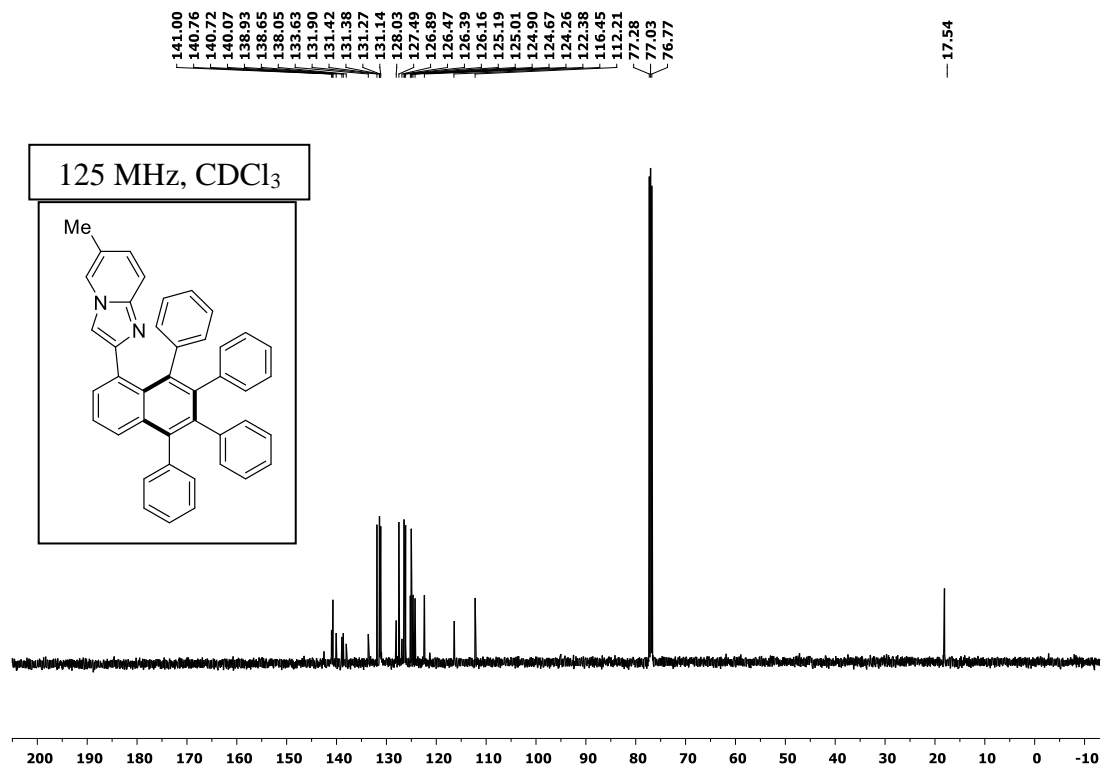

$^1\text{H}$  and  $^{13}\text{C}$  NMR spectra of compound (**5d**)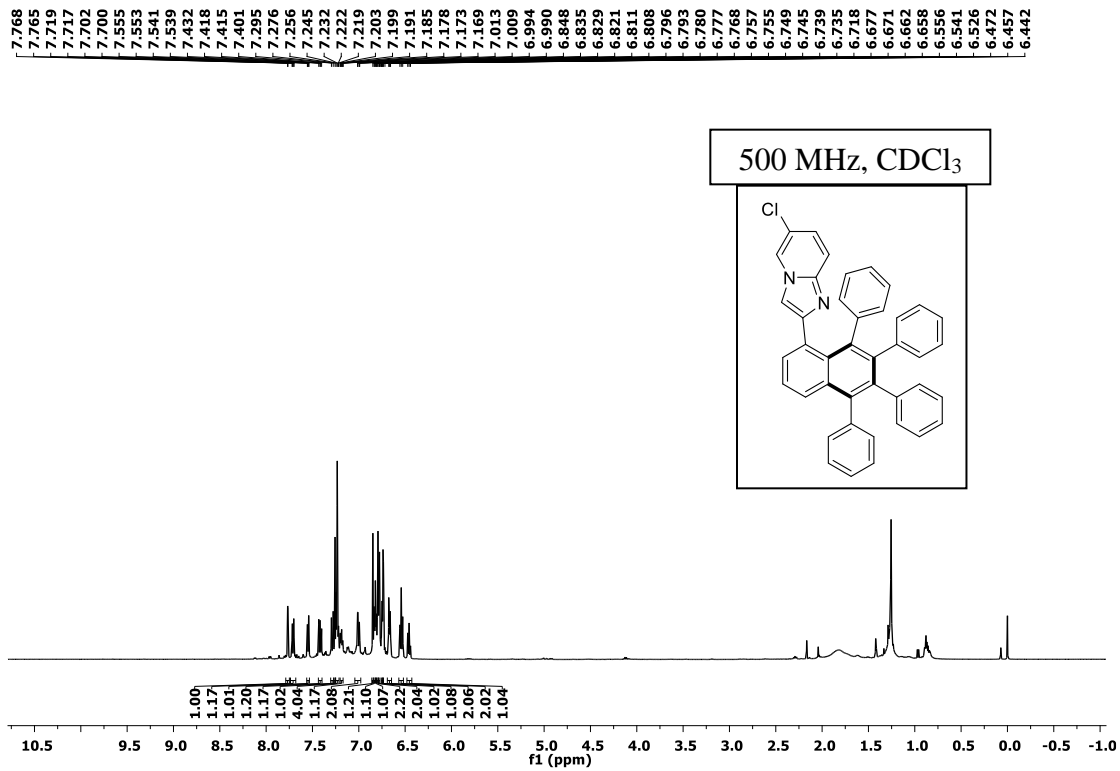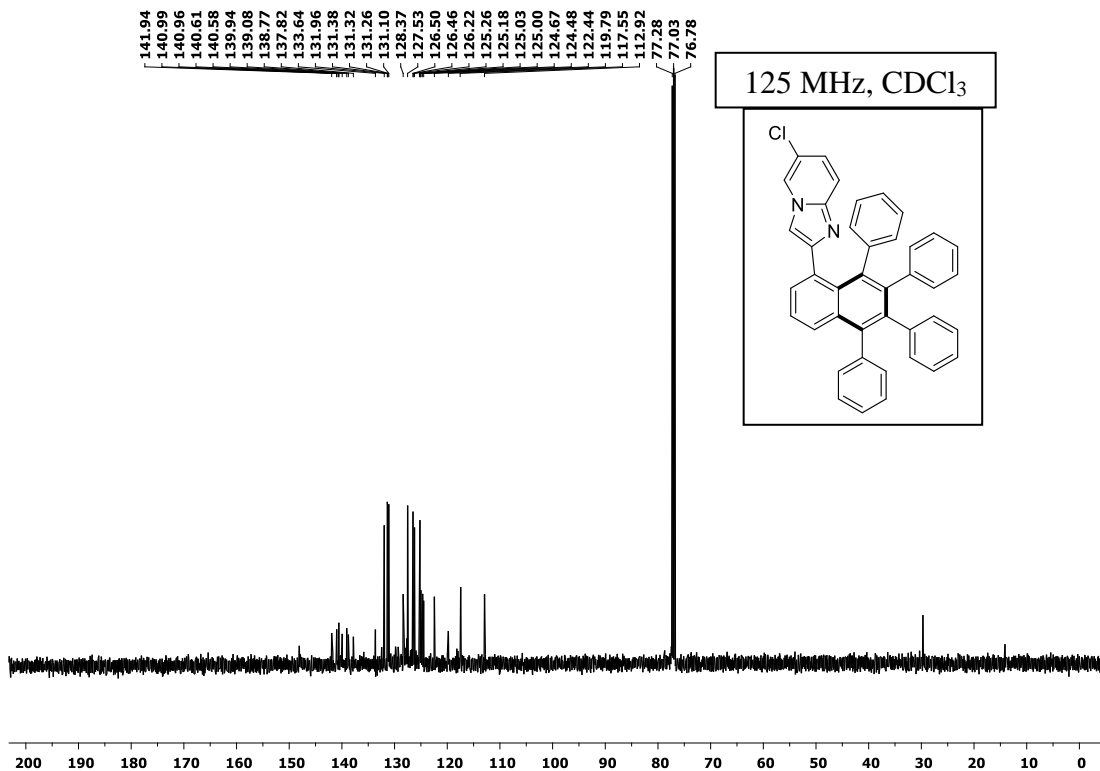

$^1\text{H}$  and  $^{13}\text{C}$  NMR spectra of compound (**5e**)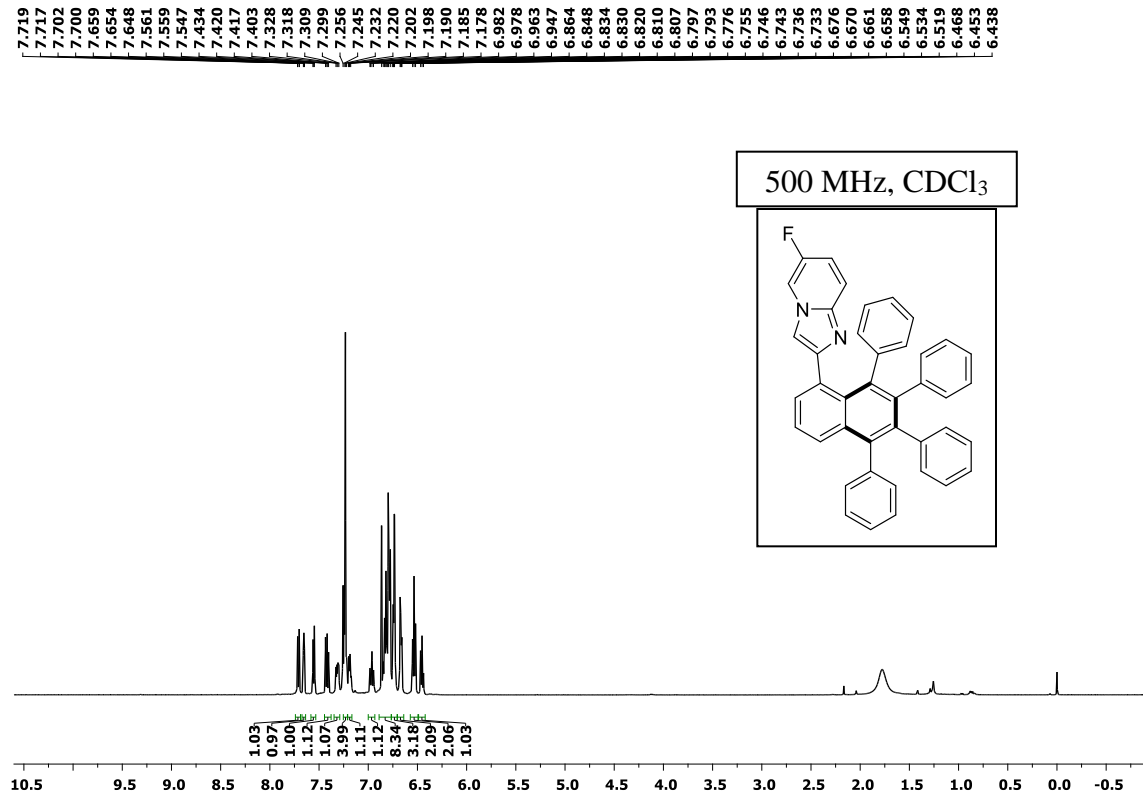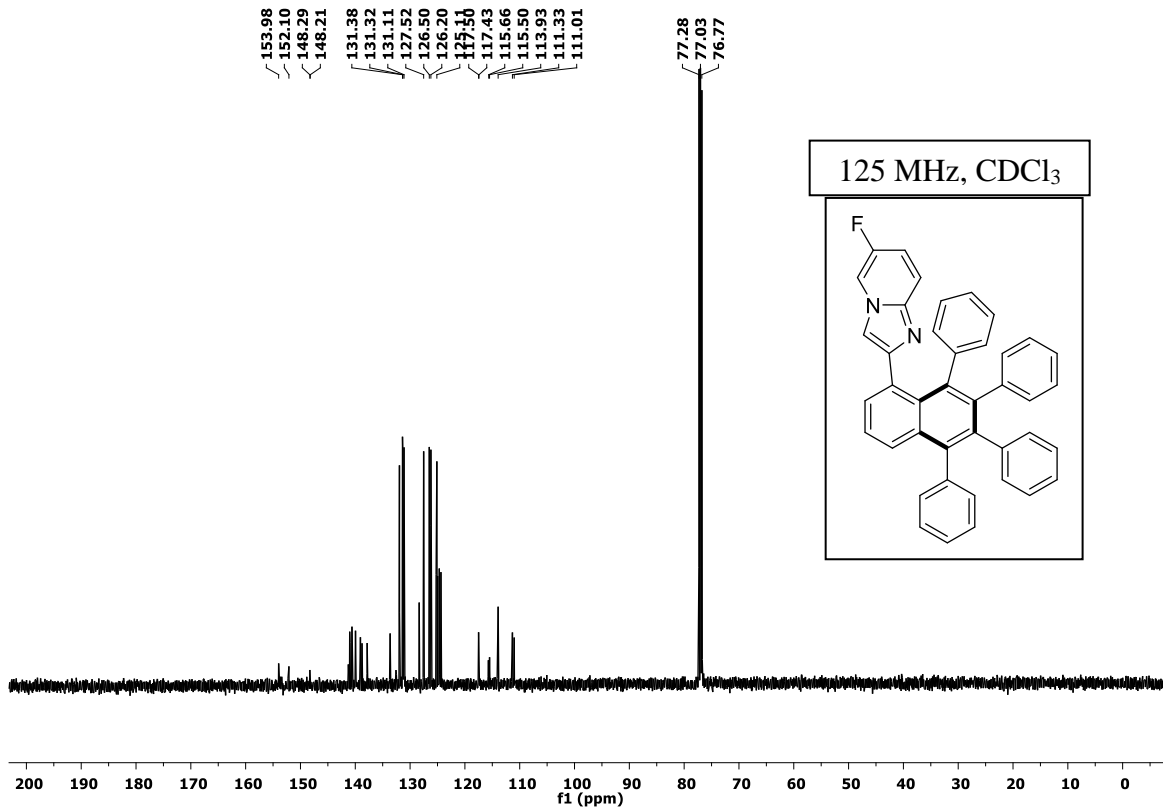

**$^{19}\text{F}$  NMR spectra of (5e)**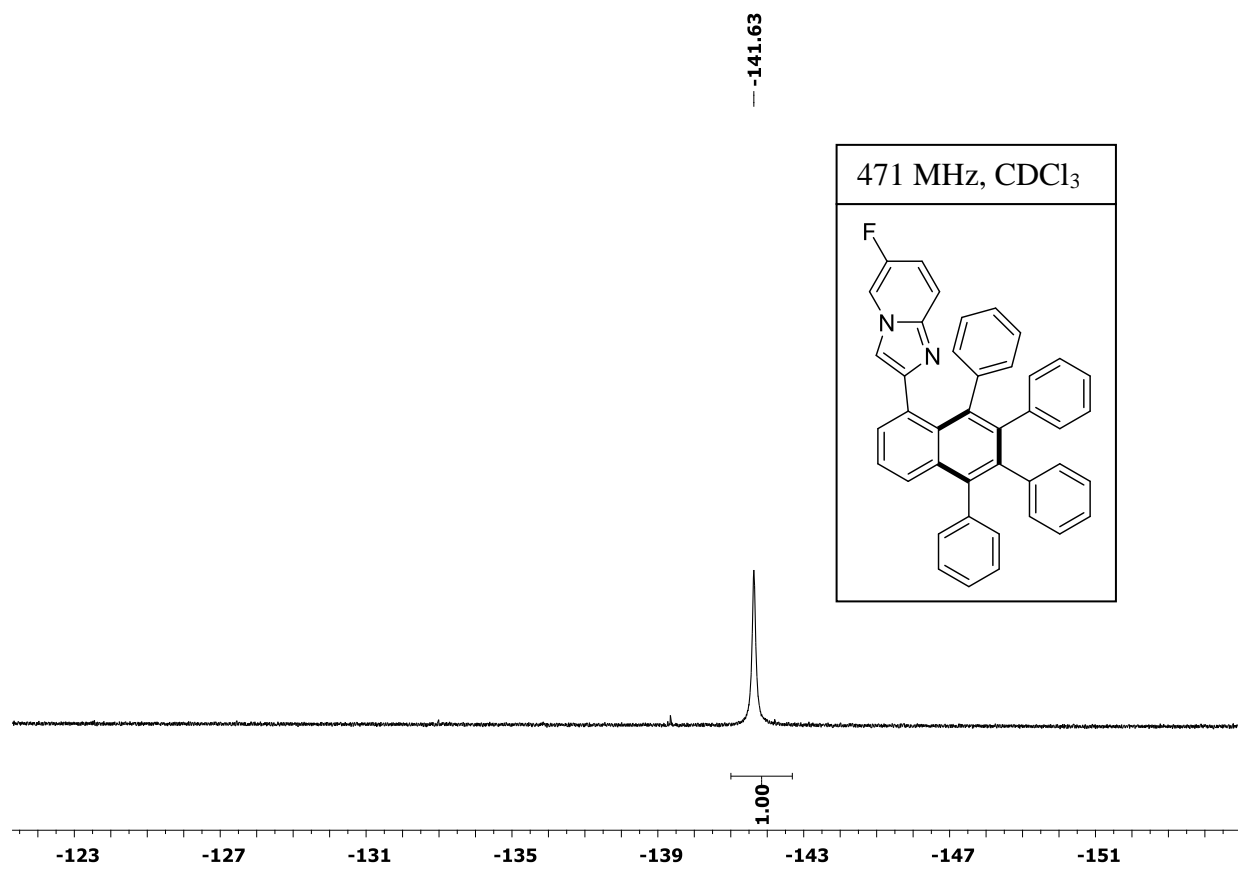

$^1\text{H}$  and  $^{13}\text{C}$  NMR spectra of compound (**5g**)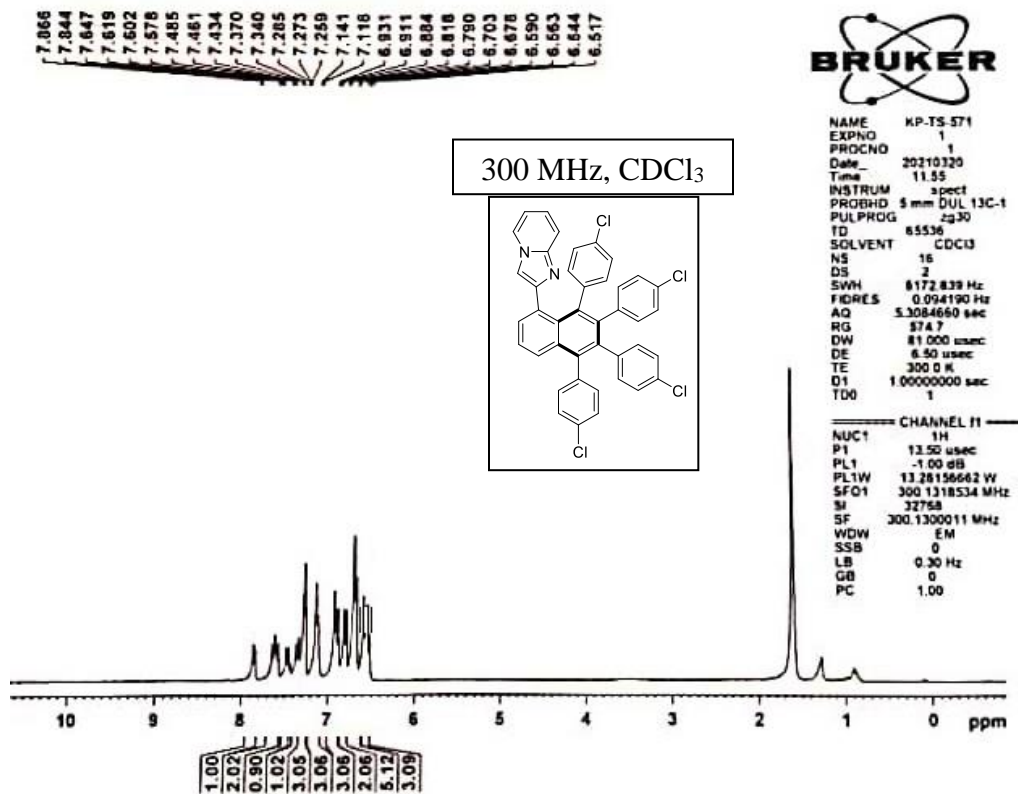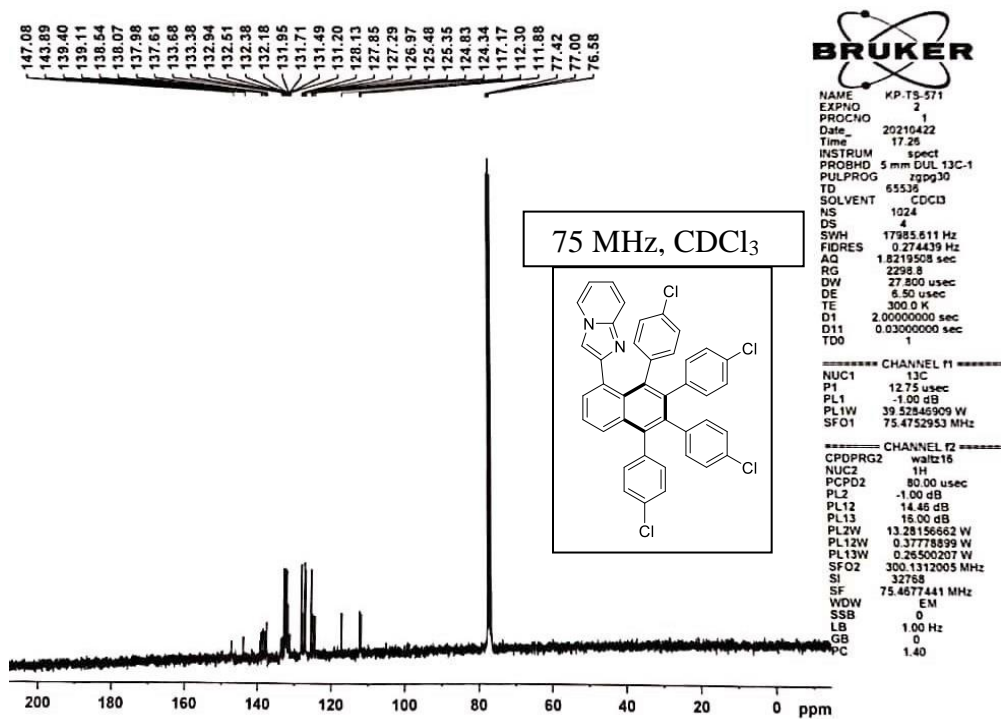



$^1\text{H}$  and  $^{13}\text{C}$  NMR spectra of compound (**5h**)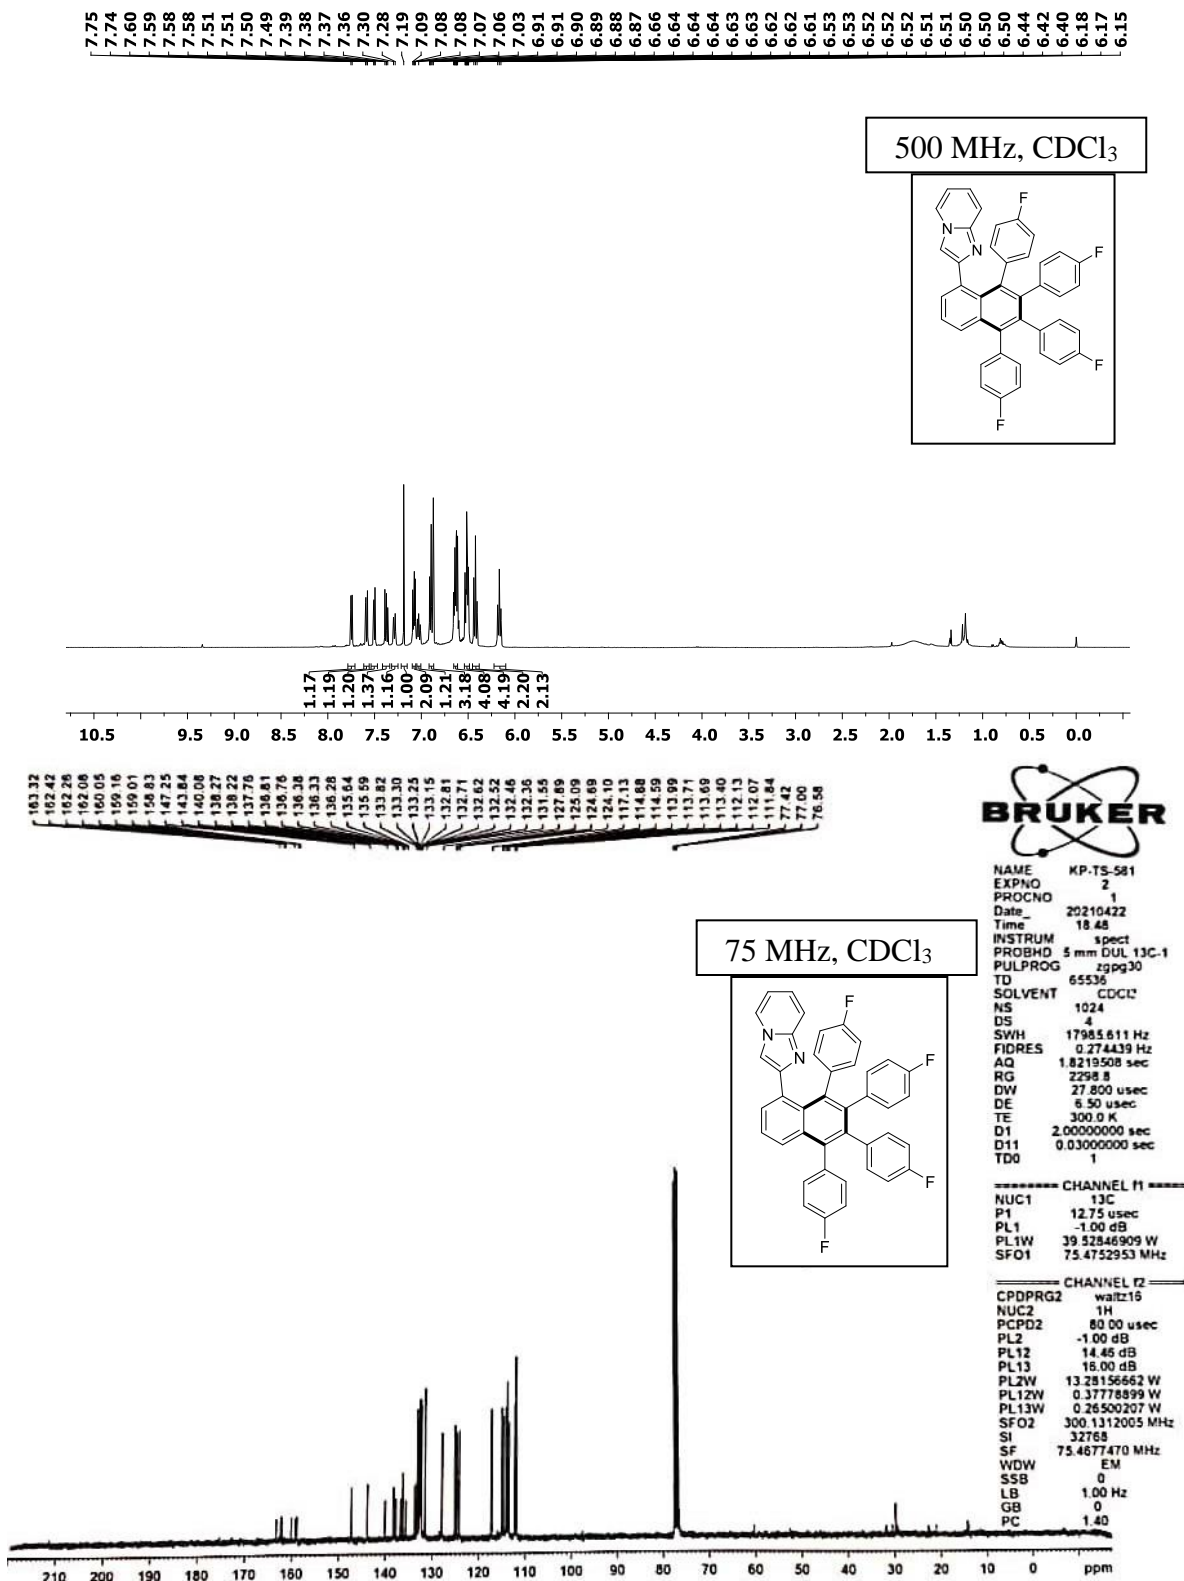

**$^{19}\text{F}$  NMR spectra of (5h)**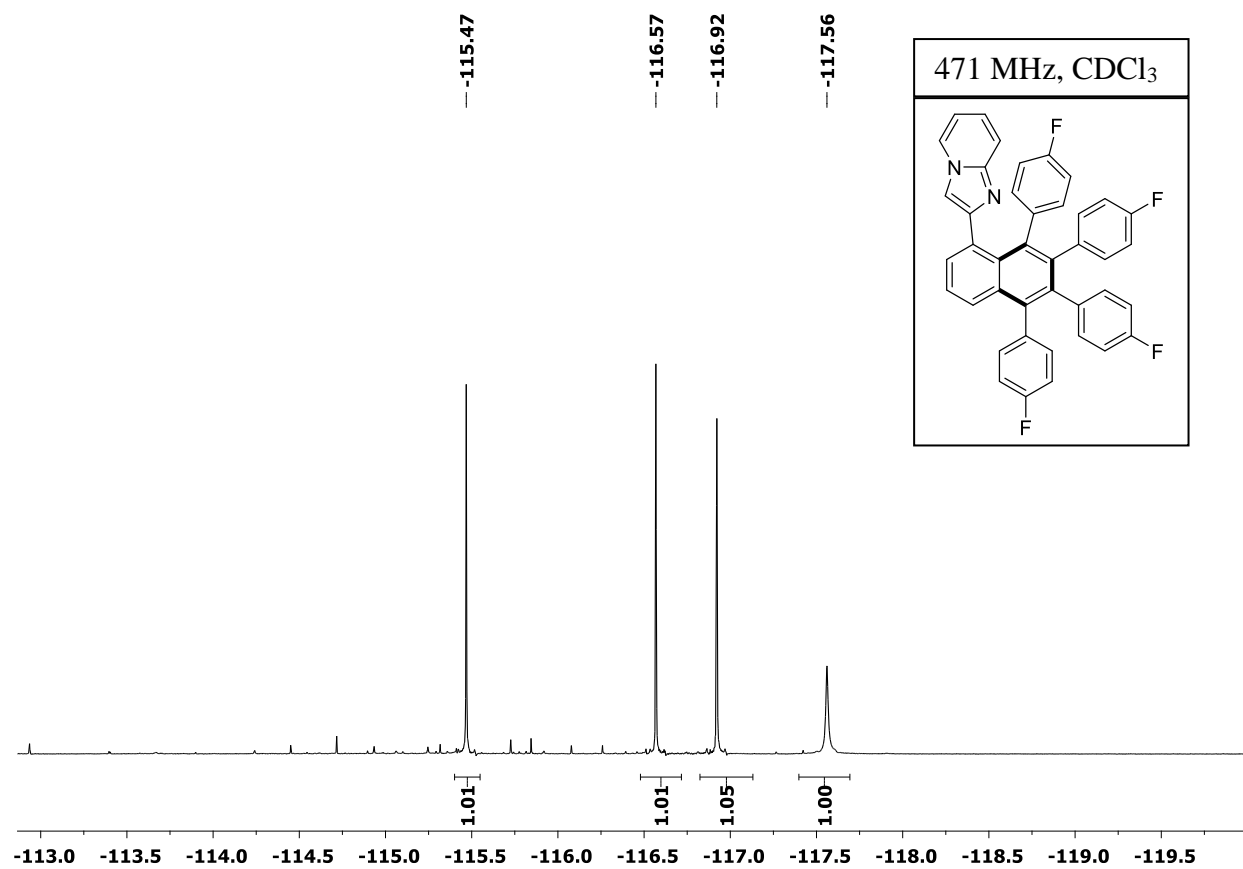

<sup>1</sup>H and <sup>13</sup>C NMR spectra of compound (5i)

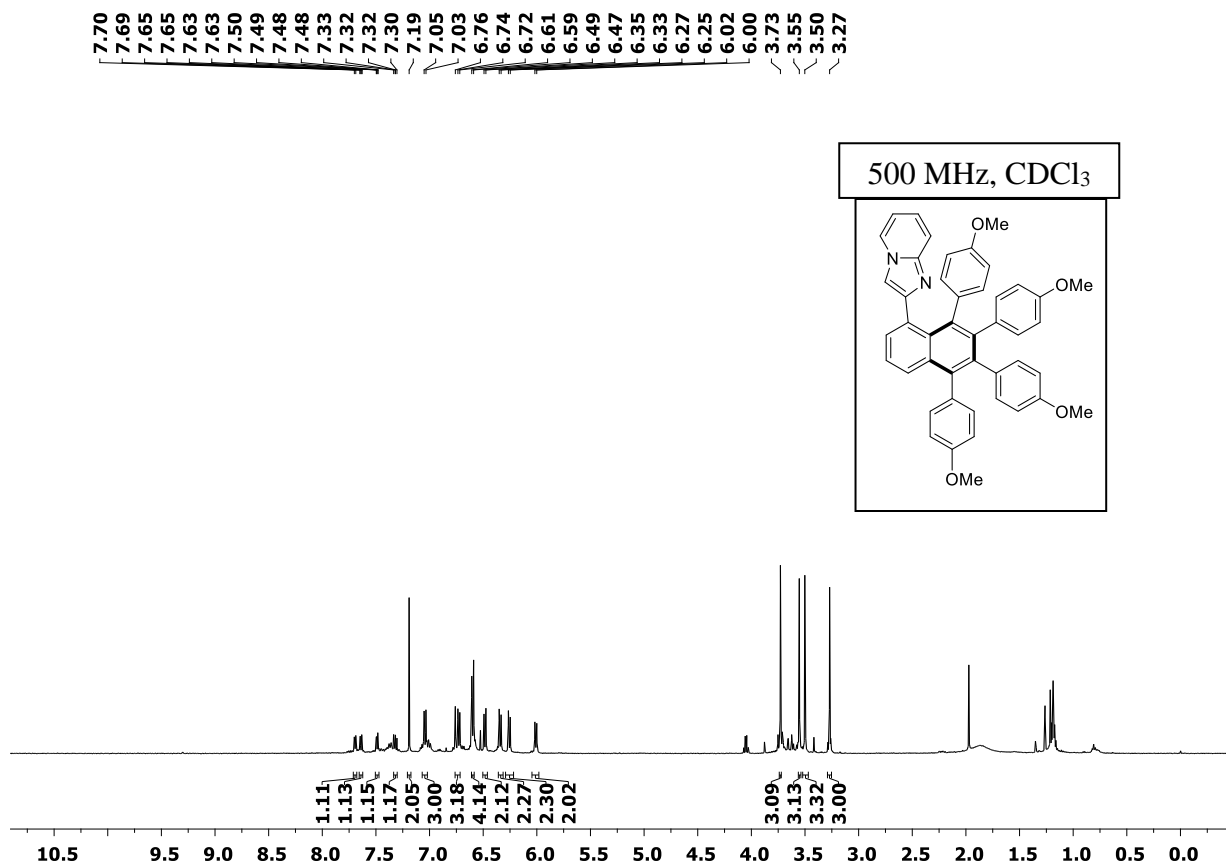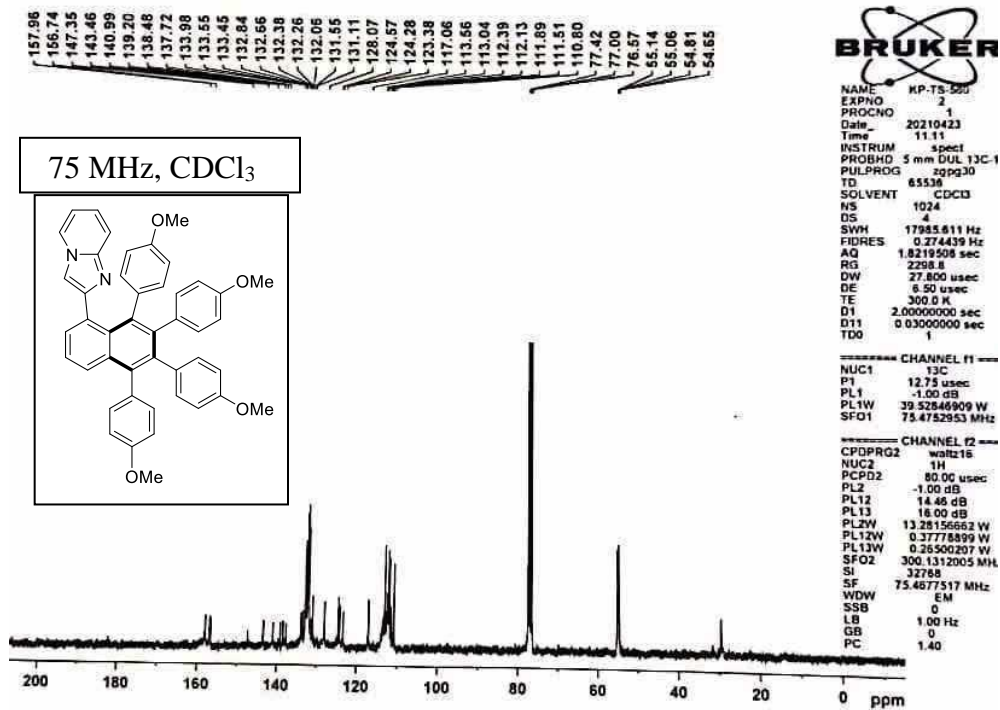

$^1\text{H}$  and  $^{13}\text{C}$  NMR spectra of compound (**5j**)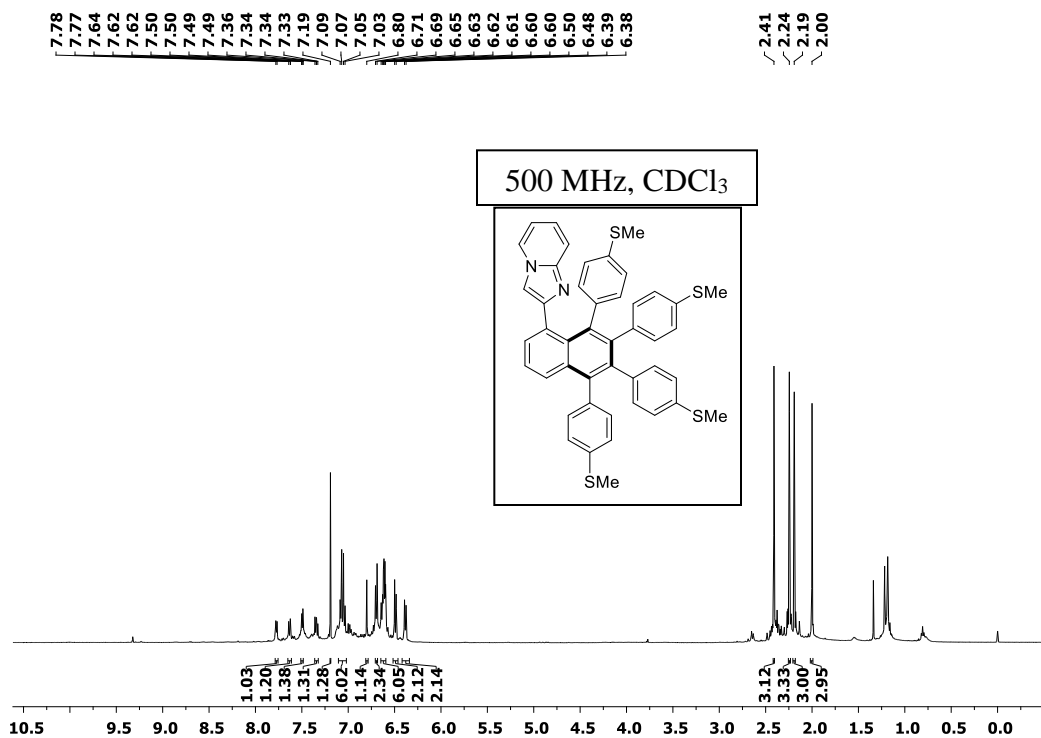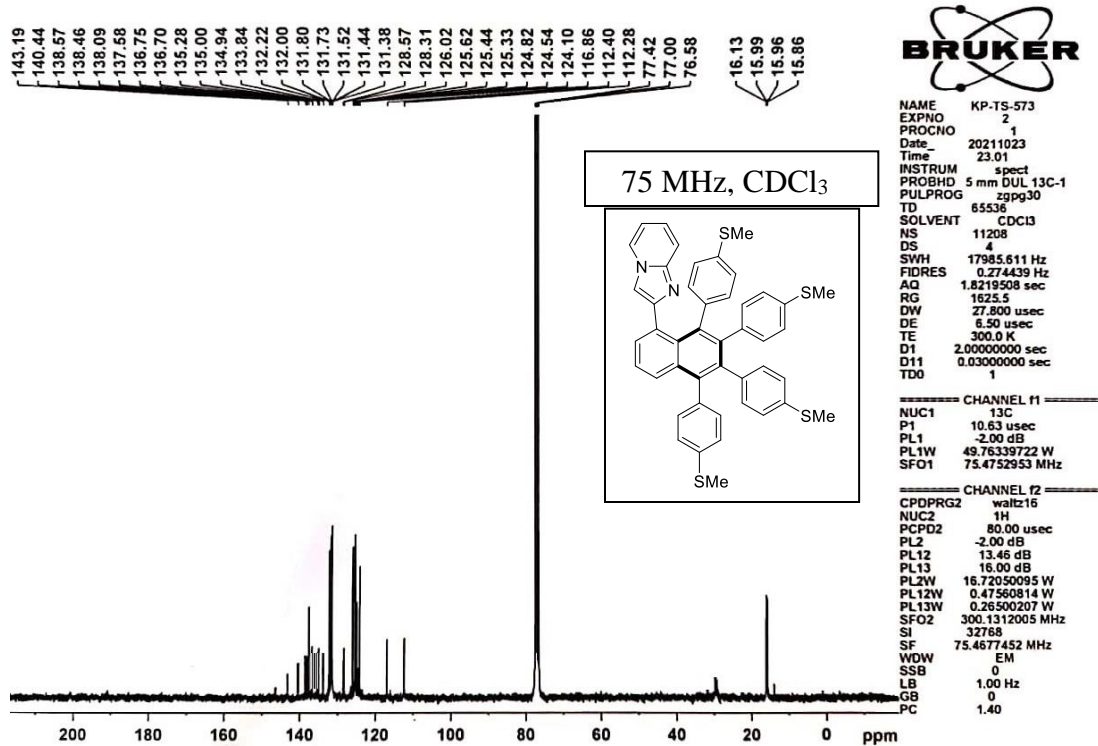

$^1\text{H}$  and  $^{13}\text{C}$  NMR spectra of compound (**5k**)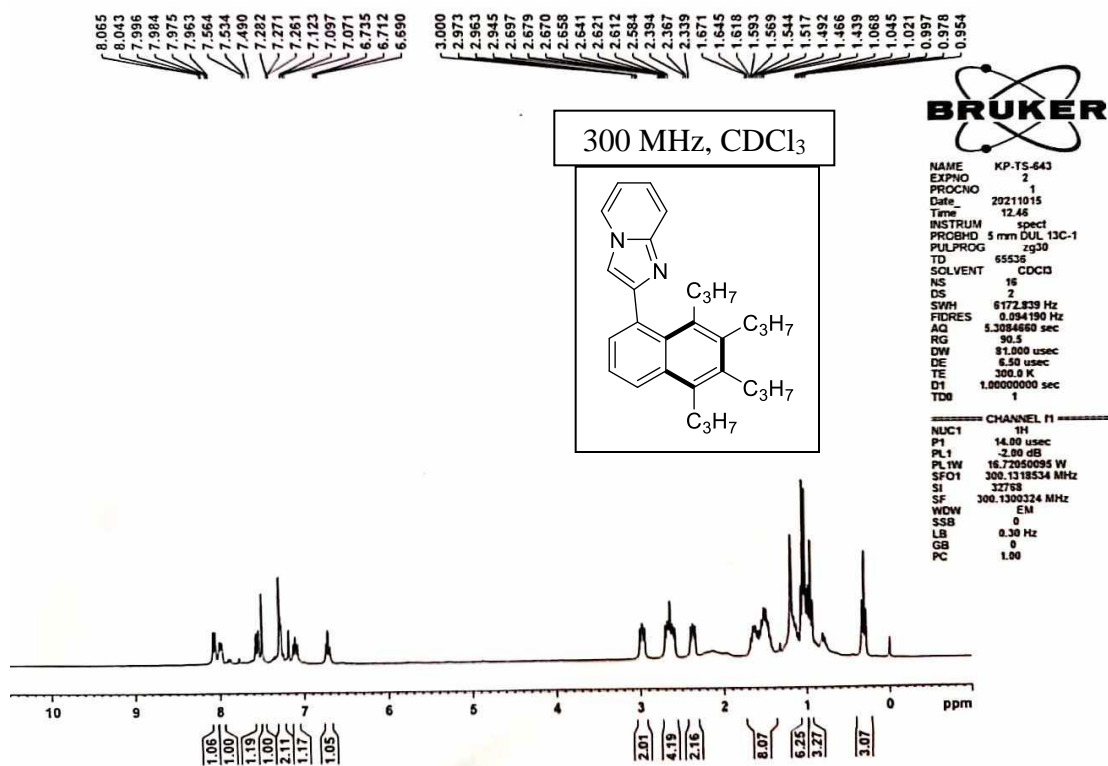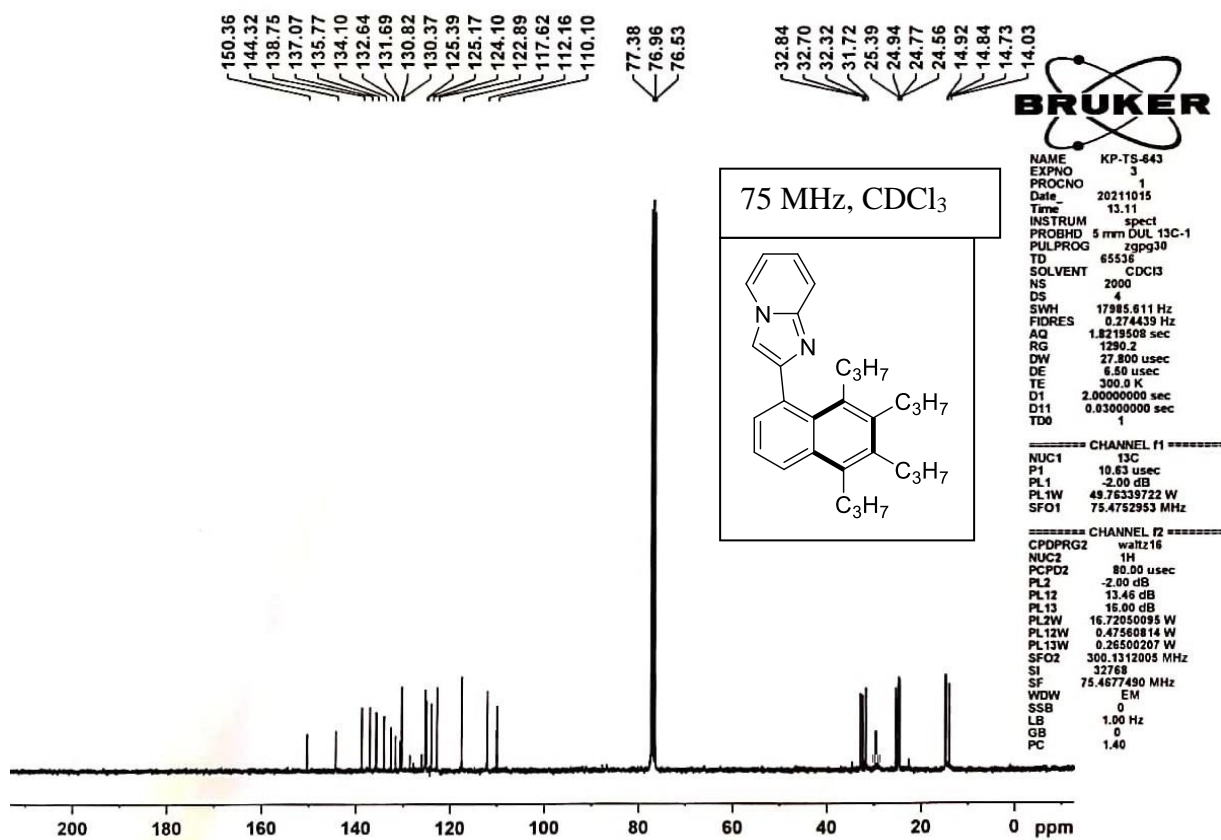

2-(5,7-Dimethyl-6,8-diphenylnaphthalen-1-yl)imidazo[1,2-a]pyridine (5I) and 2-(5,8-dimethyl-6,7-diphenylnaphthalen-1-yl)imidazo[1,2-a]pyridine (5I')

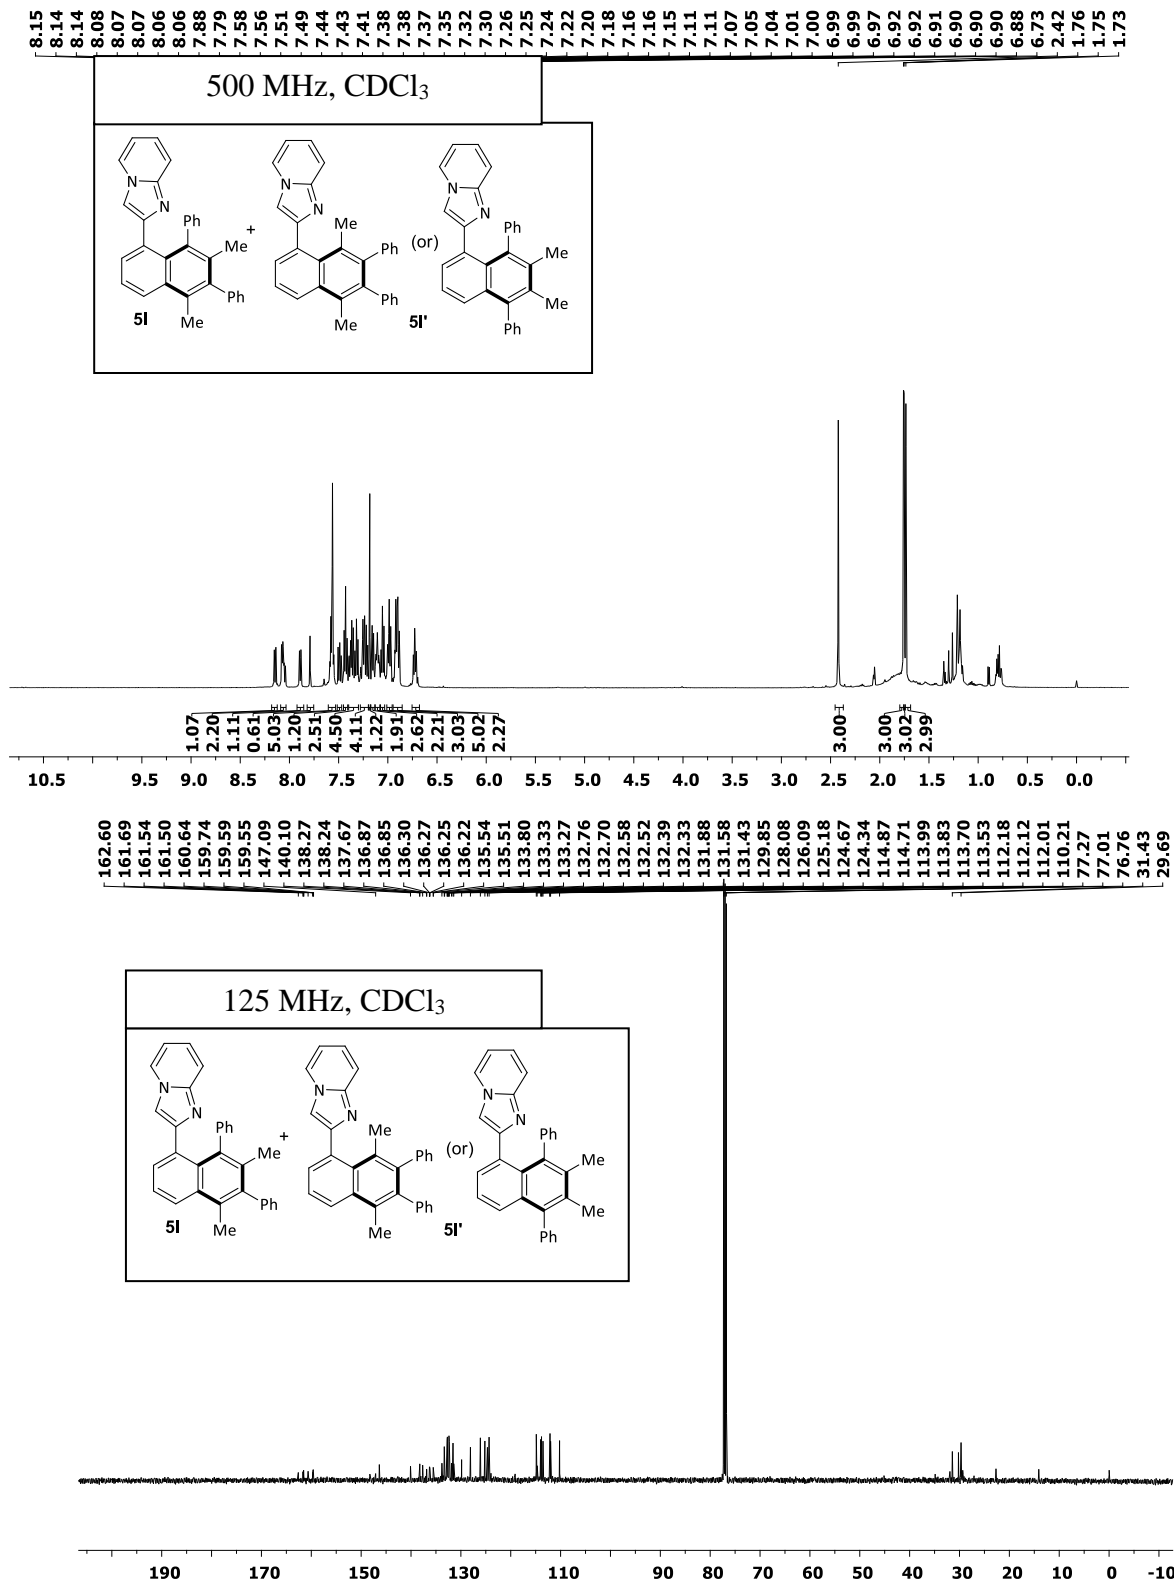

$^1\text{H}$  and  $^{13}\text{C}$  NMR spectra of compound (7a)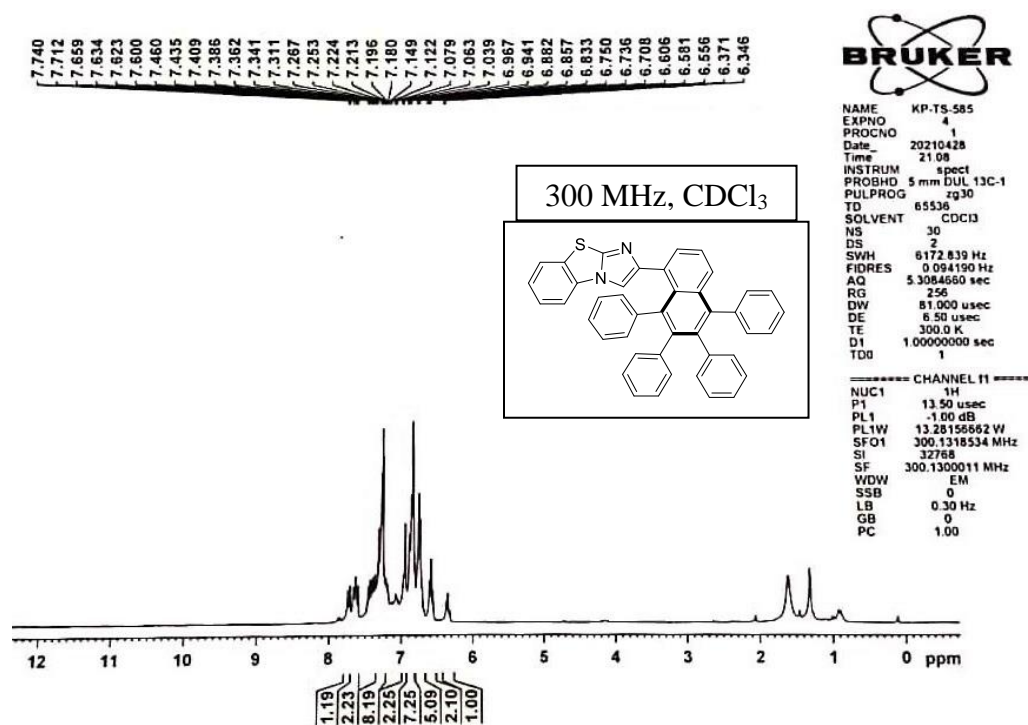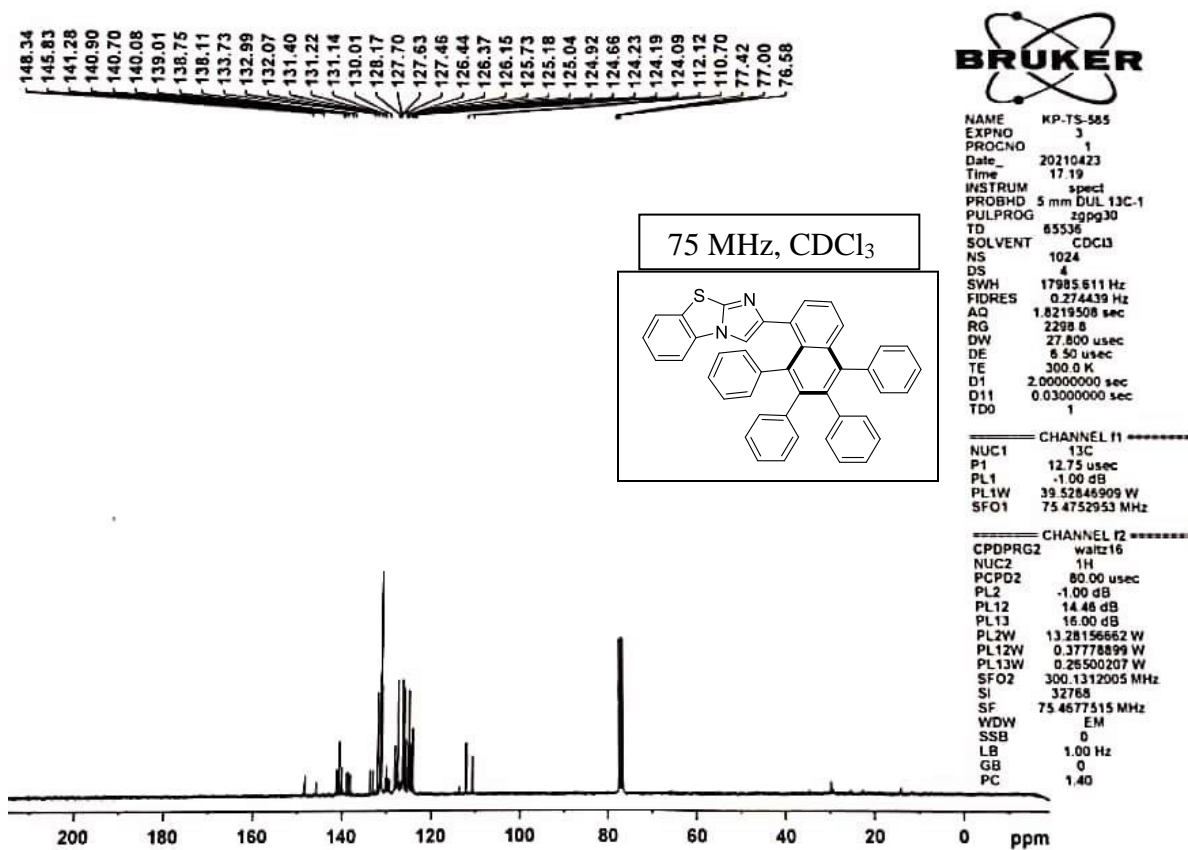

$^1\text{H}$  and  $^{13}\text{C}$  NMR spectra of compound (7b)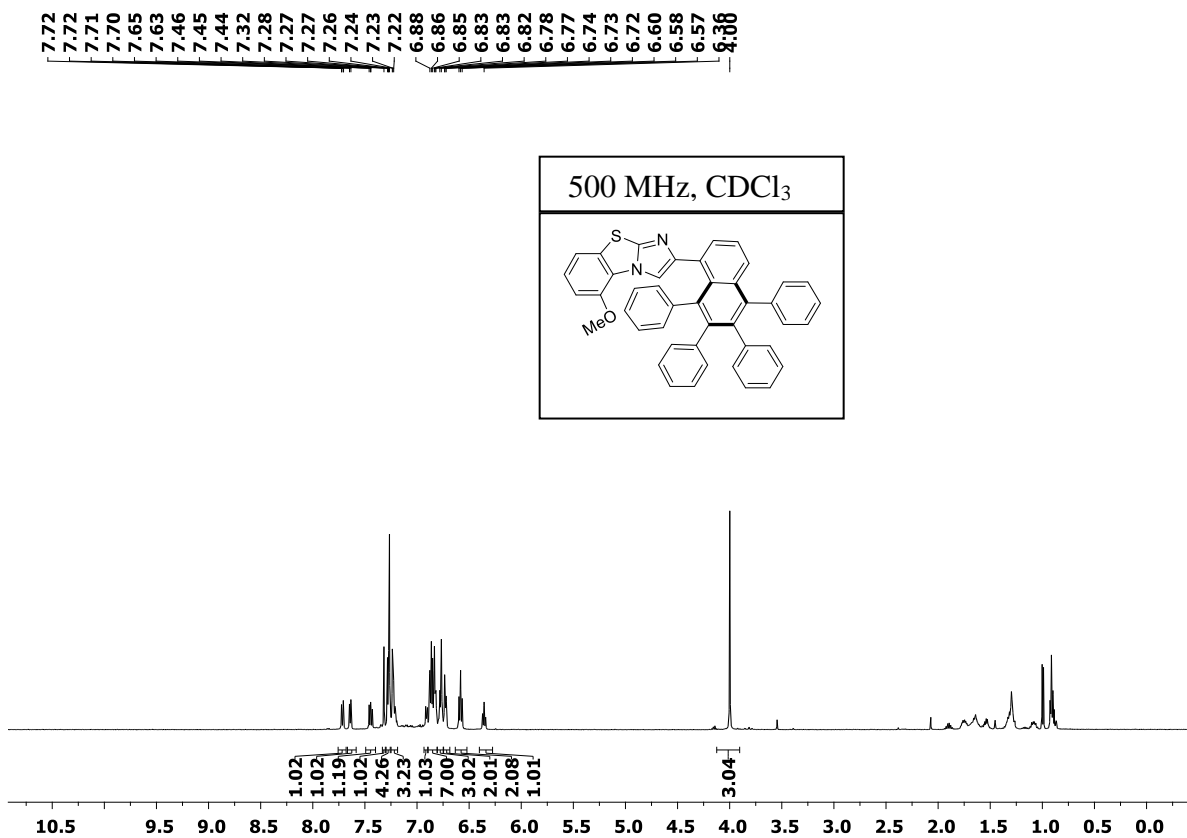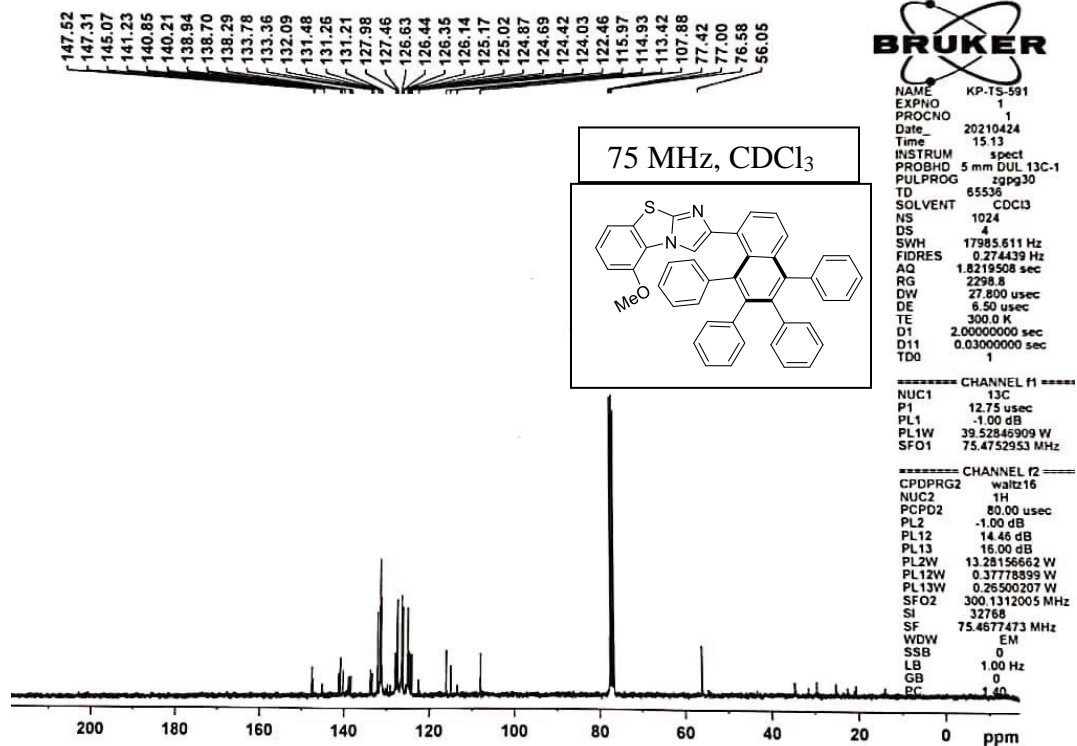



$^1\text{H}$  and  $^{13}\text{C}$  NMR spectra of compound (7c)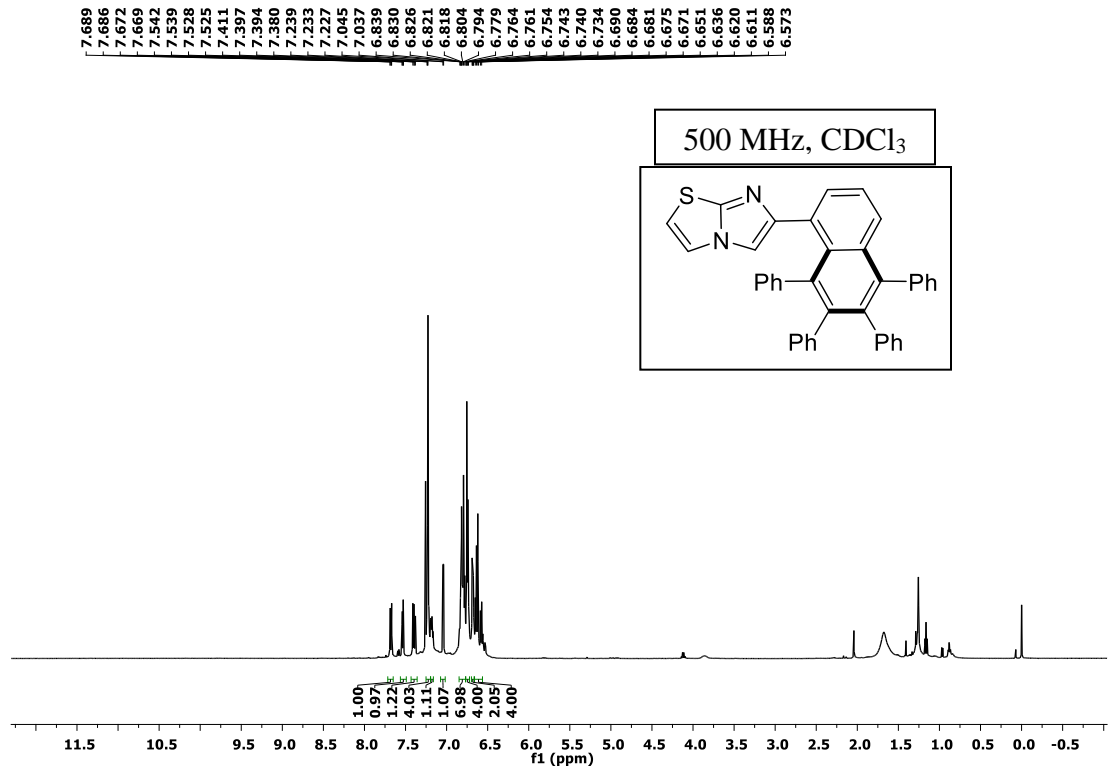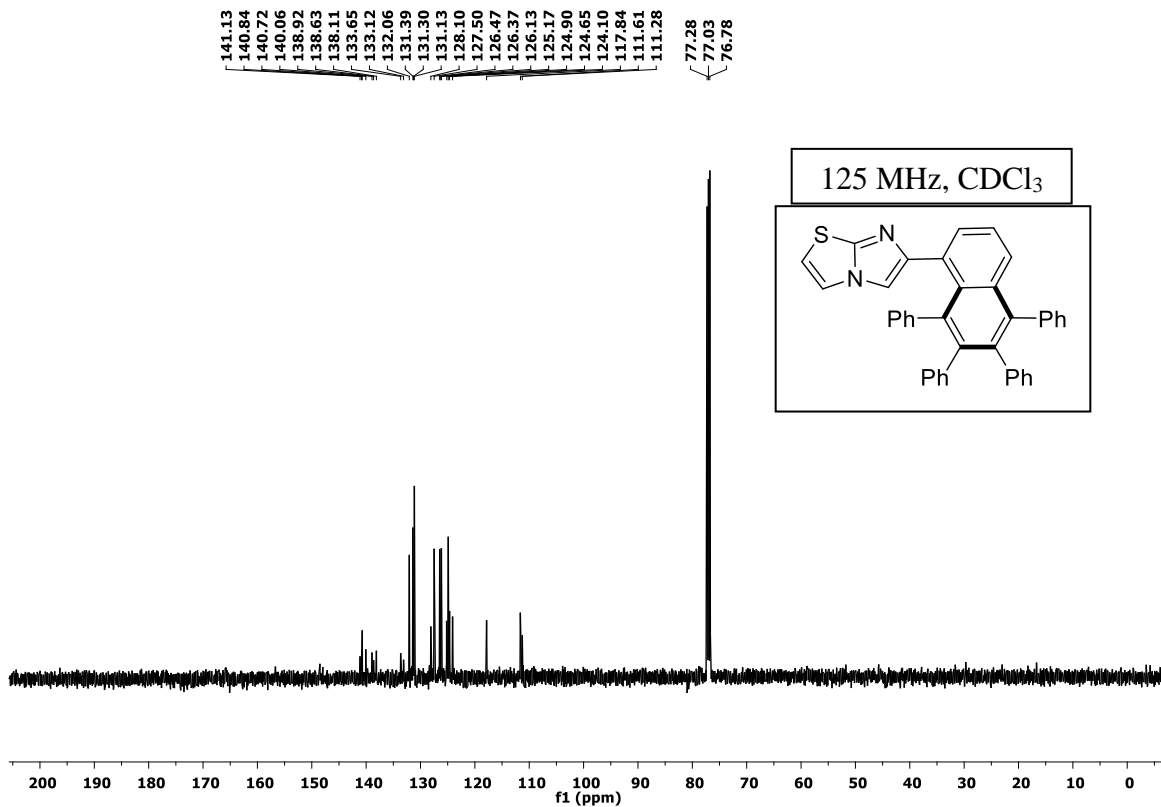

$^1\text{H}$  and  $^{13}\text{C}$  NMR spectra of compound (7d)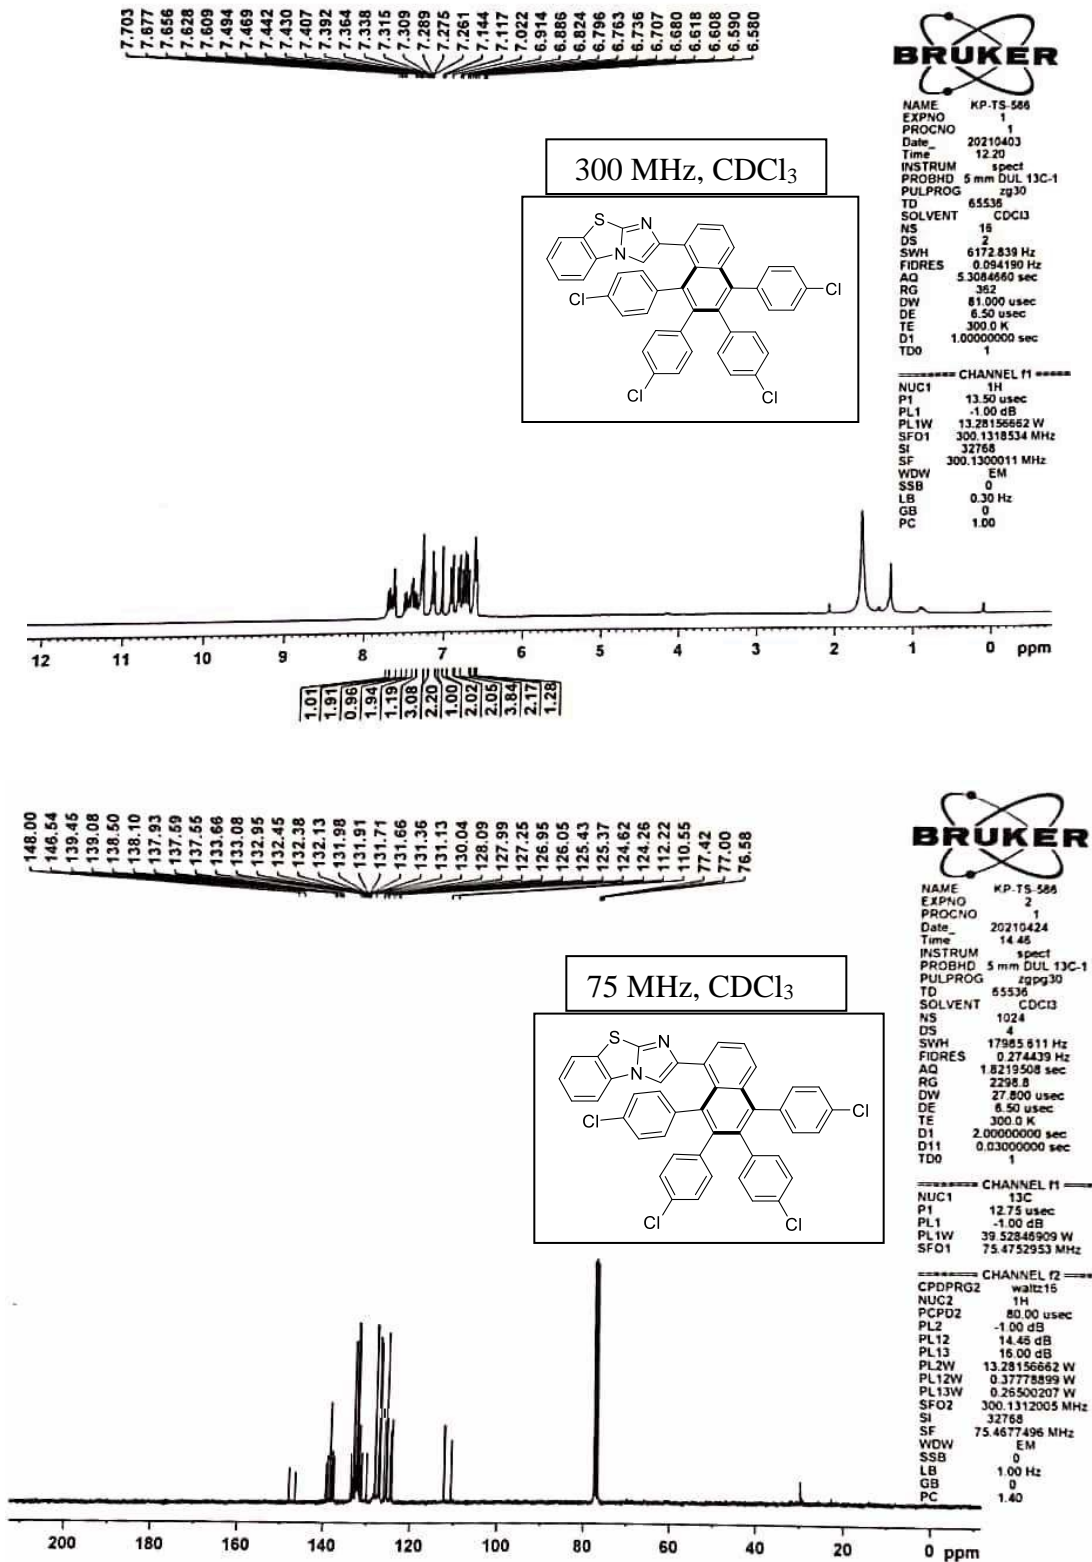

$^1\text{H}$  and  $^{13}\text{C}$  NMR spectra of compound (7e)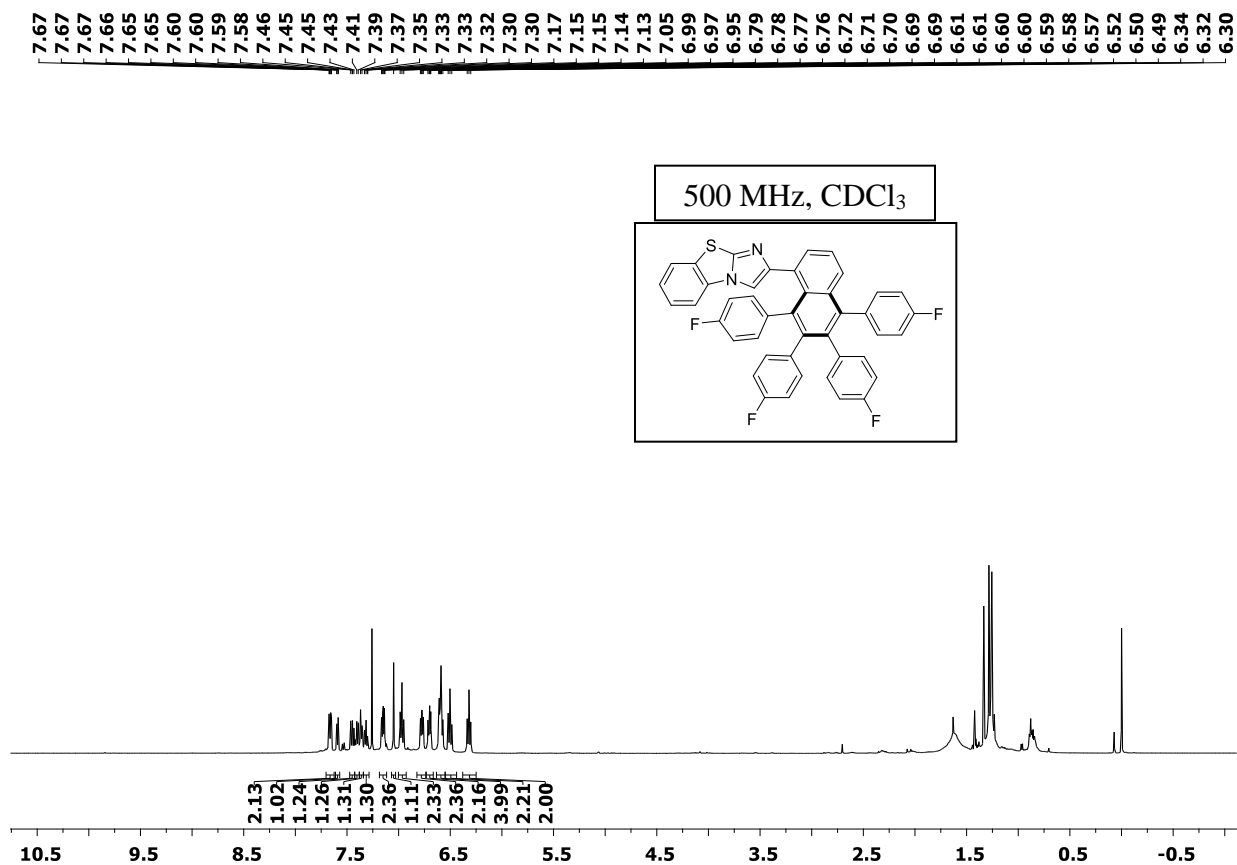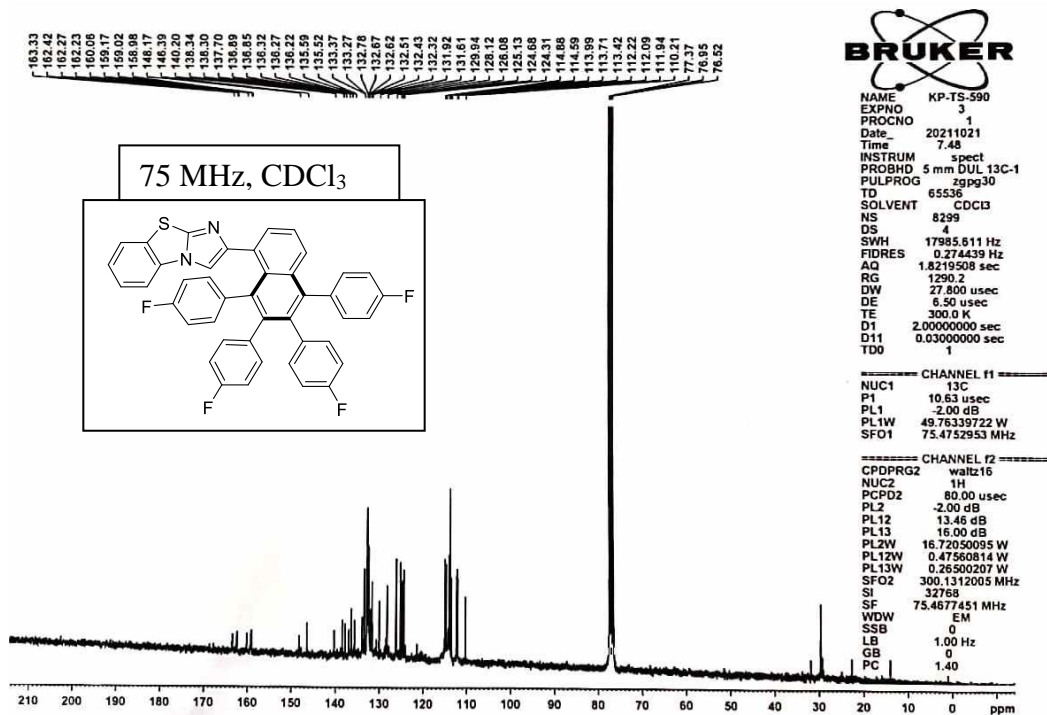

**$^{19}\text{F}$  NMR spectra of (7e)**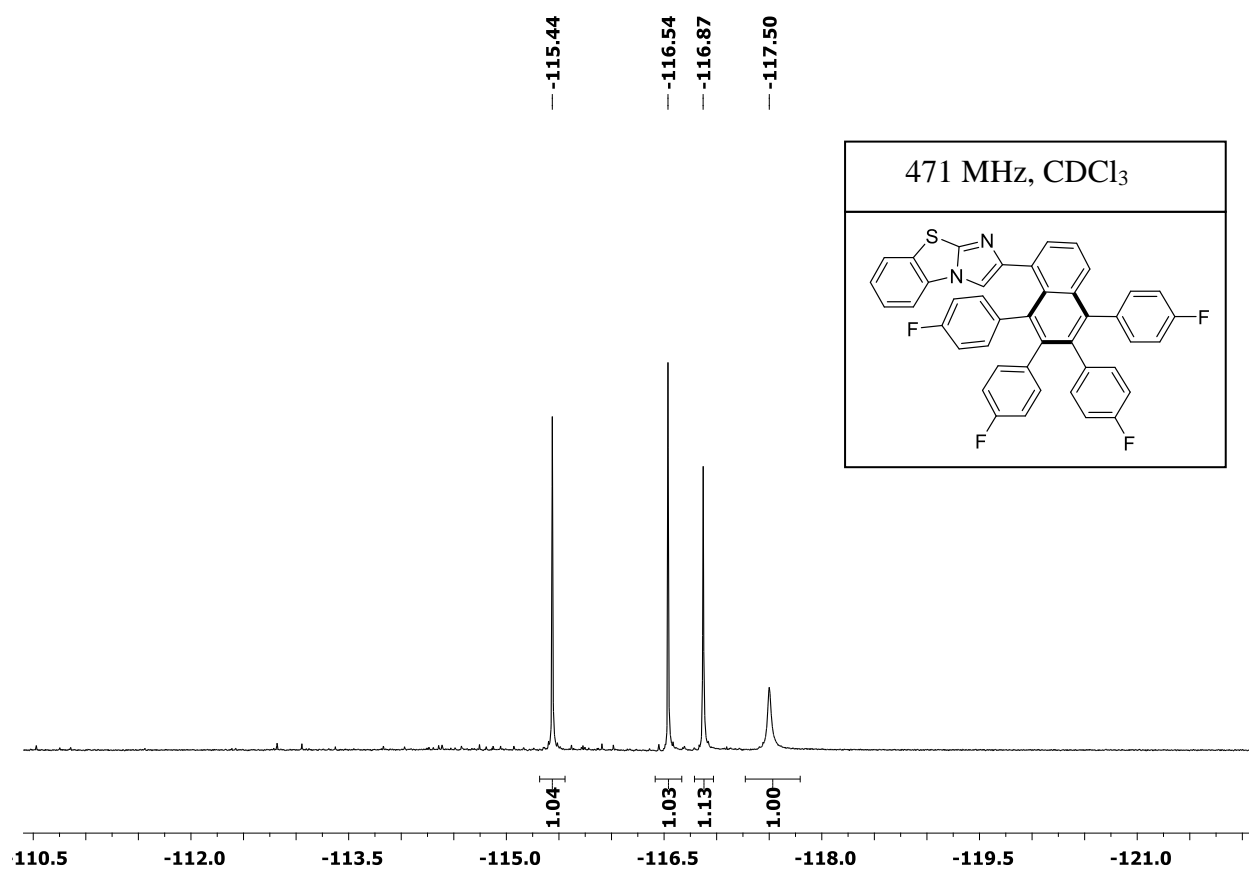

$^1\text{H}$  and  $^{13}\text{C}$  NMR spectra of compound (9a)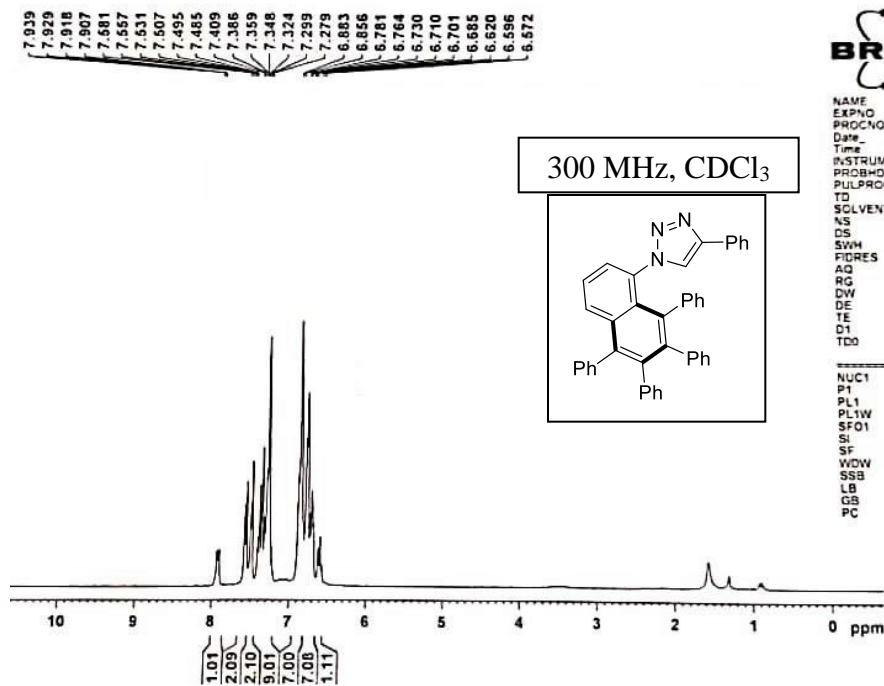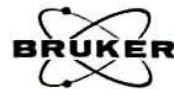

NAME KP-TS-538  
 EXPNO 3  
 PROCNO 1  
 Date\_ 20201020  
 Time 18.03  
 INSTRUM spect  
 PROBHD 5 mm DUL 13C-1  
 PULPROG zg30  
 TD 65536  
 SOLVENT  $\text{CDCl}_3$   
 NS 16  
 DS 2  
 SWH 6172.839 Hz  
 FIDRES 0.094190 Hz  
 AQ 5.3084560 sec  
 RG 322.5  
 DW 81.000 usec  
 DE 6.50 usec  
 TE 300.0 K  
 D1 1.00000000 sec  
 TDO 1

===== CHANNEL f1 =====  
 NUC1  $^1\text{H}$   
 P1 13.50 usec  
 PL1 -1.00 dB  
 PL1W 13.28156682 W  
 SFO1 300.1318534 MHz  
 SI 32768  
 SF 300.1300011 MHz  
 WDW EM  
 SSB 0  
 LB 0.30 Hz  
 GB 0  
 PC 1.00

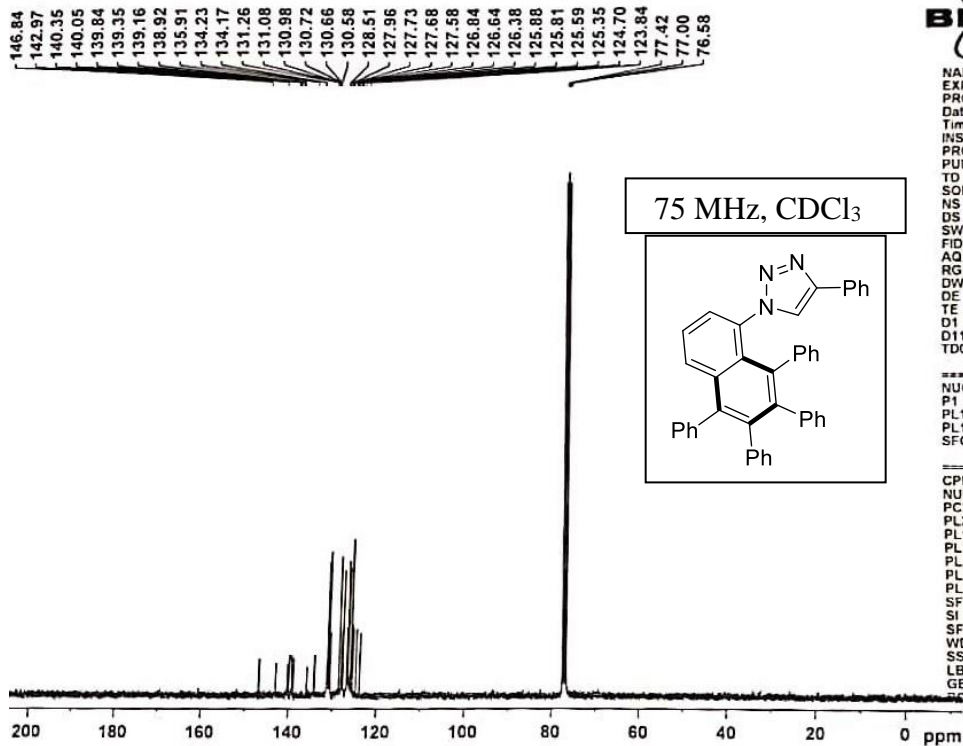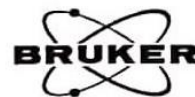

NAME KP-TS-538  
 EXPNO 2  
 PROCNO 1  
 Date\_ 20201020  
 Time 17.54  
 INSTRUM spect  
 PROBHD 5 mm DUL 13C-1  
 PULPROG zgpg30  
 TD 65536  
 SOLVENT  $\text{CDCl}_3$   
 NS 1464  
 DS 4  
 SWH 17985.611 Hz  
 FIDRES 0.274439 Hz  
 AQ 1.8219508 sec  
 RG 4597.6  
 DW 27.800 usec  
 DE 6.50 usec  
 TE 300.0 K  
 D1 2.00000000 sec  
 D11 0.03000000 sec  
 TDO 1

===== CHANNEL f1 =====  
 NUC1  $^{13}\text{C}$   
 P1 12.75 usec  
 PL1 -1.00 dB  
 PL1W 39.52846909 W  
 SFO1 75.4752953 MHz

===== CHANNEL f2 =====  
 CPDPRG2 waltz16  
 NUC2  $^1\text{H}$   
 PCPDZ 80.00 usec  
 PL2 -1.00 dB  
 PL12 14.46 dB  
 PL13 16.00 dB  
 PL2W 13.28156662 W  
 PL12W 0.37778899 W  
 PL13W 0.26500207 W  
 SFO2 300.1312005 MHz  
 SI 32768  
 SF 75.4677450 MHz  
 WDW EM  
 SSB 0  
 LB 1.00 Hz  
 GB 0  
 PC 1.40
